# Supplementary material for: Association of long-term exposure to PM2.5 with hypertension prevalence and blood pressure in China: a cross-sectional study
Source: PubMed Central journal article supplement — BMJ Open. 2021 Dec 9;11(12):e050159. doi: 10.1136/bmjopen-2021-050159 (PMC8663071; doi:10.1136/bmjopen-2021-050159), 2021-12-09
Supplement: bmjopen-2021-050159.draft_revisions.pdf [file bmjopen-2021-050159.draft_revisions.pdf]

# BMJ Open

BMJ Open is committed to open peer review. As part of this commitment we make the peer review history of every article we publish publicly available.

When an article is published we post the peer reviewers' comments and the authors' responses online. We also post the versions of the paper that were used during peer review. These are the versions that the peer review comments apply to.

The versions of the paper that follow are the versions that were submitted during the peer review process. They are not the versions of record or the final published versions. They should not be cited or distributed as the published version of this manuscript.

BMJ Open is an open access journal and the full, final, typeset and author-corrected version of record of the manuscript is available on our site with no access controls, subscription charges or pay-per-view fees (<http://bmjopen.bmj.com>).

If you have any questions on BMJ Open's open peer review process please email [info.bmjopen@bmj.com](mailto:info.bmjopen@bmj.com)

# BMJ Open

## Association of Long-term Exposure to PM2.5 with Blood Pressure and Hypertension Prevalence in China

|                               |                                                                                                                                                                                                                                                                                                                                                                                                                                                                                                                                                                                                                                                                                                                                                                                                                                                                                                                                                                                                                                                                                                                                                                                                                                                                                                                                                                                                                                                                                                                                                                                                                                                                                                                                                                                                                                                         |
|-------------------------------|---------------------------------------------------------------------------------------------------------------------------------------------------------------------------------------------------------------------------------------------------------------------------------------------------------------------------------------------------------------------------------------------------------------------------------------------------------------------------------------------------------------------------------------------------------------------------------------------------------------------------------------------------------------------------------------------------------------------------------------------------------------------------------------------------------------------------------------------------------------------------------------------------------------------------------------------------------------------------------------------------------------------------------------------------------------------------------------------------------------------------------------------------------------------------------------------------------------------------------------------------------------------------------------------------------------------------------------------------------------------------------------------------------------------------------------------------------------------------------------------------------------------------------------------------------------------------------------------------------------------------------------------------------------------------------------------------------------------------------------------------------------------------------------------------------------------------------------------------------|
| Journal:                      | <i>BMJ Open</i>                                                                                                                                                                                                                                                                                                                                                                                                                                                                                                                                                                                                                                                                                                                                                                                                                                                                                                                                                                                                                                                                                                                                                                                                                                                                                                                                                                                                                                                                                                                                                                                                                                                                                                                                                                                                                                         |
| Manuscript ID                 | bmjopen-2021-050159                                                                                                                                                                                                                                                                                                                                                                                                                                                                                                                                                                                                                                                                                                                                                                                                                                                                                                                                                                                                                                                                                                                                                                                                                                                                                                                                                                                                                                                                                                                                                                                                                                                                                                                                                                                                                                     |
| Article Type:                 | Original research                                                                                                                                                                                                                                                                                                                                                                                                                                                                                                                                                                                                                                                                                                                                                                                                                                                                                                                                                                                                                                                                                                                                                                                                                                                                                                                                                                                                                                                                                                                                                                                                                                                                                                                                                                                                                                       |
| Date Submitted by the Author: | 18-Feb-2021                                                                                                                                                                                                                                                                                                                                                                                                                                                                                                                                                                                                                                                                                                                                                                                                                                                                                                                                                                                                                                                                                                                                                                                                                                                                                                                                                                                                                                                                                                                                                                                                                                                                                                                                                                                                                                             |
| Complete List of Authors:     | <p>Song, Jiali; Chinese Academy of Medical Sciences &amp; Peking Union Medical College Fuwai Hospital, National Clinical Research Center for Cardiovascular Diseases</p> <p>Gao, Yan; Chinese Academy of Medical Sciences &amp; Peking Union Medical College Fuwai Hospital, National Clinical Research Center for Cardiovascular Diseases</p> <p>Hu, Shuang; Chinese Academy of Medical Sciences &amp; Peking Union Medical College Fuwai Hospital, National Clinical Research Center for Cardiovascular Diseases</p> <p>Medda, Emanuela; Istituto Superiore di Sanità, Reference Centre for Behavioural Sciences and Mental Health</p> <p>Tang, Guigang; Ministry of Ecology and Environment of the People's Republic of China, China National Environmental Monitoring Centre</p> <p>Zhang, Di; Ministry of Ecology and Environment of the People's Republic of China, China National Environmental Monitoring Centre</p> <p>Zhang, Wenbo; Chinese Academy of Medical Sciences &amp; Peking Union Medical College Fuwai Hospital, National Clinical Research Center for Cardiovascular Diseases</p> <p>Li, Xi; Chinese Academy of Medical Sciences &amp; Peking Union Medical College Fuwai Hospital, National Clinical Research Center for Cardiovascular Diseases</p> <p>Li, Jing; Chinese Academy of Medical Sciences &amp; Peking Union Medical College Fuwai Hospital, National Clinical Research Center for Cardiovascular Diseases</p> <p>Renzi, Matteo; Department of Epidemiology of the Regional Health Service Lazio, Epidemiology,</p> <p>Stazi, Maria Antonietta; Istituto Superiore di Sanità, Reference Centre for Behavioural Sciences and Mental Health</p> <p>Zheng, Xin; Chinese Academy of Medical Sciences &amp; Peking Union Medical College Fuwai Hospital, National Clinical Research Center for Cardiovascular Diseases</p> |
| Keywords:                     | Epidemiology < TROPICAL MEDICINE, Public health < INFECTIOUS DISEASES, Hypertension < CARDIOLOGY                                                                                                                                                                                                                                                                                                                                                                                                                                                                                                                                                                                                                                                                                                                                                                                                                                                                                                                                                                                                                                                                                                                                                                                                                                                                                                                                                                                                                                                                                                                                                                                                                                                                                                                                                        |
|                               |                                                                                                                                                                                                                                                                                                                                                                                                                                                                                                                                                                                                                                                                                                                                                                                                                                                                                                                                                                                                                                                                                                                                                                                                                                                                                                                                                                                                                                                                                                                                                                                                                                                                                                                                                                                                                                                         |

1  
2  
3  
4  
5  
6  
7  
8  
9  
10  
11  
12  
13  
14  
15  
16  
17  
18  
19  
20  
21  
22  
23  
24  
25  
26  
27  
28  
29  
30  
31  
32  
33  
34  
35  
36  
37  
38  
39  
40  
41  
42  
43  
44  
45  
46  
47  
48  
49  
50  
51  
52  
53  
54  
55  
56  
57  
58  
59  
60

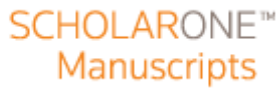

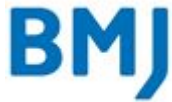

I, the Submitting Author has the right to grant and does grant on behalf of all authors of the Work (as defined in the below author licence), an exclusive licence and/or a non-exclusive licence for contributions from authors who are: i) UK Crown employees; ii) where BMJ has agreed a CC-BY licence shall apply, and/or iii) in accordance with the terms applicable for US Federal Government officers or employees acting as part of their official duties; on a worldwide, perpetual, irrevocable, royalty-free basis to BMJ Publishing Group Ltd ("BMJ") its licensees and where the relevant Journal is co-owned by BMJ to the co-owners of the Journal, to publish the Work in this journal and any other BMJ products and to exploit all rights, as set out in our [licence](#).

The Submitting Author accepts and understands that any supply made under these terms is made by BMJ to the Submitting Author unless you are acting as an employee on behalf of your employer or a postgraduate student of an affiliated institution which is paying any applicable article publishing charge ("APC") for Open Access articles. Where the Submitting Author wishes to make the Work available on an Open Access basis (and intends to pay the relevant APC), the terms of reuse of such Open Access shall be governed by a Creative Commons licence – details of these licences and which [Creative Commons](#) licence will apply to this Work are set out in our licence referred to above.

Other than as permitted in any relevant BMJ Author's Self Archiving Policies, I confirm this Work has not been accepted for publication elsewhere, is not being considered for publication elsewhere and does not duplicate material already published. I confirm all authors consent to publication of this Work and authorise the granting of this licence.

**TITLE PAGE****Association of Long-term Exposure to PM<sub>2.5</sub> with Blood Pressure and Hypertension  
Prevalence in China****Authors:**

Jiali Song\*, MD; Yan Gao\*, MSc; Shuang Hu, PhD; Emanuela Medda, MSc; Guigang Tang, MSc; Di Zhang, MSc; Wenbo Zhang, MPH; Xi Li, MD, PhD; Jing Li, MD, PhD; Matteo Renzi, MSc; Maria Antonietta Stazi, MSc; Xin Zheng†, MD, PhD

\*Joint first authors

†Corresponding author

**Author Affiliations:**

National Clinical Research Center for Cardiovascular Diseases, NHC Key Laboratory of Clinical Research for Cardiovascular Medications, State Key Laboratory of Cardiovascular Disease, Fuwai Hospital, Chinese Academy of Medical Sciences and Peking Union Medical College, National Center for Cardiovascular Diseases (Song, Gao, Hu, W. Zhang, X. Li, J. Li, Zheng); Reference Centre for Behavioural Sciences and Mental Health, Istituto Superiore di Sanità, Rome, Italy (Medda, Stazi); Department of Epidemiology of Lazio Region, Rome, Italy (Renzi); China National Environmental Monitoring Centre, State Environmental Protection Key Laboratory of Quality Control in Environmental Monitoring, Ministry of Ecology and Environment of the People's Republic of China (Tang, D. Zhang)

**Correspondence:** Dr. Xin Zheng, National Clinical Research Center for Cardiovascular Diseases, Fuwai Hospital, 167 Beilishi Road, Beijing 100037, People's Republic of China; Tel: +86 010 6086 6719; Email: xin.zheng@fwoxford.org

1  
2  
3  
4  
5 Word count: 2,814 words (main text)  
6  
7

8 Number of figures: 4  
9  
10  
11  
12  
13  
14  
15  
16  
17  
18  
19  
20  
21  
22  
23  
24  
25  
26  
27  
28  
29  
30  
31  
32  
33  
34  
35  
36  
37  
38  
39  
40  
41  
42  
43  
44  
45  
46  
47  
48  
49  
50  
51  
52  
53  
54  
55  
56  
57  
58  
59  
60

For peer review only

## ABSTRACT

**Objective:** We aim to assess associations of long-term exposure to PM<sub>2.5</sub> with hypertension prevalence and blood pressure, especially in populations exposed to high PM<sub>2.5</sub> concentrations in China.

**Methods:** We studied 883,827 participants aged 35–75 years in the China Patient-Centered Evaluative Assessment of Cardiac Events (PEACE) Million Persons Project. The 1-year average concentration of daily-specific PM<sub>2.5</sub> from monitoring stations was calculated to estimate the PM<sub>2.5</sub> exposure. The associations of PM<sub>2.5</sub> exposure with hypertension prevalence and blood pressure were investigated by generalized linear models. PM<sub>2.5</sub> was included through either linear or spline functions to assess evidence of nonlinearity.

**Results:** On average, each 10 µg/m<sup>3</sup> increase in the PM<sub>2.5</sub> exposure was associated with increased odds of hypertension prevalence (adjusted OR: 1.09, 95% CI: 1.08–1.10), systolic blood pressure (0.50 mmHg, 95% CI: 0.41–0.59), and diastolic blood pressure (0.23 mmHg, 95% CI: 0.18–0.28). The concentration-response curves for hypertension prevalence and systolic blood pressure showed a consistent increase with increasing PM<sub>2.5</sub> concentration, with steeper slopes at high PM<sub>2.5</sub> levels; while the curve for diastolic blood pressure was U-shaped. The elderly, men, and non-current smokers were more prone to adverse effects of PM<sub>2.5</sub>.

**Conclusions:** Long-term exposure to PM<sub>2.5</sub> is associated with higher blood pressure and an increased risk of hypertension prevalence. The effects of PM<sub>2.5</sub> become more pronounced at higher PM<sub>2.5</sub> levels. These findings emphasize the need to reduce air pollution, especially in areas with severe air pollution.

1  
2  
3  
4  
5  
6  
7 **Keywords:** Air pollution; Blood pressure; Hypertension  
8  
9  
10  
11  
12  
13  
14  
15  
16  
17  
18  
19  
20  
21  
22  
23  
24  
25  
26  
27  
28  
29  
30  
31  
32  
33  
34  
35  
36  
37  
38  
39  
40  
41  
42  
43  
44  
45  
46  
47  
48  
49  
50  
51  
52  
53  
54  
55  
56  
57  
58  
59  
60

For peer review only



### Strengths and limitations of this study

- The large size of our study allowed us to comprehensively assess these associations among a diverse spectrum of population across a wider range of PM<sub>2.5</sub> concentrations in China.
- The large number of participants with hypertension and high level of PM<sub>2.5</sub> exposure (e.g. >35 µg/m<sup>3</sup>), enabled us to examine these associations with greater precision and sufficient statistical power.
- Given the nature of the cross-sectional study design, the causal relationship could not be established.
- A selection bias is possible because our analysis was restricted to participants with available PM<sub>2.5</sub> data.

## 1 INTRODUCTION

2 Hypertension is the leading modifiable risk factor for death globally.<sup>1</sup> Although  
3 hypertension is a worldwide public health concern, three quarters of the world's population  
4 with the condition are living in low- and middle-income countries (LMICs).<sup>2</sup> The causes of  
5 hypertension are complex. Apart from genetic predisposition, social determinants, and  
6 lifestyle factors, air pollution, especially fine particulate matter with an aerodynamic diameter  
7 of 2.5 µm or less (PM<sub>2.5</sub>), may also contribute to increased risk for hypertension.<sup>3,4</sup>

8 Over the past few years, a growing body of epidemiological evidence indicated the  
9 association of long-term exposure to PM<sub>2.5</sub> with blood pressure and hypertension.<sup>5-14</sup>  
10 However, such studies were mostly undertaken in high-income countries.<sup>9-14</sup> Compared with  
11 high-income countries, exposure to PM<sub>2.5</sub> is substantially higher in LMICs; and genetic  
12 characteristics as well as lifestyle also differ,<sup>15,16</sup> limiting direct extrapolation of risk estimates  
13 from high-income countries to LMICs. Several studies have been performed in LMICs, but  
14 they were largely confined to specific populations (such as reproductive-aged adults) or  
15 regions.<sup>5-8,17</sup> Therefore, further studies are needed to assess the associations of PM<sub>2.5</sub> with  
16 blood pressure and prevalence of hypertension among a wider spectrum of populations with  
17 high PM<sub>2.5</sub> concentrations, especially in LMICs.

18 China is experiencing a growing epidemic of hypertension and is estimated to have 300  
19 million individuals with hypertension by 2025.<sup>18</sup> Meanwhile, outdoor PM<sub>2.5</sub> has become one of  
20 China's most serious environmental problems with provincial population-weighted means of  
21 PM<sub>2.5</sub> ranging from 19.1 µg/m<sup>3</sup> to 79.3 µg/m<sup>3</sup> in 2015.<sup>15</sup> A deeper understanding of the  
22 chronic health effects of PM<sub>2.5</sub> on hypertension prevalence and blood pressure in moderate

1  
2  
3  
4 23 to high PM<sub>2.5</sub> concentrations will help to support policy making of air quality improvement and  
5  
6 24 combat the hypertension epidemic in China.  
7  
8

9 25 Accordingly, incorporating PM<sub>2.5</sub> data with a large-scale population-based screening  
10  
11 26 project in China, the China Patient-Centered Evaluative Assessment of Cardiac Events  
12  
13  
14 27 (PEACE) Million Persons Project, we aimed to: (1) explore the association of long-term PM<sub>2.5</sub>  
15  
16  
17 28 exposure with blood pressure level and the hypertension prevalence, and evaluate  
18  
19  
20 29 subpopulation differences in these associations; (2) assess the concentration-response  
21  
22 30 relationships of long-term PM<sub>2.5</sub> exposure with hypertension prevalence and blood pressure.  
23  
24

25 31

## 27 32 **METHODS**

### 30 33 **Study population**

32 34 Our study population is derived from the China PEACE Million Persons Project, which  
33  
34  
35 35 has been described previously.<sup>19</sup> In brief, we selected sites (rural counties or urban districts)  
36  
37  
38 36 using a convenience sampling strategy in all 31 provinces in mainland China from  
39  
40  
41 37 September 2014 to March 2019. At each site, participants were enrolled if they were aged  
42  
43  
44 38 35 to 75 years, currently registered in the selected region's Hukou (a record officially  
45  
46  
47 39 identifying a person as a resident of an area), or had lived in the region for at least 6 of the  
48  
49  
50 40 previous 12 months. This project was registered on [www.clinicaltrials.gov](http://www.clinicaltrials.gov) (NCT02536456).  
51  
52  
53 41 In the present study, we included 897,937 participants with more than 330 valid PM<sub>2.5</sub> values  
54  
55  
56 42 for assessing long-term exposure. After excluding participants with missing data on  
57  
58  
59 43 education level (n=13,714), body mass index (n=321), or blood pressure measurement  
60  
44 (n=2), we further excluded participants with systolic blood pressure (SBP)  $\geq$ 250 mmHg or

1  
2  
3  
4 45 diastolic blood pressure (DBP)  $\geq 150$  mmHg to minimize the potential bias due to  
5  
6 46 measurement errors in blood pressure values (n=73). Finally, we included 883,827  
7  
8  
9 47 participants in the study sample. The central ethics committee at the China National Center  
10  
11 48 for Cardiovascular Diseases approved this project. All enrolled participants provided written  
12  
13  
14 49 informed consent.

## 17 50 **Data collection and variable definitions**

19 51 Data collection for each participant was performed by trained personnel with a  
20  
21  
22 52 standardized in-person interview and a physical examination. Information on  
23  
24  
25 53 sociodemographic status (age, gender, and education level), lifestyle (smoking and alcohol  
26  
27 54 use), medical history, and medication use were collected. Medication use was determined by  
28  
29  
30 55 asking participants whether they had taken prescribed medications for antiplatelet or  
31  
32  
33 56 controlling blood pressure, lipid, or glucose in the past 2 weeks. Those who answered "yes"  
34  
35 57 and knew the drug names were asked to report the name, dose, and frequency of each  
36  
37  
38 58 drug. Those who did not remember the exact dose stated the number of pills or tablets  
39  
40  
41 59 taken.

43 60 The blood pressure of each participant was measured twice on the right upper arm after  
44  
45 61 5 minutes of rest in a seated position with a standardized electronic blood pressure monitor  
46  
47  
48 62 (Omron HEM-7430). If the difference between the 2 systolic blood pressure readings was  
49  
50  
51 63 greater than 10 mmHg, a third measurement was obtained, and the average of the last 2  
52  
53 64 readings was used. Hypertension was defined as systolic blood pressure of 140 mmHg or  
54  
55  
56 65 higher, diastolic blood pressure of 90 mmHg or higher, or use of antihypertensive  
57  
58  
59 66 medications, which is consistent with the US Joint National Committee and Chinese

1  
2  
3  
4 67 definitions<sup>20-22</sup>. Body mass index (BMI) was defined as weight in kilograms divided by height  
5  
6 68 in square meters. Obesity was defined as 28.0 kg/m<sup>2</sup> or higher, on the basis of  
7  
8  
9 69 recommendations from the Working Group on Obesity in China.<sup>23</sup>  
10

## 11 70 **Exposure Assessment**

12  
13  
14 71 Each participant's address (either rural county or urban district) was geocoded into  
15  
16  
17 72 latitude and longitude data. We identified all air monitors located within 10 kilometers from  
18  
19  
20 73 the participants' addresses (**Table S1**). These monitors were mandated to be away from  
21  
22  
23 74 major roads, industrial sources, buildings, or residential sources of emissions from the  
24  
25  
26 75 combustion of coal, waste, or oil so that the measurements from these monitors were more  
27  
28  
29 76 likely to reflect the background air pollution level rather than those from local sources, such  
30  
31  
32 77 as traffic or industrial combustion. The measurements from these monitors strictly followed  
33  
34  
35 78 the methodological standards set by the State Environmental Protection Administration of  
36  
37  
38 79 China. For each participant, daily-specific PM<sub>2.5</sub> data measured at the nearest monitors to  
39  
40  
41 80 their residence was used to estimate PM<sub>2.5</sub> exposure. The 1-year average concentration  
42  
43  
44 81 before the medical examination was calculated and treated as an indicator of long-term  
45  
46  
47 82 exposure to PM<sub>2.5</sub>.

## 48 83 **Statistical Analysis**

49  
50  
51 84 Continuous variables were reported as means with standard deviation; categorical  
52  
53  
54 85 variables were presented as percentages. We modeled SBP and DBP using linear  
55  
56  
57 86 regressions with township-specific random intercepts to investigate the independent effect of  
58  
59  
60 87 long-term exposure to PM<sub>2.5</sub> on these two blood pressure measures. We also developed  
88  
89  
90 88 generalized linear models with a logit link function and township-specific random intercepts

1  
2  
3  
4 89 to assess the association of long-term exposure to PM<sub>2.5</sub> with hypertension prevalence. For  
5  
6  
7 90 each of these analyses, we started with a model (Model 1) which only included age and sex.  
8  
9 91 We then incrementally adjusted for additional covariates. The second model (Model 2)  
10  
11 92 included Model 1 and socioeconomic factors (education level and urbanity). The third model  
12  
13 93 (Model 3) included Model 2 and cardiovascular disease risk factors (BMI, smoking status,  
14  
15 94 alcohol consumption, and diabetes). Models of blood pressure were additionally controlled  
16  
17 95 for hypertensive medication use; while models of hypertension were not, as hypertension  
18  
19 96 medication use was a component of the outcome definition.  
20  
21  
22  
23

24 97 We also used restricted cubic splines to graphically characterize the concentration-  
25  
26 98 response (C-R) relationships of PM<sub>2.5</sub> exposure with blood pressure and hypertension  
27  
28 99 prevalence.<sup>24</sup> Additionally, to examine effect modification by age, gender, smoking status,  
29  
30 100 alcohol consumption, diabetes, and obesity, each potential modifier was tested by adding an  
31  
32 101 interaction term in the regression model separately and testing its statistical significance as  
33  
34 102 well as the association per categories of the tested variable through subgroup analyses.  
35  
36  
37  
38  
39

40 103 Analyses were conducted with SAS version 9.4, 64-bit Windows (SAS Institute Inc.,  
41  
42 104 Cary, North Carolina). All tests of significance were 2-tailed, with a level of significance set at  
43  
44 105 an alpha of 0.05.  
45  
46  
47  
48  
49

50 106

## 51 107 **RESULT**

### 52 108 **Study population and baseline characteristics**

53  
54  
55 109 A total of 883,827 participants were included in the study sample. Summary statistics  
56  
57 110 and baseline characteristics of the study population are shown in **Table S2**. The mean age  
58  
59  
60

1  
2  
3  
4 111 was 55.5 years, 60.4% were women, 43.1% had hypertension, mean SBP was 143.5 mmHg,  
5  
6 112 mean DBP was 83.1 mmHg, and 19.4% were taking antihypertensive medications. The 1-  
7  
8  
9 113 year PM<sub>2.5</sub> exposure of total study population ranged from 8.8 to 93.8 µg/m<sup>3</sup>. There were  
10  
11  
12 114 864,119 (97.8%), 842,356 (95.3%), and 706,415 (79.9%) participants with 1-year PM<sub>2.5</sub>  
13  
14 115 exposure higher than 15 µg/m<sup>3</sup> [World Health Organization (WHO) Interim Target 3 (IT-1)],  
15  
16  
17 116 25 µg/m<sup>3</sup> [WHO Interim Target 2 (IT-2)], and 35 µg/m<sup>3</sup> [WHO Interim Target 3 (IT-3)],  
18  
19  
20 117 respectively.

118

### 119 **Associations of long-term PM<sub>2.5</sub> exposure with hypertension prevalence**

120 We found a positive association of long-term PM<sub>2.5</sub> exposure with hypertension  
121 prevalence, which was consistent across different model specifications. In the crude model  
122 (Model 1), each 10 µg/m<sup>3</sup> increase in PM<sub>2.5</sub> was associated with an 10% increased odds of  
123 hypertension prevalence [odds ratio (OR): 1.10; 95% confidence interval (CI): 1.09-1.11].  
124 After adjusting for a wide range of potential confounders, the OR of hypertension was 1.09  
125 (95% CI: 1.08-1.10) for each 10 µg/m<sup>3</sup> increase in PM<sub>2.5</sub>. (**Table S3**) The C-R relationships  
126 between long-term PM<sub>2.5</sub> exposure and hypertension prevalence were nonlinear with steeper  
127 slopes at higher PM<sub>2.5</sub> exposure levels. Compared to individuals with the lowest level of  
128 PM<sub>2.5</sub> exposure (8.8 µg/m<sup>3</sup>), the adjusted ORs for hypertension of individuals with 15, 25, and  
129 35 µg/m<sup>3</sup> of PM<sub>2.5</sub> exposure were 1.01 (95% CI: 1.01-1.02), 1.03 (95% CI: 1.02-1.04), and  
130 1.05 (95% CI: 1.03-1.07), respectively. (**Figure 1**)

131

### 132 **Associations of long-term PM<sub>2.5</sub> exposure with systolic and diastolic blood pressure**

1  
2  
3  
4 133 PM<sub>2.5</sub> exposures were positively associated with SBP and DBP. Adjustment for  
5  
6 134 antihypertensive medications led to small increase in the effect estimate of PM<sub>2.5</sub> exposure.  
7  
8  
9 135 Among potentially confounding variables, adjustment for cardiovascular disease risk factors  
10  
11 136 (Model 3 vs. Model 2) had the largest impact on effect estimates with a decrease in the  
12  
13  
14 137 positive association with SBP and DBP. In the fully adjusted model (Model 4), each 10 µg/m<sup>3</sup>  
15  
16  
17 138 increment was associated with increases of 0.50 mmHg (95% CI: 0.41-0.59) in SBP and  
18  
19 139 0.23 mmHg (95% CI: 0.18-0.28) in DBP. (**Table S4**) We found that the shapes of the C-R  
20  
21  
22 140 associations of PM<sub>2.5</sub> exposure with SBP and DBP were different, as presented in **Figure 2**.  
23  
24  
25 141 For SBP, the fitted C-R functions had upward trends with greater effect estimates of PM<sub>2.5</sub>  
26  
27 142 at higher concentrations. For DBP, the C-R relationships were generally U-shaped.  
28  
29  
30 143

#### 31 32 144 **Stratified analysis and effect modification**

33  
34  
35 145 The associations of long-term PM<sub>2.5</sub> exposure with hypertension and blood pressure  
36  
37 146 across different subgroups are provided in **Figure 3** and **Figure 4**. The associations of PM<sub>2.5</sub>  
38  
39  
40 147 exposure with hypertension were stronger among the elderly (≥65 years of age), men, and  
41  
42  
43 148 non-current smokers compared with younger subjects, women, and current smokers,  
44  
45 149 respectively. Gender significantly modified the effects of PM<sub>2.5</sub> exposure on all three  
46  
47  
48 150 outcomes (all p for interaction <0.05) with stronger associations among men; while these  
49  
50  
51 151 associations were not modified by alcohol consumption (all p for interaction >0.05). Although  
52  
53 152 age and smoking status were also found to be effect modifiers in the associations of PM<sub>2.5</sub>  
54  
55  
56 153 exposure with SBP, DBP, and hypertension, the impacts of the two effect modifiers on these  
57  
58 154 associations differed depending on the outcome. We observed greater effect estimates of  
59  
60



1  
2  
3  
4 155 PM<sub>2.5</sub> exposure for SBP and hypertension, while smaller estimates for DBP among the  
5  
6  
7 156 elderly (≥65 years of age) and non-current smokers.  
8

9 157

## 11 158 **DISCUSSION**

13  
14 159 In this study, we investigated the associations between long-term exposure to PM<sub>2.5</sub> and  
15  
16  
17 160 hypertension prevalence, SBP, and DBP. We found that PM<sub>2.5</sub> was associated with  
18  
19  
20 161 increased risk of hypertension prevalence and elevation of blood pressure. Nonlinearity in  
21  
22 162 these associations was also observed. With increasing higher PM<sub>2.5</sub> concentrations, the C-R  
23  
24  
25 163 curves for PM<sub>2.5</sub>–hypertension and PM<sub>2.5</sub>–SBP showed consistent increase with steeper  
26  
27 164 slopes at higher PM<sub>2.5</sub> concentrations; while the C-R curve for PM<sub>2.5</sub>–DBP was U-shaped.  
28  
29  
30 165 The elderly, men, and non-current smokers appeared to be more vulnerable to the exposure  
31  
32  
33 166 of PM<sub>2.5</sub>.

34  
35 167 Our study contributes to the existing scientific literature in several ways. First, the large  
36  
37  
38 168 size of our study allowed us to comprehensively assess the associations of PM<sub>2.5</sub> with  
39  
40  
41 169 hypertension prevalence and blood pressure among a wide spectrum of population in China.  
42  
43 170 Our study included 0.8 million participants aged 35–75 years across a large and  
44  
45  
46 171 geographically diverse country, making the results more generalizable. In addition, the large  
47  
48  
49 172 population included in the present study also reflected different PM<sub>2.5</sub> exposure levels, and  
50  
51  
52 173 thus it adds to our understanding about these associations across a wider range of PM<sub>2.5</sub>  
53  
54 174 concentrations (8.8–93.8 µg/m<sup>3</sup>) than reported previously.<sup>5-14</sup> Furthermore, the large sample  
55  
56  
57 175 size, especially the large number of participants with hypertension and high level of PM<sub>2.5</sub>  
58  
59 176 exposure (e.g. >35 µg/m<sup>3</sup>), enabled us to examine these associations with greater precision  
60

1  
2  
3  
4 177 and sufficient statistical power.  
5

6 178 Second, we provided new information on the C-R relationship between long-term PM<sub>2.5</sub>  
7  
8  
9 179 exposure and hypertension prevalence. Previous research reported a U-shaped relationship  
10  
11  
12 180 between long-term exposure to PM<sub>2.5</sub> and hypertension prevalence with a threshold PM<sub>2.5</sub> of  
13  
14 181 47.9 µg/m<sup>3</sup>.<sup>5</sup> However, in our study, we found no evidence of a discernible threshold — the  
15  
16  
17 182 concentration at which the C-R functions of hypertension prevalence begin to flatten out —  
18  
19 183 at concentrations ranging from as low as 8.8 µg/m<sup>3</sup> to as high as 93.8 µg/m<sup>3</sup>. In fact, PM<sub>2.5</sub>  
20  
21  
22 184 exposure was associated with consistent high risk of hypertension throughout the entire  
23  
24  
25 185 exposure range and the effects became even more pronounced when PM<sub>2.5</sub> exposure was  
26  
27 186 extended to higher levels. This result suggests that per unit decrease in the concentration of  
28  
29  
30 187 PM<sub>2.5</sub> can be translated to a greater reduction in excess hypertension prevalence in highly  
31  
32  
33 188 polluted regions compared with regions with low to moderate levels of PM<sub>2.5</sub> exposure.  
34

35 189 Third, we found evidence of nonlinearity relationship of PM<sub>2.5</sub> exposure with blood  
36  
37  
38 190 pressure, including SBP and DBP. Interestingly, the shapes of nonlinear C-R association  
39  
40  
41 191 were different between PM<sub>2.5</sub> exposure-SBP and PM<sub>2.5</sub> exposure-DBP associations.  
42  
43 192 Although we observed a modest-sized change of blood pressure across the full range of  
44  
45  
46 193 PM<sub>2.5</sub> concentrations, it is still of great public health importance. Since hypertension is the  
47  
48  
49 194 most important risk factor for death, even a small change in blood pressure at population  
50  
51  
52 195 level can potentially lead to an increase in attributable disease burden.<sup>25</sup> The mechanism by  
53  
54  
55 196 which the shapes between the associations of PM<sub>2.5</sub> exposure-SBP vs. PM<sub>2.5</sub> exposure-DBP  
56  
57  
58 197 are different is unclear. Pathophysiological changes, such as systemic inflammation,  
59  
60 198 atherosclerosis, endothelial dysfunction, and increased arterial stiffness,<sup>4,26</sup> may have

1  
2  
3  
4 199 contributed to the observed patterns. The increased arterial stiffness induced by PM<sub>2.5</sub> would  
5  
6  
7 200 initially lead to elevation in SBP and decline in DBP, creating an increased pulse pressure.<sup>27</sup>  
8  
9 201 While with further increase of arterial stiffness, the heart rates got higher to maintain the  
10  
11 202 stroke volume, which could result in the rise of DBP afterwards. In addition, prior studies  
12  
13  
14 203 have reported the effects of PM<sub>2.5</sub> exposure on pulse pressures showing a tendency of rising  
15  
16  
17 204 up first and then declining at higher PM<sub>2.5</sub> levels, which partially supports this hypothesis.<sup>11,28</sup>  
18

19 205 Fourth, we identified the vulnerable subgroups to the exposure of PM<sub>2.5</sub>. In stratified  
20  
21 206 analyses, we observed the large effect estimates of PM<sub>2.5</sub> on hypertension among the  
22  
23  
24 207 elderly. Elderly subjects may commonly represent higher prevalence of preexisting  
25  
26  
27 208 cardiovascular and respiratory diseases, which may confer susceptibility to PM<sub>2.5</sub>. Also, the  
28  
29  
30 209 results showed that PM<sub>2.5</sub> exposure had larger effects on hypertension in men, which is  
31  
32  
33 210 consistent with a previous study.<sup>6</sup> Such increased susceptibility may be related to sex-  
34  
35  
36 211 related differences in the deposition localization and rates of air pollutants;<sup>29</sup> specifically,  
37  
38 212 men have larger airways and slightly lower airway reactivity.<sup>30</sup> Additionally, smoking status  
39  
40  
41 213 was found to be an effect modifier with smaller effects on hypertension among current  
42  
43  
44 214 smokers. This finding is also supported by prior research.<sup>10,28</sup> One possible explanation is  
45  
46  
47 215 that smoking and PM<sub>2.5</sub> exposure may share the same pathways in mediating cardiovascular  
48  
49  
50 216 effects and smoking may play a dominant role in smokers. Thus, the exposure to PM<sub>2.5</sub>  
51  
52  
53 217 might not exert additional harmful effect via the same pathway.<sup>28</sup>

54 218 Our study should also be interpreted in the context of several limitations. First, given the  
55  
56 219 nature of the cross-sectional study design, the causal relationship could not be established.  
57  
58  
59 220 Additional research is needed to examine these relationships in a prospective manner.  
60

1  
2  
3  
4 221 Second, a selection bias is possible because our analysis was restricted to participants with  
5  
6 222 available PM<sub>2.5</sub> data. Third, while we included a number of potential confounders in the  
7  
8  
9 223 analyses, there might be unmeasured confounders that affected the observed associations.  
10  
11 224 In particular, we were unable to control for other confounders such as diet and physical  
12  
13  
14 225 activity, because these data were only available in a subset of the China PEACE Million  
15  
16  
17 226 Persons Project cohort. Fourth, for PM<sub>2.5</sub> exposure assessment, we used the data from the  
18  
19 227 monitor located nearest to the residence of each subject and did not account for individual  
20  
21  
22 228 time-activity patterns and indoor-related characteristics, which would likely result in  
23  
24  
25 229 nondifferential measurement errors and may cause underestimates in our results<sup>31</sup>.  
26  
27 230 However, this approach is commonly used in prior studies<sup>31</sup> and previous research have  
28  
29  
30 231 indicated that PM<sub>2.5</sub> exposure estimated by the nearest monitor was highly correlated with  
31  
32  
33 232 other sophisticated approaches<sup>32</sup>. Fifth, other gaseous pollutants, such as NO<sub>x</sub> and ozone,  
34  
35 233 temperature, and noise were not included in this study. As a result, we were not able to  
36  
37  
38 234 determine whether the observed effects were specifically attributable to PM<sub>2.5</sub> or to the  
39  
40  
41 235 combined effects of these factors.

42  
43 236 In conclusion, our study demonstrated that long-term exposure to PM<sub>2.5</sub> was significantly  
44  
45 237 associated with increased risk of blood pressure elevation and hypertension prevalence. The  
46  
47  
48 238 effect of PM<sub>2.5</sub> on hypertension prevalence was more pronounced at higher PM<sub>2.5</sub>  
49  
50  
51 239 concentration. Our findings reinforce the need to develop comprehensive strategies for  
52  
53  
54 240 addressing air pollution problems, especially for areas with severe air pollution.

55 241  
56  
57  
58  
59  
60

## 242 **ACKNOWLEDGMENTS**

243 We thank all study individuals for their participation and appreciate the contributions  
244 made by project teams at the National Center for Cardiovascular Diseases in the realms of  
245 project design and operations, particularly data collection.

## 247 **PATIENT AND PUBLIC INVOLVEMENT**

248 Patients and/or the public were not involved in the design, or conduct, or reporting, or  
249 dissemination plans of this research.

## 251 **FUNDING SOURCES**

252 This project was supported by the National Key Research and Development Program  
253 (2016YFE0103800) from the Ministry of Science and Technology of China, the CAMS  
254 Innovation Fund for Medical Science (2016-I2M-1-006), the Major Public Health Service  
255 Project from the Ministry of Finance and National Health and Family Planning Commission of  
256 China and the 111 Project (B16005) from the Ministry of Education of China.

## 258 **DISCLOSURES**

259 All authors have completed and submitted the ICMJE Form for Disclosure of Potential  
260 Conflicts of Interest and declared no competing interests.

## 262 **CONTRIBUTORS**

263 JS and XZ conceived of this article. JS and YG wrote the manuscript with further

1  
2  
3  
4 264 contributions from XZ, XL, EM, MR, GT, DZ, WZ, JL and MA. JS and SH completed all the  
5  
6  
7 265 statistical analysis. All authors interpreted data, contributed to critical revisions and approved  
8  
9 266 the final version of the article.  
10  
11  
12 267  
13  
14 268  
15  
16  
17  
18  
19  
20  
21  
22  
23  
24  
25  
26  
27  
28  
29  
30  
31  
32  
33  
34  
35  
36  
37  
38  
39  
40  
41  
42  
43  
44  
45  
46  
47  
48  
49  
50  
51  
52  
53  
54  
55  
56  
57  
58  
59  
60

For peer review only

269 **REFERENCES**

- 270 1. Stanaway JD, Afshin A, Gakidou E, et al. Global, regional, and national comparative  
271 risk assessment of 84 behavioural, environmental and occupational, and metabolic  
272 risks or clusters of risks for 195 countries and territories, 1990-2017: a systematic  
273 analysis for the Global Burden of Disease Study 2017. *Lancet (London, England)*.  
274 2018;392(10159):1923-1994.
- 275 2. Mills KT, Bundy JD, Kelly TN, et al. Global Disparities of Hypertension Prevalence and  
276 Control. *Circulation*. 2016;134(6):441-450.
- 277 3. Rajagopalan S, Al-Kindi SG, Brook RD. Air Pollution and Cardiovascular Disease:  
278 JACC State-of-the-Art Review. *J Am Coll Cardiol*. 2018;72(17):2054-2070.
- 279 4. Carey RM, Muntner P, Bosworth HB, Whelton PK. Prevention and Control of  
280 Hypertension: JACC Health Promotion Series. *J Am Coll Cardiol*. 2018;72(11):1278-  
281 1293.
- 282 5. Xie X, Wang Y, Yang Y, et al. Long-Term Effects of Ambient Particulate Matter (With  
283 an Aerodynamic Diameter  $\leq 2.5$   $\mu\text{m}$ ) on Hypertension and Blood Pressure and  
284 Attributable Risk Among Reproductive-Age Adults in China. *Journal of the American*  
285 *Heart Association*. 2018;7(9).
- 286 6. Li N, Chen G, Liu F, et al. Associations between long-term exposure to air pollution  
287 and blood pressure and effect modifications by behavioral factors. *Environmental*  
288 *research*. 2020;182:109109.
- 289 7. Dong GH, Qian ZM, Xaverius PK, et al. Association between long-term air pollution  
290 and increased blood pressure and hypertension in China. *Hypertension (Dallas, Tex :*

- 1  
2  
3  
4 291 1979). 2013;61(3):578-584.  
5  
6  
7 292 8. Liu C, Chen R, Zhao Y, et al. Associations between ambient fine particulate air  
8  
9 293 pollution and hypertension: A nationwide cross-sectional study in China. *The Science*  
10  
11 294 *of the total environment*. 2017;584-585:869-874.  
12  
13  
14 295 9. Fuks K, Moebus S, Hertel S, et al. Long-term urban particulate air pollution, traffic noise,  
15  
16 296 and arterial blood pressure. *Environmental health perspectives*. 2011;119(12):1706-  
17  
18 297 1711.  
19  
20  
21  
22 298 10. Fuks KB, Weinmayr G, Foraster M, et al. Arterial blood pressure and long-term  
23  
24 299 exposure to traffic-related air pollution: an analysis in the European Study of Cohorts  
25  
26 300 for Air Pollution Effects (ESCAPE). *Environmental health perspectives*.  
27  
28 301 2014;122(9):896-905.  
29  
30  
31  
32 302 11. Honda T, Pun VC, Manjourides J, Suh H. Associations of long-term fine particulate  
33  
34 303 matter exposure with prevalent hypertension and increased blood pressure in older  
35  
36 304 Americans. *Environmental research*. 2018;164:1-8.  
37  
38  
39  
40 305 12. Schwartz J, Alexeeff SE, Mordukhovich I, et al. Association between long-term  
41  
42 306 exposure to traffic particles and blood pressure in the Veterans Administration  
43  
44 307 Normative Aging Study. *Occupational and environmental medicine*. 2012;69(6):422-  
45  
46 308 427.  
47  
48  
49  
50 309 13. Sorensen M, Hoffmann B, Hvidberg M, et al. Long-term exposure to traffic-related air  
51  
52 310 pollution associated with blood pressure and self-reported hypertension in a Danish  
53  
54 311 cohort. *Environmental health perspectives*. 2012;120(3):418-424.  
55  
56  
57  
58 312 14. Chan SH, Van Hee VC, Bergen S, et al. Long-Term Air Pollution Exposure and Blood  
59  
60



- 1  
2  
3  
4 313 Pressure in the Sister Study. *Environmental health perspectives*. 2015;123(10):951-  
5  
6 314 958.  
7  
8  
9 315 15. Cohen AJ, Brauer M, Burnett R, et al. Estimates and 25-year trends of the global  
10  
11 316 burden of disease attributable to ambient air pollution: an analysis of data from the  
12  
13 317 Global Burden of Diseases Study 2015. *The Lancet*. 2017;389(10082):1907-1918.  
14  
15  
16 318 16. Kato N. Ethnic differences in genetic predisposition to hypertension. 2012;35(6):574-  
17  
18 319 581.  
19  
20  
21 320 17. Curto A, Wellenius GA, Milà C, et al. Ambient Particulate Air Pollution and Blood  
22  
23 321 Pressure in Peri-urban India. *Epidemiology (Cambridge, Mass)*. 2019;30(4):492-500.  
24  
25  
26 322 18. Kearney PM, Whelton M, Reynolds K, Muntner P, Whelton PK, He J. Global burden of  
27  
28 323 hypertension: analysis of worldwide data. *Lancet (London, England)*.  
29  
30 324 2005;365(9455):217-223.  
31  
32  
33 325 19. Kaufman JD, Adar SD, Barr RG, et al. Association between air pollution and coronary  
34  
35 326 artery calcification within six metropolitan areas in the USA (the Multi-Ethnic Study of  
36  
37 327 Atherosclerosis and Air Pollution): a longitudinal cohort study. *Lancet (London,*  
38  
39 328 *England)*. 2016;388(10045):696-704.  
40  
41  
42 329 20. James PA, Oparil S, Carter BL, et al. 2014 evidence-based guideline for the  
43  
44 330 management of high blood pressure in adults: report from the panel members  
45  
46 331 appointed to the Eighth Joint National Committee (JNC 8). *Jama*. 2014;311(5):507-  
47  
48 332 520.  
49  
50  
51 333 21. Chobanian AV, Bakris GL, Black HR, et al. The Seventh Report of the Joint National  
52  
53 334 Committee on Prevention, Detection, Evaluation, and Treatment of High Blood  
54  
55  
56  
57  
58  
59  
60

- 1  
2  
3  
4 335 Pressure: the JNC 7 report. *JAMA*. 2003;289(19):2560-2572.  
5  
6 336 22. Liu LS, Writing Group of Chinese Guidelines for the Management of H. [2010 Chinese  
7  
8  
9 337 guidelines for the management of hypertension]. *Zhonghua xin xue guan bing za zhi*.  
10  
11 338 2011;39(7):579-615.  
12  
13  
14 339 23. Zhou BF. Predictive values of body mass index and waist circumference for risk factors  
15  
16 340 of certain related diseases in Chinese adults--study on optimal cut-off points of body  
17  
18 341 mass index and waist circumference in Chinese adults. *Biomedical and environmental*  
19  
20 342 *sciences : BES*. 2002;15(1):83-96.  
21  
22  
23  
24 343 24. Desquilbet L, Mariotti F. Dose - response analyses using restricted cubic spline  
25  
26 344 functions in public health research. *Statistics in medicine*. 2010;29(9):1037-1057.  
27  
28  
29 345 25. Chobanian AV, Bakris GL, Black HR, et al. Seventh report of the Joint National  
30  
31 346 Committee on Prevention, Detection, Evaluation, and Treatment of High Blood  
32  
33 347 Pressure. *Hypertension (Dallas, Tex : 1979)*. 2003;42(6):1206-1252.  
34  
35  
36  
37 348 26. Zanolli L, Lentini P, Granata A, et al. A systematic review of arterial stiffness, wave  
38  
39 349 reflection and air pollution. *Molecular Medicine Reports*. 2017;15(5):3425-3429.  
40  
41  
42 350 27. Bavishi C, Goel S, Messerli FH. Isolated systolic hypertension: an update after SPRINT.  
43  
44 351 *The American journal of medicine*. 2016;129(12):1251-1258.  
45  
46  
47  
48 352 28. Zhang Z, Guo C, Lau AKH, et al. Long-Term Exposure to Fine Particulate Matter, Blood  
49  
50 353 Pressure, and Incident Hypertension in Taiwanese Adults. *Environmental health*  
51  
52 354 *perspectives*. 2018;126(1):017008.  
53  
54  
55  
56 355 29. Sacks JD, Stanek LW, Luben TJ, et al. Particulate matter-induced health effects: who  
57  
58 356 is susceptible? *Environmental health perspectives*. 2011;119(4):446-454.  
59  
60

- 1  
2  
3  
4 357 30. Yunginger JW, Reed CE, O'Connell EJ, Melton L, O'Fallon WM, Silverstein MD. A  
5  
6 358 community-based study of the epidemiology of asthma. *Am Rev Respir Dis.*  
7  
8  
9 359 1992;146(4):888-894.  
10  
11 360 31. Li H, Cai J, Chen R, et al. Particulate matter exposure and stress hormone levels: a  
12  
13  
14 361 randomized, double-blind, crossover trial of air purification. *Circulation.*  
15  
16  
17 362 2017;136(7):618-627.  
18  
19 363 32. Miller KA, Spalt EW, Gasset AJ, et al. Estimating ambient-origin PM2.5 exposure for  
20  
21  
22 364 epidemiology: observations, prediction, and validation using personal sampling in the  
23  
24  
25 365 Multi-Ethnic Study of Atherosclerosis. *Journal of exposure science & environmental*  
26  
27 366 *epidemiology.* 2019;29(2):227-237.  
28  
29  
30 367  
31  
32 368

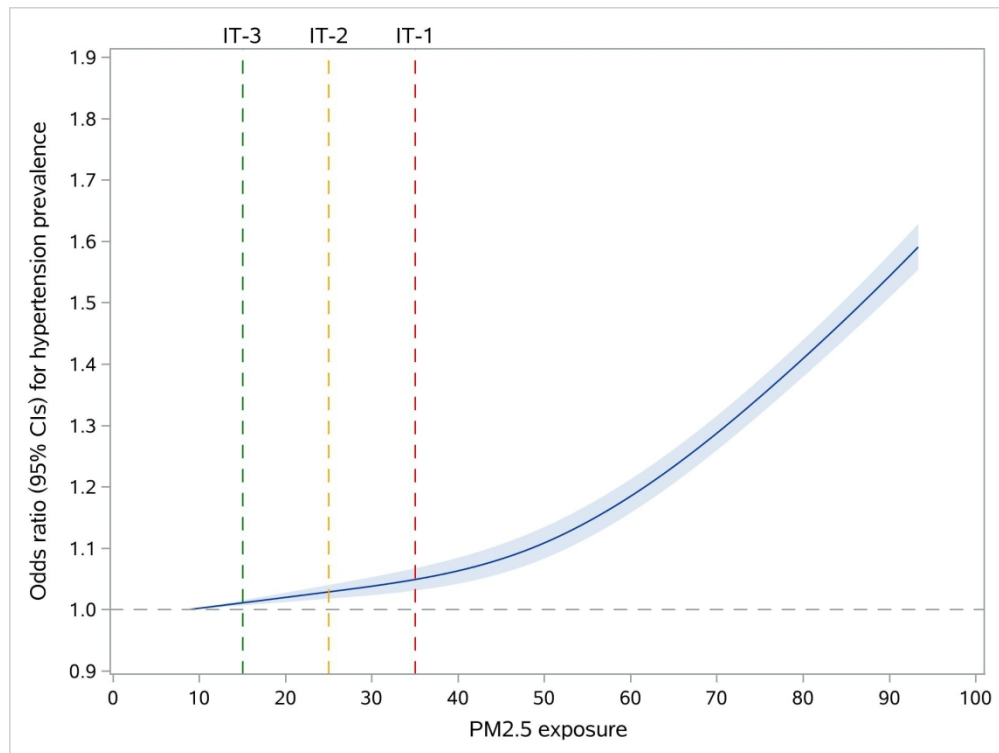

Figure 1. Concentration-response functions of the long-term exposure to PM2.5 with hypertension prevalence.

Effect estimates were presented as adjusted odds ratios for hypertension prevalence compared to individuals with PM2.5 exposure 8.8 µg/m<sup>3</sup>.

The dashed lines represent the air-quality standards for annual average concentrations of PM2.5 according to the World Health Organization (WHO) Interim Target 1 (IT-1), WHO Interim Target 2 (IT-2), WHO Interim Target 3 (IT-3).

Covariates used within the multivariate-adjusted models included age, sex, education level, urbanity, smoking status, alcohol consumption, obesity, and diabetes

169x127mm (300 x 300 DPI)

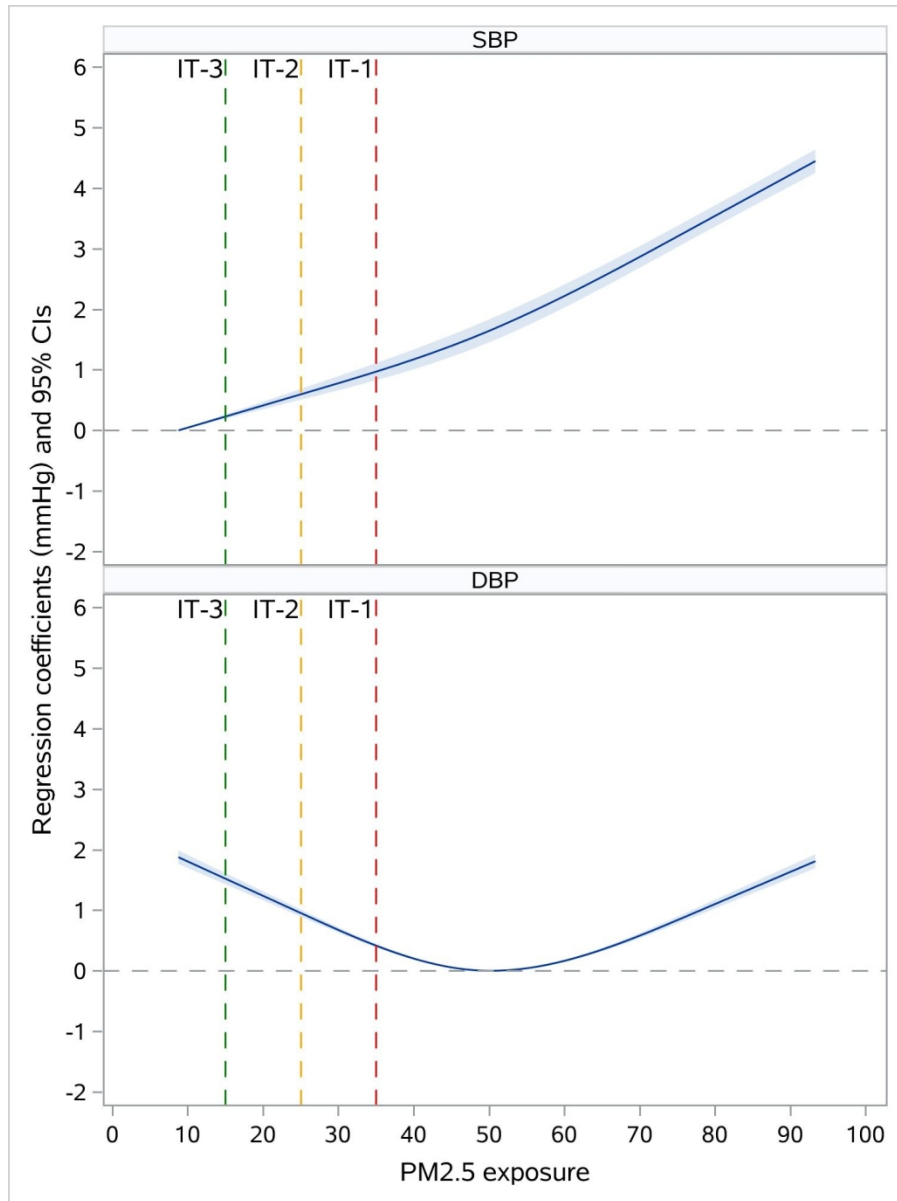

Figure 2. Concentration-response functions of the long-term exposure to PM<sub>2.5</sub> with systolic blood pressure (SBP) and diastolic blood pressure (DBP). Effect estimates (regression coefficients) were presented as changes in SBP compared to individuals with PM<sub>2.5</sub> exposure 8.8 µg/m<sup>3</sup> and changes in DBP compared to individuals with PM<sub>2.5</sub> exposure 50 µg/m<sup>3</sup>. The dashed lines represent the air-quality standards for annual average concentrations of PM<sub>2.5</sub> according to the World Health Organization (WHO) Interim Target 1 (IT-1), WHO Interim Target 2 (IT-2), WHO Interim Target 3 (IT-3).

Covariates used within the multivariate-adjusted models included age, sex, education level, urbanity, smoking status, alcohol consumption, obesity, diabetes, and use of antihypertensive medications.

127x169mm (300 x 300 DPI)

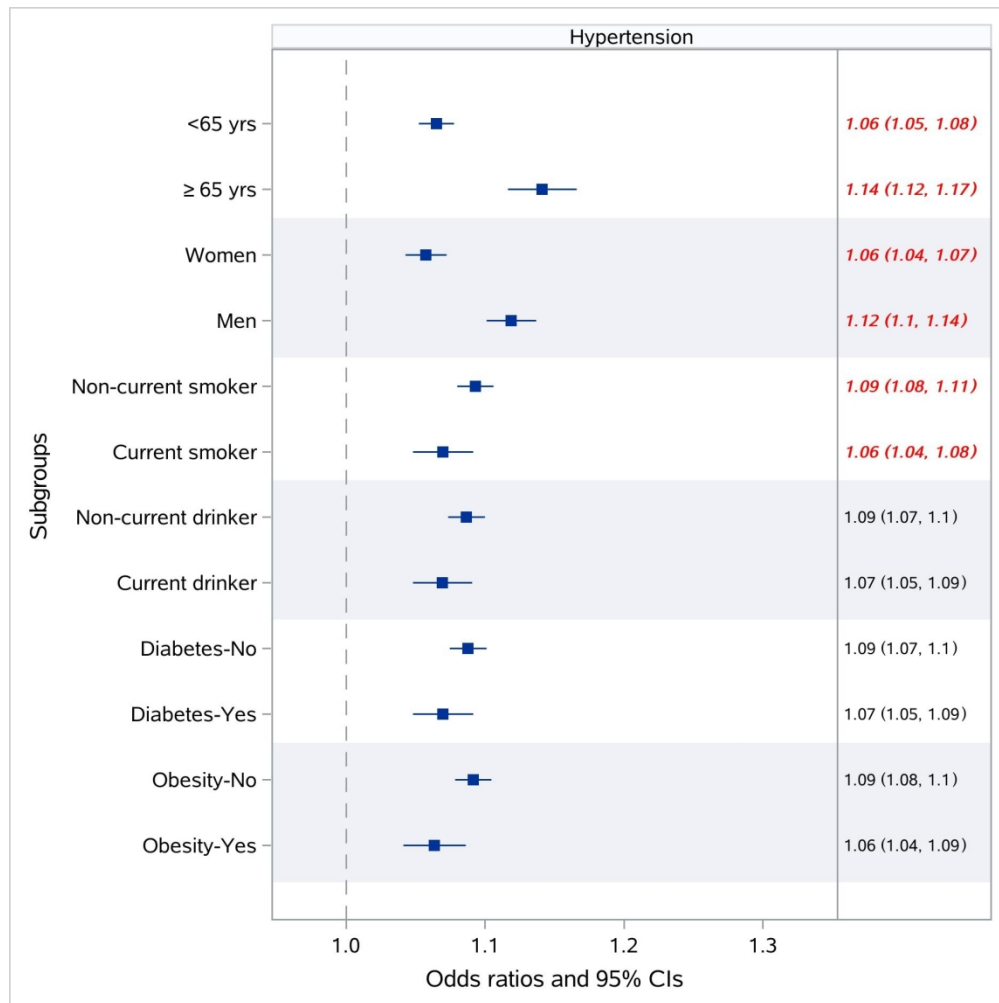

Figure 3. Stratified analysis of the association of long-term exposure to PM2.5 with hypertension prevalence  
 Red texts with italics indicated that p-value for interaction terms < 0.05.  
 Effect estimates (regression coefficients) were presented as adjusted odds ratios for hypertension prevalence for each 10 µg/m<sup>3</sup> increment in the 1-year PM2.5 exposure.  
 Covariates used within the multivariate-adjusted models included age, sex, education level, urbanity, smoking status, alcohol consumption, obesity and diabetes.

158x158mm (300 x 300 DPI)

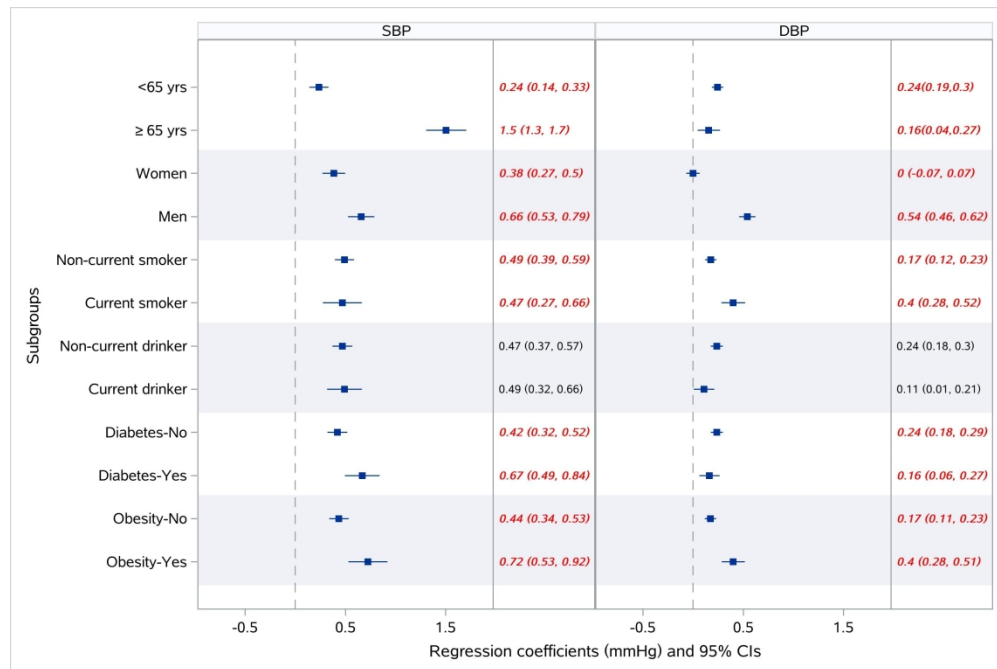

Figure 4. Stratified analysis of the association of long-term exposure to PM<sub>2.5</sub> with blood pressure

Red texts with italics indicated that p-value for interaction terms < 0.05.

Effect estimates (regression coefficients) were presented as changes in systolic blood pressure (SBP) or diastolic blood pressure (DBP) for each 10 µg/m<sup>3</sup> increment in the 1-year PM<sub>2.5</sub> exposure deriving from multivariable linear regression. Covariates used within the multivariate-adjusted models included age, sex, education level, urbanity, smoking status, alcohol consumption, obesity, diabetes, and use of antihypertensive medications.

238x158mm (300 x 300 DPI)

## 1 APPENDICES

2 Table S1. Summary statistics for daily PM<sub>2.5</sub> (µg/m<sup>3</sup>) at 83 monitoring stations in China  
3 between 2015 and 2018.

| Station | Mean  | Median | P25 | P75  | Maximum | Minimum | SD    | Missing (days) |
|---------|-------|--------|-----|------|---------|---------|-------|----------------|
| 1       | 67.90 | 50     | 26  | 88   | 540     | 5       | 62.47 | 22             |
| 2       | 65.48 | 48     | 23  | 85   | 515     | 3       | 61.39 | 25             |
| 3       | 56.39 | 40     | 19  | 76   | 448     | 2       | 53.72 | 18             |
| 4       | 69.26 | 50     | 27  | 88   | 529     | 4       | 65.93 | 10             |
| 5       | 57.73 | 41     | 20  | 77   | 446     | 4       | 54.56 | 9              |
| 6       | 64.46 | 51     | 32  | 79.5 | 350     | 6       | 49.30 | 13             |
| 7       | 62.85 | 50     | 30  | 78   | 409     | 4       | 50.02 | 38             |
| 8       | 68.35 | 54     | 34  | 83.5 | 408     | 7       | 54.03 | 37             |
| 9       | 64.46 | 51     | 32  | 79.5 | 350     | 6       | 49.30 | 13             |
| 10      | 65.52 | 51     | 32  | 81   | 410     | 7       | 52.07 | 34             |
| 11      | 86.31 | 61     | 38  | 107  | 708     | 5       | 77.17 | 37             |
| 12      | 63.99 | 52     | 37  | 76   | 421     | 6       | 43.18 | 18             |
| 13      | 61.01 | 50     | 30  | 79   | 290     | 2       | 44.39 | 24             |
| 14      | 60.51 | 49     | 32  | 76   | 390     | 7       | 42.41 | 70             |
| 15      | 46.19 | 40     | 29  | 55   | 276     | 7       | 26.03 | 44             |
| 16      | 22.90 | 18     | 12  | 29   | 187     | 3       | 17.44 | 59             |
| 17      | 54.55 | 41     | 26  | 68   | 932     | 3       | 48.40 | 14             |
| 18      | 40.93 | 32     | 20  | 50   | 450     | 5       | 32.88 | 16             |
| 19      | 44.97 | 35     | 22  | 56   | 353     | 6       | 35.16 | 39             |
| 20      | 48.80 | 37     | 24  | 59   | 508     | 6       | 42.08 | 15             |
| 21      | 45.30 | 31     | 19  | 55   | 612     | 3       | 45.58 | 27             |
| 22      | 30.54 | 22     | 14  | 39   | 308     | 2       | 26.22 | 17             |
| 23      | 45.36 | 34     | 21  | 58   | 378     | 3       | 36.92 | 24             |
| 24      | 54.24 | 33     | 21  | 66   | 730     | 5       | 59.99 | 24             |
| 25      | 39.52 | 29     | 18  | 49   | 502     | 3       | 35.05 | 78             |
| 26      | 42.91 | 36     | 22  | 55   | 235     | 4       | 29.42 | 24             |
| 27      | 44.22 | 36     | 22  | 58   | 225     | 5       | 30.20 | 60             |
| 28      | 44.97 | 38     | 24  | 58   | 218     | 5       | 29.10 | 22             |
| 29      | 44.32 | 37     | 23  | 57   | 224     | 6       | 29.52 | 12             |
| 30      | 49.23 | 40     | 28  | 62   | 271     | 10      | 32.35 | 665            |
| 31      | 52.70 | 42     | 27  | 67   | 284     | 7       | 37.07 | 9              |
| 32      | 51.19 | 43     | 28  | 64   | 250     | 3       | 33.85 | 40             |
| 33      | 49.98 | 44     | 31  | 61   | 259     | 6       | 28.45 | 26             |
| 34      | 47.59 | 40     | 27  | 59   | 233     | 3       | 30.88 | 30             |
| 35      | 27.35 | 25     | 17  | 35   | 114     | 2       | 14.53 | 46             |
| 36      | 26.16 | 22     | 14  | 34   | 233     | 2       | 16.88 | 5              |
| 37      | 32.18 | 25     | 14  | 45   | 155     | 4       | 24.63 | 826            |
| 38      | 45.33 | 40     | 29  | 57   | 209     | 9       | 22.66 | 32             |
| 39      | 49.12 | 44     | 31  | 62   | 356     | 3       | 26.44 | 27             |
| 40      | 74.08 | 60     | 40  | 92   | 431     | 7       | 50.63 | 22             |
| 41      | 56.81 | 46     | 31  | 70   | 327     | 7       | 38.51 | 44             |
| 42      | 70.49 | 57     | 40  | 82   | 514     | 6       | 51.28 | 720            |
| 43      | 56.69 | 46     | 34  | 65   | 257     | 14      | 35.08 | 870            |
| 44      | 69.96 | 53     | 35  | 88   | 548     | 5       | 54.64 | 57             |
| 45      | 62.00 | 50     | 31  | 81   | 275     | 3       | 44.29 | 20             |
| 46      | 44.01 | 38     | 26  | 56   | 195     | 5       | 26.01 | 31             |
| 47      | 48.13 | 43     | 29  | 61   | 478     | 6       | 27.90 | 43             |
| 48      | 51.57 | 43     | 29  | 65   | 289     | 5       | 33.64 | 10             |



|    |    |       |      |    |    |     |    |       |      |
|----|----|-------|------|----|----|-----|----|-------|------|
| 1  |    |       |      |    |    |     |    |       |      |
| 2  |    |       |      |    |    |     |    |       |      |
| 3  | 49 | 39.33 | 33   | 23 | 50 | 214 | 6  | 22.99 | 12   |
| 4  | 50 | 32.84 | 29   | 20 | 42 | 121 | 5  | 17.51 | 22   |
| 5  | 51 | 32.48 | 28   | 18 | 43 | 149 | 5  | 19.23 | 35   |
| 6  | 52 | 27.19 | 24   | 14 | 36 | 120 | 3  | 17.16 | 31   |
| 7  | 53 | 38.01 | 33   | 21 | 49 | 192 | 5  | 23.72 | 16   |
| 8  | 54 | 35.67 | 30   | 19 | 46 | 269 | 3  | 22.90 | 13   |
| 9  | 55 | 50.36 | 42   | 27 | 64 | 286 | 6  | 32.32 | 23   |
| 10 | 56 | 44.34 | 35   | 23 | 56 | 333 | 5  | 32.18 | 6    |
| 11 | 57 | 35.14 | 29   | 16 | 47 | 202 | 3  | 25.68 | 22   |
| 12 | 58 | 22.10 | 18   | 14 | 27 | 123 | 3  | 13.22 | 31   |
| 13 | 59 | 15.14 | 13   | 9  | 18 | 68  | 2  | 9.22  | 12   |
| 14 | 60 | 37.75 | 29   | 18 | 47 | 183 | 5  | 28.96 | 708  |
| 15 | 61 | 49.89 | 41   | 30 | 61 | 222 | 8  | 31.21 | 27   |
| 16 | 62 | 60.72 | 49   | 32 | 77 | 353 | 5  | 42.85 | 8    |
| 17 | 63 | 42.87 | 36   | 24 | 55 | 215 | 5  | 25.98 | 16   |
| 18 | 64 | 49.35 | 40   | 24 | 65 | 235 | 3  | 35.52 | 13   |
| 19 | 65 | 32.64 | 28   | 18 | 42 | 195 | 4  | 20.30 | 23   |
| 20 | 66 | 30.96 | 28   | 21 | 39 | 123 | 7  | 14.39 | 10   |
| 21 | 67 | 29.79 | 28   | 20 | 36 | 102 | 7  | 12.89 | 23   |
| 22 | 68 | 13.86 | 14   | 12 | 15 | 51  | 3  | 5.05  | 109  |
| 23 | 69 | 25.99 | 19   | 13 | 32 | 187 | 5  | 20.21 | 33   |
| 24 | 70 | 24.49 | 19   | 13 | 30 | 124 | 2  | 17.69 | 156  |
| 25 | 71 | 11.95 | 10   | 7  | 15 | 88  | 2  | 7.71  | 87   |
| 26 | 72 | 51.21 | 42   | 30 | 63 | 239 | 10 | 30.49 | 238  |
| 27 | 73 | 10.62 | 9    | 7  | 13 | 73  | 4  | 5.10  | 46   |
| 28 | 74 | 53.80 | 41.5 | 28 | 64 | 328 | 5  | 40.55 | 19   |
| 29 | 75 | 38.88 | 32   | 23 | 47 | 169 | 4  | 24.72 | 27   |
| 30 | 76 | 44.45 | 36   | 24 | 57 | 581 | 4  | 35.96 | 59   |
| 31 | 77 | 44.10 | 36   | 25 | 53 | 287 | 5  | 29.00 | 44   |
| 32 | 78 | 44.04 | 38   | 27 | 56 | 139 | 9  | 23.42 | 1000 |
| 33 | 79 | 55.15 | 45   | 30 | 68 | 363 | 5  | 38.57 | 14   |
| 34 | 80 | 44.69 | 36   | 24 | 55 | 219 | 5  | 30.52 | 50   |
| 35 | 81 | 65.37 | 34   | 20 | 85 | 447 | 5  | 68.86 | 97   |
| 36 | 82 | 57.76 | 29   | 19 | 70 | 414 | 3  | 62.93 | 58   |
| 37 | 83 | 51.70 | 26   | 14 | 65 | 406 | 3  | 58.30 | 42   |

4 Note: Missing: Number of days with missing PM<sub>2.5</sub> value during 2015-2018

5

6 **Table S2. Characteristics of the study population.**

| Variable                                                             | Total<br>(n=883,827) |
|----------------------------------------------------------------------|----------------------|
| <b>Socio-demographics</b>                                            |                      |
| Age, mean (SD), years                                                | 55.5 (10.1)          |
| Female, n (%)                                                        | 533897 (60.4)        |
| Urban residence, n (%)                                               | 657608 (74.4)        |
| Han ethnic group, n (%)                                              | 805479 (91.1)        |
| College or above                                                     | 102764 (11.6)        |
| <b>Regions, n (%)</b>                                                |                      |
| Eastern                                                              | 325253 (36.8)        |
| Central                                                              | 178435 (20.2)        |
| Western                                                              | 311599 (35.3)        |
| NorthEastern                                                         | 68540 (7.8)          |
| <b>Cardiovascular risk factors, n (%)</b>                            |                      |
| Obesity                                                              | 142150 (16.1)        |
| Current drinker                                                      | 194967 (22.1)        |
| Diabetes                                                             | 173950 (19.7)        |
| Current smoker                                                       | 161006 (18.2)        |
| Hypertension                                                         | 381223 (43.1)        |
| <b>Blood pressures</b>                                               |                      |
| Systolic blood pressure, mean (SD)                                   | 143.5 (22.2)         |
| Diastolic blood pressure, mean (SD)                                  | 83.1 (12.3)          |
| <b>PM<sub>2.5</sub> exposures</b>                                    |                      |
| 1-y average PM <sub>2.5</sub> exposure, mean (SD)                    | 49.2 (16.4)          |
| <i>Above WHO Interim Target 1 (IT-1, 35 µg/m<sup>3</sup>), n (%)</i> | 706415 (79.9)        |
| <i>Above WHO Interim Target 2 (IT-2, 25 µg/m<sup>3</sup>), n (%)</i> | 842356 (95.3)        |
| <i>Above WHO Interim Target 3 (IT-3, 15 µg/m<sup>3</sup>), n (%)</i> | 864119 (97.8)        |

7

8 **Table S3. The effect of PM<sub>2.5</sub> exposure on hypertension prevalence.**

| Model                          | Per 10 µg/m <sup>3</sup> PM <sub>2.5</sub> increment |         |
|--------------------------------|------------------------------------------------------|---------|
|                                | OR (95% CI)                                          | p-Value |
| <b>Hypertension prevalence</b> |                                                      |         |
| Model 1                        | 1.10 (1.09-1.11)                                     | <0.001  |
| Model 2                        | 1.10 (1.09-1.11)                                     | <0.001  |
| Model 3                        | 1.09 (1.08-1.10)                                     | <0.001  |

9 Model 1: Included age and sex;

10 Model 2: Model 1 + education level and urbanity;

11 Model 3: Model 2 + smoking status, alcohol consumption, obesity, and diabetes

12 OR: odds ratio; 95% CI: 95% confidence intervals.

13

14 **Table S4. The effect of PM<sub>2.5</sub> exposure on blood pressure.**

| Model                           | Per 10 µg/m <sup>3</sup> PM <sub>2.5</sub> increment |         |
|---------------------------------|------------------------------------------------------|---------|
|                                 | mmHg (95% CI)                                        | p-value |
| <b>Systolic blood pressure</b>  |                                                      |         |
| Model 1                         | 0.58 (0.49-0.67)                                     | <0.001  |
| Model 2                         | 0.57 (0.48-0.66)                                     | <0.001  |
| Model 3                         | 0.45 (0.36-0.54)                                     | <0.001  |
| Model 4                         | 0.50 (0.41-0.59)                                     | <0.001  |
| <b>Diastolic blood pressure</b> |                                                      |         |
| Model 1                         | 0.29 (0.23-0.34)                                     | <0.001  |
| Model 2                         | 0.28 (0.23-0.34)                                     | <0.001  |
| Model 3                         | 0.21 (0.15-0.26)                                     | <0.001  |
| Model 4                         | 0.23 (0.18-0.28)                                     | <0.001  |

15 Model 1: Included age and sex;

16 Model 2: Model 1 + education level and urbanity;

17 Model 3: Model 2 + smoking status, alcohol consumption, obesity, and diabetes

18 Model 4: Model 3 + use of antihypertensive medications

19

20

21

22

23

24

25

26

27

28

29

30

31

32

33

34

35

36

37

38

39

40

41

42

43

44

45

46

47

48

49

50

51

52

53

54

55

56

57

58

59

60

STROBE Statement—Checklist of items that should be included in reports of *cross-sectional studies*

|                              | Item No                                                                            | Recommendation                                                                                                                                                                                    | Page No |
|------------------------------|------------------------------------------------------------------------------------|---------------------------------------------------------------------------------------------------------------------------------------------------------------------------------------------------|---------|
| <b>Title and abstract</b>    | 1                                                                                  | (a) Indicate the study's design with a commonly used term in the title or the abstract                                                                                                            | 3       |
|                              |                                                                                    | (b) Provide in the abstract an informative and balanced summary of what was done and what was found                                                                                               | 3       |
| <b>Introduction</b>          |                                                                                    |                                                                                                                                                                                                   |         |
| Background/rationale         | 2                                                                                  | Explain the scientific background and rationale for the investigation being reported                                                                                                              | 6       |
| Objectives                   | 3                                                                                  | State specific objectives, including any prespecified hypotheses                                                                                                                                  | 7       |
| <b>Methods</b>               |                                                                                    |                                                                                                                                                                                                   |         |
| Study design                 | 4                                                                                  | Present key elements of study design early in the paper                                                                                                                                           | 7       |
| Setting                      | 5                                                                                  | Describe the setting, locations, and relevant dates, including periods of recruitment, exposure, follow-up, and data collection                                                                   | 7       |
| Participants                 | 6                                                                                  | (a) Give the eligibility criteria, and the sources and methods of selection of participants                                                                                                       | 7       |
| Variables                    | 7                                                                                  | Clearly define all outcomes, exposures, predictors, potential confounders, and effect modifiers. Give diagnostic criteria, if applicable                                                          | 8       |
| Data sources/<br>measurement | 8*                                                                                 | For each variable of interest, give sources of data and details of methods of assessment (measurement). Describe comparability of assessment methods if there is more than one group              | 7-8     |
| Bias                         | 9                                                                                  | Describe any efforts to address potential sources of bias                                                                                                                                         | 9       |
| Study size                   | 10                                                                                 | Explain how the study size was arrived at                                                                                                                                                         | 8       |
| Quantitative variables       | 11                                                                                 | Explain how quantitative variables were handled in the analyses. If applicable, describe which groupings were chosen and why                                                                      | 9       |
| Statistical methods          | 12                                                                                 | (a) Describe all statistical methods, including those used to control for confounding                                                                                                             | 9-10    |
|                              |                                                                                    | (b) Describe any methods used to examine subgroups and interactions                                                                                                                               | 10      |
|                              | (c) Explain how missing data were addressed                                        | 8                                                                                                                                                                                                 |         |
|                              | (d) If applicable, describe analytical methods taking account of sampling strategy | 9-10                                                                                                                                                                                              |         |
|                              | (e) Describe any sensitivity analyses                                              | 10                                                                                                                                                                                                |         |
| <b>Results</b>               |                                                                                    |                                                                                                                                                                                                   |         |
| Participants                 | 13*                                                                                | (a) Report numbers of individuals at each stage of study—eg numbers potentially eligible, examined for eligibility, confirmed eligible, included in the study, completing follow-up, and analysed | 10      |
|                              |                                                                                    | (b) Give reasons for non-participation at each stage                                                                                                                                              | 7-8     |
|                              |                                                                                    | (c) Consider use of a flow diagram                                                                                                                                                                | 7-8     |
| Descriptive data             | 14*                                                                                | (a) Give characteristics of study participants (eg demographic, clinical, social) and information on exposures and potential confounders                                                          | 10-11   |
|                              |                                                                                    | (b) Indicate number of participants with missing data for each variable of interest                                                                                                               | 7-8     |
| Outcome data                 | 15*                                                                                | Report numbers of outcome events or summary measures                                                                                                                                              | 10-11   |

|    |                          |    |                                                                                                                                                                                                              |
|----|--------------------------|----|--------------------------------------------------------------------------------------------------------------------------------------------------------------------------------------------------------------|
| 1  |                          |    |                                                                                                                                                                                                              |
| 2  | Main results             | 16 | (a) Give unadjusted estimates and, if applicable, confounder-adjusted estimates and their precision (eg, 95% confidence interval). Make clear which confounders were adjusted for and why they were included |
| 3  |                          |    | 11-12                                                                                                                                                                                                        |
| 4  |                          |    |                                                                                                                                                                                                              |
| 5  |                          |    |                                                                                                                                                                                                              |
| 6  |                          |    | (b) Report category boundaries when continuous variables were categorized                                                                                                                                    |
| 7  |                          |    | 10-11                                                                                                                                                                                                        |
| 8  |                          |    |                                                                                                                                                                                                              |
| 9  |                          |    | (c) If relevant, consider translating estimates of relative risk into absolute risk for a meaningful time period                                                                                             |
| 10 |                          |    | NA                                                                                                                                                                                                           |
| 11 | Other analyses           | 17 | Report other analyses done—eg analyses of subgroups and interactions, and sensitivity analyses                                                                                                               |
| 12 |                          |    | 12                                                                                                                                                                                                           |
| 13 |                          |    |                                                                                                                                                                                                              |
| 14 | <b>Discussion</b>        |    |                                                                                                                                                                                                              |
| 15 | Key results              | 18 | Summarise key results with reference to study objectives                                                                                                                                                     |
| 16 |                          |    | 13                                                                                                                                                                                                           |
| 17 | Limitations              | 19 | Discuss limitations of the study, taking into account sources of potential bias or imprecision. Discuss both direction and magnitude of any potential bias                                                   |
| 18 |                          |    | 16                                                                                                                                                                                                           |
| 19 |                          |    |                                                                                                                                                                                                              |
| 20 | Interpretation           | 20 | Give a cautious overall interpretation of results considering objectives, limitations, multiplicity of analyses, results from similar studies, and other relevant evidence                                   |
| 21 |                          |    | 13-16                                                                                                                                                                                                        |
| 22 |                          |    |                                                                                                                                                                                                              |
| 23 |                          |    |                                                                                                                                                                                                              |
| 24 | Generalisability         | 21 | Discuss the generalisability (external validity) of the study results                                                                                                                                        |
| 25 |                          |    | 15-16                                                                                                                                                                                                        |
| 26 |                          |    |                                                                                                                                                                                                              |
| 27 | <b>Other information</b> |    |                                                                                                                                                                                                              |
| 28 | Funding                  | 22 | Give the source of funding and the role of the funders for the present study and, if applicable, for the original study on which the present article is based                                                |
| 29 |                          |    | 17                                                                                                                                                                                                           |
| 30 |                          |    |                                                                                                                                                                                                              |
| 31 |                          |    |                                                                                                                                                                                                              |
| 32 |                          |    |                                                                                                                                                                                                              |

\*Give information separately for exposed and unexposed groups.

**Note:** An Explanation and Elaboration article discusses each checklist item and gives methodological background and published examples of transparent reporting. The STROBE checklist is best used in conjunction with this article (freely available on the Web sites of PLoS Medicine at <http://www.plosmedicine.org/>, Annals of Internal Medicine at <http://www.annals.org/>, and Epidemiology at <http://www.epidem.com/>). Information on the STROBE Initiative is available at [www.strobe-statement.org](http://www.strobe-statement.org).

# BMJ Open

## Association of long-term exposure to PM<sub>2.5</sub> with hypertension prevalence and blood pressure in China: a cross-sectional study

|                                 |                                                                                                                                                                                                                                                                                                                                                                                                                                                                                                                                                                                                                                                                                                                                                                                                                                                                                                                                                                                                                                                                                                                                                                                                                                                                                                                                                                                                                                                                                                                                                                                                                                                                                                                                                                                                                                                         |
|---------------------------------|---------------------------------------------------------------------------------------------------------------------------------------------------------------------------------------------------------------------------------------------------------------------------------------------------------------------------------------------------------------------------------------------------------------------------------------------------------------------------------------------------------------------------------------------------------------------------------------------------------------------------------------------------------------------------------------------------------------------------------------------------------------------------------------------------------------------------------------------------------------------------------------------------------------------------------------------------------------------------------------------------------------------------------------------------------------------------------------------------------------------------------------------------------------------------------------------------------------------------------------------------------------------------------------------------------------------------------------------------------------------------------------------------------------------------------------------------------------------------------------------------------------------------------------------------------------------------------------------------------------------------------------------------------------------------------------------------------------------------------------------------------------------------------------------------------------------------------------------------------|
| Journal:                        | <i>BMJ Open</i>                                                                                                                                                                                                                                                                                                                                                                                                                                                                                                                                                                                                                                                                                                                                                                                                                                                                                                                                                                                                                                                                                                                                                                                                                                                                                                                                                                                                                                                                                                                                                                                                                                                                                                                                                                                                                                         |
| Manuscript ID                   | bmjopen-2021-050159.R1                                                                                                                                                                                                                                                                                                                                                                                                                                                                                                                                                                                                                                                                                                                                                                                                                                                                                                                                                                                                                                                                                                                                                                                                                                                                                                                                                                                                                                                                                                                                                                                                                                                                                                                                                                                                                                  |
| Article Type:                   | Original research                                                                                                                                                                                                                                                                                                                                                                                                                                                                                                                                                                                                                                                                                                                                                                                                                                                                                                                                                                                                                                                                                                                                                                                                                                                                                                                                                                                                                                                                                                                                                                                                                                                                                                                                                                                                                                       |
| Date Submitted by the Author:   | 20-Jul-2021                                                                                                                                                                                                                                                                                                                                                                                                                                                                                                                                                                                                                                                                                                                                                                                                                                                                                                                                                                                                                                                                                                                                                                                                                                                                                                                                                                                                                                                                                                                                                                                                                                                                                                                                                                                                                                             |
| Complete List of Authors:       | <p>Song, Jiali; Chinese Academy of Medical Sciences &amp; Peking Union Medical College Fuwai Hospital, National Clinical Research Center for Cardiovascular Diseases</p> <p>Gao, Yan; Chinese Academy of Medical Sciences &amp; Peking Union Medical College Fuwai Hospital, National Clinical Research Center for Cardiovascular Diseases</p> <p>Hu, Shuang; Chinese Academy of Medical Sciences &amp; Peking Union Medical College Fuwai Hospital, National Clinical Research Center for Cardiovascular Diseases</p> <p>Medda, Emanuela; Istituto Superiore di Sanità, Reference Centre for Behavioural Sciences and Mental Health</p> <p>Tang, Guigang; Ministry of Ecology and Environment of the People's Republic of China, China National Environmental Monitoring Centre</p> <p>Zhang, Di; Ministry of Ecology and Environment of the People's Republic of China, China National Environmental Monitoring Centre</p> <p>Zhang, Wenbo; Chinese Academy of Medical Sciences &amp; Peking Union Medical College Fuwai Hospital, National Clinical Research Center for Cardiovascular Diseases</p> <p>Li, Xi; Chinese Academy of Medical Sciences &amp; Peking Union Medical College Fuwai Hospital, National Clinical Research Center for Cardiovascular Diseases</p> <p>Li, Jing; Chinese Academy of Medical Sciences &amp; Peking Union Medical College Fuwai Hospital, National Clinical Research Center for Cardiovascular Diseases</p> <p>Renzi, Matteo; Department of Epidemiology of the Regional Health Service Lazio, Epidemiology,</p> <p>Stazi, Maria Antonietta; Istituto Superiore di Sanità, Reference Centre for Behavioural Sciences and Mental Health</p> <p>Zheng, Xin; Chinese Academy of Medical Sciences &amp; Peking Union Medical College Fuwai Hospital, National Clinical Research Center for Cardiovascular Diseases</p> |
| <b>Primary Subject Heading</b>: | Public health                                                                                                                                                                                                                                                                                                                                                                                                                                                                                                                                                                                                                                                                                                                                                                                                                                                                                                                                                                                                                                                                                                                                                                                                                                                                                                                                                                                                                                                                                                                                                                                                                                                                                                                                                                                                                                           |
| Secondary Subject Heading:      | Epidemiology, Public health                                                                                                                                                                                                                                                                                                                                                                                                                                                                                                                                                                                                                                                                                                                                                                                                                                                                                                                                                                                                                                                                                                                                                                                                                                                                                                                                                                                                                                                                                                                                                                                                                                                                                                                                                                                                                             |
| Keywords:                       | Epidemiology < TROPICAL MEDICINE, Public health < INFECTIOUS DISEASES, Hypertension < CARDIOLOGY                                                                                                                                                                                                                                                                                                                                                                                                                                                                                                                                                                                                                                                                                                                                                                                                                                                                                                                                                                                                                                                                                                                                                                                                                                                                                                                                                                                                                                                                                                                                                                                                                                                                                                                                                        |

1  
2  
3  
4  
5  
6  
7  
8  
9  
10  
11  
12  
13  
14  
15  
16  
17  
18  
19  
20  
21  
22  
23  
24  
25  
26  
27  
28  
29  
30  
31  
32  
33  
34  
35  
36  
37  
38  
39  
40  
41  
42  
43  
44  
45  
46  
47  
48  
49  
50  
51  
52  
53  
54  
55  
56  
57  
58  
59  
60

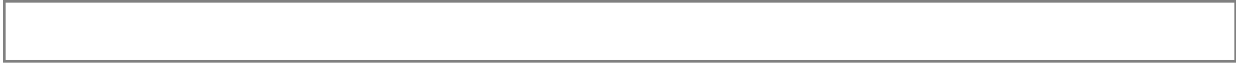

SCHOLARONE™  
Manuscripts





I, the Submitting Author has the right to grant and does grant on behalf of all authors of the Work (as defined in the below author licence), an exclusive licence and/or a non-exclusive licence for contributions from authors who are: i) UK Crown employees; ii) where BMJ has agreed a CC-BY licence shall apply, and/or iii) in accordance with the terms applicable for US Federal Government officers or employees acting as part of their official duties; on a worldwide, perpetual, irrevocable, royalty-free basis to BMJ Publishing Group Ltd ("BMJ") its licensees and where the relevant Journal is co-owned by BMJ to the co-owners of the Journal, to publish the Work in this journal and any other BMJ products and to exploit all rights, as set out in our [licence](#).

The Submitting Author accepts and understands that any supply made under these terms is made by BMJ to the Submitting Author unless you are acting as an employee on behalf of your employer or a postgraduate student of an affiliated institution which is paying any applicable article publishing charge ("APC") for Open Access articles. Where the Submitting Author wishes to make the Work available on an Open Access basis (and intends to pay the relevant APC), the terms of reuse of such Open Access shall be governed by a Creative Commons licence – details of these licences and which [Creative Commons](#) licence will apply to this Work are set out in our licence referred to above.

Other than as permitted in any relevant BMJ Author's Self Archiving Policies, I confirm this Work has not been accepted for publication elsewhere, is not being considered for publication elsewhere and does not duplicate material already published. I confirm all authors consent to publication of this Work and authorise the granting of this licence.

**TITLE PAGE****Association of long-term exposure to PM<sub>2.5</sub> with hypertension prevalence and blood pressure in China: a cross-sectional study****Authors**

Jiali Song\*, MD; Yan Gao\*, MSc; Shuang Hu, PhD; Emanuela Medda, MSc; Guigang Tang, MSc; Di Zhang, MSc; Wenbo Zhang, MPH; Xi Li, MD, PhD; Jing Li, MD, PhD; Matteo Renzi, MSc; Maria Antonietta Stazi, MSc; Xin Zheng†, MD, PhD

\*Joint first authors

†Corresponding author

**Author Affiliations**

National Clinical Research Center for Cardiovascular Diseases, NHC Key Laboratory of Clinical Research for Cardiovascular Medications, State Key Laboratory of Cardiovascular Disease, Fuwai Hospital, Chinese Academy of Medical Sciences and Peking Union Medical College, National Center for Cardiovascular Diseases (Song, Gao, Hu, W. Zhang, X. Li, J. Li, Zheng); Reference Centre for Behavioural Sciences and Mental Health, Istituto Superiore di Sanità, Rome, Italy (Medda, Stazi); Department of Epidemiology of Lazio Region, Rome, Italy (Renzi); China National Environmental Monitoring Centre, State Environmental Protection Key Laboratory of Quality Control in Environmental Monitoring, Ministry of Ecology and Environment of the People's Republic of China (Tang, D. Zhang)

**Correspondence**

Dr. Xin Zheng, National Clinical Research Center for Cardiovascular Diseases, Fuwai Hospital,  
167 Beilishi Road, Beijing 100037, People's Republic of China; Tel: +86 010 6086 6719; Email:  
xin.zheng@fwoxford.org

**Word count:** 2,931 words (main text)

**Number of figures:** 4

For peer review only

## ABSTRACT

**Objective:** Evidence of the effects of long-term fine particulate matter (PM<sub>2.5</sub>) exposure on hypertension and blood pressure is limited for populations exposed to high levels of PM<sub>2.5</sub>. We aim to assess associations of long-term exposure to PM<sub>2.5</sub> with hypertension prevalence and blood pressure, and further explore the subpopulation differences and effect modification by participant characteristics in these associations in China.

**Methods:** We analyzed cross-sectional data from 883,827 participants aged 35–75 years in the China Patient-Centered Evaluative Assessment of Cardiac Events (PEACE) Million Persons Project. Data from the monitoring station was used to estimate the one-year average concentration of PM<sub>2.5</sub>. The associations of PM<sub>2.5</sub> exposure with hypertension prevalence and blood pressure were investigated by generalized linear models, with PM<sub>2.5</sub> included as either linear or spline functions.

**Results:** The 1-year PM<sub>2.5</sub> exposure of the study population ranged from 8.8 to 93.8 µg/m<sup>3</sup> (mean 49.2 µg/m<sup>3</sup>). The adjusted odds ratio of hypertension prevalence related to a 10 µg/m<sup>3</sup> increase in one-year PM<sub>2.5</sub> exposure was 1.09 (95% confidence interval, 1.08–1.10). Each 10 µg/m<sup>3</sup> increment in PM<sub>2.5</sub> exposure was associated with increases of 0.50 mmHg (95% confidence interval, 0.41–0.59) and 0.23 mmHg (95% confidence interval, 0.18–0.28) in systolic blood pressure and diastolic blood pressure, respectively. The concentration-response curves for hypertension prevalence and systolic blood pressure showed steeper slopes at higher PM<sub>2.5</sub> levels; while the curve for diastolic blood pressure was U-shaped. The elderly, men, and non-current smokers were more susceptible to the exposure of PM<sub>2.5</sub>.

**Conclusions:** Long-term exposure to PM<sub>2.5</sub> is associated with higher blood pressure and

1  
2  
3  
4 increased risk of hypertension prevalence. The effects of PM<sub>2.5</sub> on hypertension prevalence  
5  
6 become more pronounced at higher PM<sub>2.5</sub> levels. These findings emphasize the need to  
7  
8  
9 reduce air pollution, especially in areas with severe air pollution.  
10  
11  
12  
13

14 **Keywords:** Air pollution; Blood pressure; Hypertension  
15  
16  
17  
18  
19  
20  
21  
22  
23  
24  
25  
26  
27  
28  
29  
30  
31  
32  
33  
34  
35  
36  
37  
38  
39  
40  
41  
42  
43  
44  
45  
46  
47  
48  
49  
50  
51  
52  
53  
54  
55  
56  
57  
58  
59  
60

For peer review only

### Strengths and limitations of this study

- The large size of our study allowed us to comprehensively assess these associations among a diverse spectrum of population across a wider range of PM<sub>2.5</sub> concentrations in China.
- The large number of participants with hypertension and high level of PM<sub>2.5</sub> exposure (e.g. >35 µg/m<sup>3</sup>), enabled us to examine these associations with greater precision and sufficient statistical power.
- Given the nature of the cross-sectional study design, the causal relationship could not be established.
- A selection bias is possible because our analysis was restricted to participants with available PM<sub>2.5</sub> data.

## 1 INTRODUCTION

2 Hypertension is the leading risk factor for death globally.<sup>1</sup> Although hypertension is a  
3 worldwide public health concern, three-quarters of the world's population with the condition  
4 are living in low- and middle-income countries (LMICs).<sup>2</sup> The causes of hypertension are  
5 complex. Apart from genetic predisposition, social determinants, and lifestyle factors, air  
6 pollution, especially fine particulate matter with an aerodynamic diameter of 2.5 µm or less  
7 (PM<sub>2.5</sub>), may also contribute to increased risk for hypertension.<sup>3, 4</sup>

8  
9 Over the past few years, a growing body of epidemiological evidence indicated the  
10 association of long-term exposure to PM<sub>2.5</sub> with blood pressure and hypertension.<sup>5-10</sup>  
11 However, most of the studies were undertaken in high-income countries.<sup>8, 10</sup> Compared with  
12 high-income countries, exposure to PM<sub>2.5</sub> is substantially higher in LMICs. Although several  
13 studies have been performed in LMICs, they were largely confined to specific populations  
14 (such as reproductive-aged adults) or regions.<sup>5-7</sup> Therefore, further studies are needed to  
15 assess the associations of PM<sub>2.5</sub> with blood pressure and prevalence of hypertension among  
16 a wider spectrum of populations with high PM<sub>2.5</sub> concentrations, especially in LMICs.

17  
18 China is experiencing a growing epidemic of hypertension and is estimated to have 300  
19 million individuals with hypertension by 2025.<sup>11</sup> Meanwhile, outdoor PM<sub>2.5</sub> has become one  
20 of China's most serious environmental problems with population-weighted annual means of  
21 PM<sub>2.5</sub> ranging from 19.1 µg/m<sup>3</sup> to 79.3 µg/m<sup>3</sup> in 2015.<sup>12</sup> A deeper understanding of the  
22 chronic health effects of PM<sub>2.5</sub> on hypertension prevalence and blood pressure in moderate

1  
2  
3  
4 23 to high PM<sub>2.5</sub> concentrations will help to develop policies to improve air quality and combat  
5  
6 24 the hypertension epidemic in China.  
7  
8  
9 25  
10  
11 26 Accordingly, incorporating PM<sub>2.5</sub> data with a large-scale population-based screening project  
12  
13  
14 27 in China, the China Patient-Centered Evaluative Assessment of Cardiac Events (PEACE)  
15  
16  
17 28 Million Persons Project, we aimed to: (1) explore the association of long-term PM<sub>2.5</sub>  
18  
19 29 exposure with blood pressure level and hypertension prevalence, and evaluate  
20  
21  
22 30 subpopulation differences and effect modification by characteristics of participants in these  
23  
24  
25 31 associations; (2) assess the concentration-response relationships of long-term PM<sub>2.5</sub>  
26  
27 32 exposure with hypertension prevalence and blood pressure.  
28  
29  
30  
31  
32  
33

## 34 **METHODS**

### 35 **Study population**

36  
37 36 Our study population is derived from the China PEACE Million Persons Project, which has  
38  
39  
40 37 been described previously.<sup>13</sup> In brief, we selected county-level regions using a convenience  
41  
42  
43 38 sampling strategy in all 31 provinces in mainland China from September 2014 to March  
44  
45  
46 39 2019. These regions are designated as rural counties or urban districts according to urban-  
47  
48  
49 40 rural division codes of the National Bureau of Statistics of China.<sup>14</sup> Local residents aged 35  
50  
51  
52 41 to 75 years, who were currently registered in the selected region's Hukou (a record officially  
53  
54  
55 42 identifying a person as a resident of an area) or had lived in the region for at least 6 of the  
56  
57  
58 43 previous 12 months, were enrolled in this project. After excluding participants with missing  
59  
60 44 data on education level (n=13,714), body mass index (n=321), or blood pressure



1  
2  
3  
4 45 measurement (n=2), we further excluded participants with systolic blood pressure (SBP)  $\geq$   
5  
6 46 250 mmHg or diastolic blood pressure (DBP)  $\geq$ 150 mmHg to minimize the potential bias due  
7  
8  
9 47 to measurement errors in blood pressure values (n=73). Finally, we included 883,827  
10  
11  
12 48 participants in the study sample. The central ethics committee at the China National Center  
13  
14 49 for Cardiovascular Diseases approved this project. All enrolled participants provided written  
15  
16  
17 50 informed consent.

18  
19  
20  
21  
22 51

## 22 52 **Data collection and variable definitions**

23  
24 53 Data collection for each participant was performed by trained personnel with a standardized  
25  
26  
27 54 in-person interview and a medical examination. Information on sociodemographic status  
28  
29  
30 55 (age, gender, and education level), lifestyle (smoking and alcohol use), medical history, and  
31  
32  
33 56 medication use were collected. Medication use was determined by asking participants  
34  
35  
36 57 whether they had taken prescribed medications for controlling blood pressure or glucose in  
37  
38  
39 58 the past 2 weeks. Those who answered "yes" and knew the drug names were asked to  
40  
41  
42 59 report the name, dose, and frequency of each drug. Those who did not remember the exact  
43  
44  
45 60 dose stated the number of pills or tablets taken (**Supplement 1**).

46  
47  
48  
49  
50  
51  
52  
53  
54  
55  
56  
57  
58  
59  
60

62 The blood pressure of each participant was measured twice on the right upper arm after 5  
63 minutes of rest in a seated position with a standardized electronic blood pressure monitor  
64 (Omron HEM-7430). If the difference between the two SBP readings was greater than 10  
65 mmHg, a third measurement was obtained, and the average of the last 2 readings was used.  
66 Hypertension was defined as SBP of 140 mmHg or higher, DBP of 90 mmHg or higher, or

1  
2  
3  
4 67 use of antihypertensive medications, which is consistent with the US Joint National  
5  
6 68 Committee and Chinese definitions<sup>15, 16</sup>. Body mass index (BMI) was defined as weight in  
7  
8  
9 69 kilograms divided by height in square meters. Obesity was defined as 28.0 kg/m<sup>2</sup> or higher,  
10  
11  
12 70 based on recommendations from the Working Group on Obesity in China.<sup>17</sup>

13  
14 71

## 17 72 **Exposure Assessment**

18  
19 73 We geocoded each participant's current address (either rural counties or urban districts) into  
20  
21  
22 74 latitude and longitude data and identified air monitors located within 10 kilometers  
23  
24  
25 75 (**Supplement 2**). The average distance between the address of participants and assigned  
26  
27 76 monitors was 2.7 (interquartile range 1.2, 3.5) kilometers. The measurements from these  
28  
29  
30 77 monitors strictly followed the methodological standards set by the State Environmental  
31  
32  
33 78 Protection Administration of China. For each participant, daily average PM<sub>2.5</sub> concentrations  
34  
35 79 measured at the nearest monitors to the residence were used to estimate PM<sub>2.5</sub> exposure.  
36  
37  
38 80 The 1-year average concentration before the medical examination was calculated and  
39  
40  
41 81 treated as an indicator of long-term exposure to PM<sub>2.5</sub>. In the present study, we included  
42  
43 82 participants with more than 330 valid PM<sub>2.5</sub> values for assessing long-term exposure, to  
44  
45  
46 83 ensure that, for each participant, the missing rate of PM<sub>2.5</sub> data in the preceding one year of  
47  
48 84 medical examination is less than 10%.<sup>18</sup>

49  
50  
51 85

## 53 86 **Statistical Analysis**

54  
55  
56 87 Continuous variables were reported as means with standard deviation; categorical variables  
57  
58  
59 88 were presented as percentages. We developed mixed models with a logit link function to

1  
2  
3  
4 89 assess the effect of long-term exposure to PM<sub>2.5</sub> on hypertension prevalence. To assess the  
5  
6 90 association of PM<sub>2.5</sub> and blood pressure, SBP and DBP were modeled using linear  
7  
8  
9 91 regressions with township-specific random intercepts. For each of these analyses, we  
10  
11 92 started with a model (Model 1) which only included age and sex. We then incrementally  
12  
13 93 adjusted for additional covariates. The second model (Model 2) included Model1 and  
14  
15 94 socioeconomic factors (education level and urbanity). The third model (Model 3) included  
16  
17 95 Model 2 and cardiovascular disease risk factors (BMI, smoking status, alcohol consumption,  
18  
19 96 and diabetes). Models of blood pressure were controlled for hypertensive medication use;  
20  
21 97 while models of hypertension were not, as hypertension medication use was a component of  
22  
23 98 the outcome definition. For sensitivity analysis, we additionally adjusted for the day of week  
24  
25 99 (one indicator variable per day) and season of measurement (summer: June–August; fall:  
26  
27 100 September–November; winter: December–February; spring: March–May) to account for  
28  
29 101 potential time-variant factors. We also used restricted cubic splines to characterize the  
30  
31 102 concentration-response (C-R) relationships of PM<sub>2.5</sub> with hypertension prevalence and blood  
32  
33 103 pressure.<sup>19</sup> In addition, to examine effect modification by age, gender, smoking status,  
34  
35 104 alcohol consumption, diabetes, and obesity, each potential modifier was tested by adding an  
36  
37 105 interaction term in the regression model separately and testing its statistical significance as  
38  
39 106 well as the association per categories of the tested variable through subgroup analyses.  
40  
41  
42  
43  
44  
45  
46  
47  
48  
49  
50  
51 107  
52  
53 108 Analyses were conducted with SAS version 9.4, 64-bit Windows (SAS Institute Inc., Cary,  
54  
55 109 North Carolina). All tests of significance were 2-tailed, with a level of significance set at an  
56  
57 110 alpha of 0.05.  
58  
59  
60

111

## 112 **Patient and public involvement**

113 Patients and/or the public were not involved in the design, or conduct, or reporting, or  
114 dissemination plans of this research.

115

## 116 **RESULT**

### 117 **Study population and baseline characteristics**

118 We included a total of 883,827 participants distributed in 83 county-level regions of mainland  
119 China (**Supplement 3**). The mean age was 55.5 years, 60.4% were women, 43.1% had  
120 hypertension, mean SBP was 143.5 mmHg, mean DBP was 83.1 mmHg, and 19.4% were  
121 taking antihypertensive medications. The 1-year PM<sub>2.5</sub> exposure of the total study population  
122 ranged from 8.8 to 93.8 µg/m<sup>3</sup> (mean 49.2 µg/m<sup>3</sup>). There were 864,119 (97.8%), 842,356  
123 (95.3%), and 706,415 (79.9%) participants with 1-year PM<sub>2.5</sub> exposure higher than 15 µg/m<sup>3</sup>  
124 [World Health Organization (WHO) Interim Target 3 (IT-1)], 25 µg/m<sup>3</sup> [WHO Interim Target 2  
125 (IT-2)], and 35 µg/m<sup>3</sup> [WHO Interim Target 3 (IT-3)], respectively. (**Supplement 4**)

126

### 127 **Associations of long-term PM<sub>2.5</sub> exposure with hypertension prevalence**

128 After adjusting for sociodemographic characteristics and cardiovascular risk factors, the  
129 odds ratio (OR) of hypertension was 1.09 (95% CI: 1.08–1.10) for each 10 µg/m<sup>3</sup> increase in  
130 PM<sub>2.5</sub>. The association of PM<sub>2.5</sub> exposure with hypertension prevalence remained consistent  
131 across different model specifications (**Supplement 5**). For the C-R relationship, the curve  
132 showed steeper slopes at high PM<sub>2.5</sub> exposure levels (i.e., higher than ~50 µg/m<sup>3</sup>), and this

1  
2  
3  
4 133 trend was also evident in the sensitivity analysis with further adjustment for day of week and  
5  
6 134 season of blood pressure measurements (**Supplement 6**). Compared to individuals with the  
7  
8  
9 135 lowest level of PM<sub>2.5</sub> exposure (8.8 µg/m<sup>3</sup>), the adjusted ORs for hypertension of individuals  
10  
11  
12 136 with 15, 25, and 35 µg/m<sup>3</sup> of PM<sub>2.5</sub> exposure were 1.01 (95% CI: 1.01–1.02), 1.03 (95% CI:  
13  
14 137 1.02–1.04), and 1.05 (95% CI: 1.03–1.07), respectively. (**Figure 1**)  
15  
16

17 138

### 19 139 **Associations of long-term PM<sub>2.5</sub> exposure with systolic and diastolic blood pressure**

21  
22 140 In the adjusted Model 4, each 10 µg/m<sup>3</sup> increment was associated with increases of 0.50  
23  
24 141 mmHg (95% CI: 0.41–0.59) in SBP and 0.23 mmHg (95% CI: 0.18–0.28) in DBP. After  
25  
26  
27 142 adjustment for the day of week and season, these positive associations were also observed  
28  
29  
30 143 [0.19 mmHg (95% CI: 0.10–0.28) in SBP; 0.13 mmHg (95% CI: 0.08–0.18) in DBP].  
31

32 144 (**Supplement 7**) In addition, we found that the shapes of the C-R curves for SBP and DBP  
33  
34  
35 145 were different. The fitted C-R functions showed upward trends with greater effect estimates  
36  
37  
38 146 of PM<sub>2.5</sub> at higher concentrations for SBP but were generally U-shaped for DBP. (**Figure 2**)  
39

40 147 These C-R relationships for blood pressure remained robust after accounting for time-variant  
41  
42  
43 148 factors. (**Supplement 8**)  
44

45 149

### 48 150 **Subpopulation difference and effect modification**

49  
50  
51 151 The associations of PM<sub>2.5</sub> exposure with hypertension were stronger among the elderly (≥  
52  
53 152 65 years), men, and non-current smokers compared with their counterparts (**Figure 3**).  
54

55  
56 153 Gender significantly modified the effects of PM<sub>2.5</sub> exposure on all three outcomes (all p for  
57  
58 154 interaction <0.05) with stronger associations among men [e.g., OR for hypertension per 10  
59  
60

1  
2  
3  
4 155  $\mu\text{g}/\text{m}^3$  increase in  $\text{PM}_{2.5}$  of 1.06 (95% CI: 1.04–1.06) for women, and 1.12 (95% CI: 1.1–1.14)  
5  
6 156 for men]; while these associations were not modified by alcohol consumption (all p for  
7  
8  
9 157 interaction  $>0.05$ ). Although age and smoking status were also found to be effect modifiers  
10  
11 158 in the associations of  $\text{PM}_{2.5}$  exposure with SBP, DBP, and hypertension, the impacts of the  
12  
13  
14 159 two effect modifiers on these associations differed depending on the outcome. We observed  
15  
16  
17 160 greater effect estimates of  $\text{PM}_{2.5}$  exposure for SBP and hypertension [e.g., OR for  
18  
19 161 hypertension per 10  $\mu\text{g}/\text{m}^3$  increase in  $\text{PM}_{2.5}$  of 1.14 (95% CI: 1.12–1.17) for the elderly, and  
20  
21  
22 162 1.06 (95% CI: 1.05–1.08) for their younger counterparts], while smaller estimates for DBP  
23  
24  
25 163 among the elderly and non-current smokers [e.g., elevation in DBP per 10  $\mu\text{g}/\text{m}^3$  increase in  
26  
27 164  $\text{PM}_{2.5}$  of 0.16 mmHg (95% CI: 0.04–0.27) for the elderly, and 0.24 mmHg (95% CI: 0.19–0.3)  
28  
29  
30 165 for their younger counterparts]. (**Figure 4**)  
31  
32  
33 166

## 167 **DISCUSSION**

168 In this study, we investigated the associations between long-term exposure to  $\text{PM}_{2.5}$  and  
169 hypertension prevalence, SBP, and DBP. We found that  $\text{PM}_{2.5}$  was associated with  
170 increased risk of hypertension prevalence and elevation of blood pressure. Nonlinearity in  
171 these associations was also observed. The C-R curves for hypertension and SBP showed  
172 steeper slopes for  $\text{PM}_{2.5}$  concentration above 50  $\mu\text{g}/\text{m}^3$ ; while the C-R curve for  $\text{PM}_{2.5}$ –DBP  
173 was U-shaped, with the turning point around 50  $\mu\text{g}/\text{m}^3$ . The elderly, men, and non-current  
174 smokers appeared to be more susceptible to the exposure of  $\text{PM}_{2.5}$ .

175

176 Our study contributes to the existing scientific literature in several ways. First, we

1  
2  
3  
4 177 incorporated a large cross-sectional survey with extensive covariates data obtained by  
5  
6 178 personal interviews and standardized blood pressure measurements, which allowed us to  
7  
8  
9 179 comprehensively assess associations among a more diverse spectrum of population with a  
10  
11  
12 180 wider range of PM<sub>2.5</sub> concentrations. We found long-term exposure to PM<sub>2.5</sub> was positively  
13  
14 181 associated with hypertension prevalence and blood pressure. This echoed the data showing  
15  
16  
17 182 that there was an absolute increase of 139 million individuals with hypertension in China  
18  
19 183 during a decade from 2002–2013/14<sup>20</sup>, with the national PM<sub>2.5</sub> level gradually increasing in  
20  
21  
22 184 the meantime.<sup>21</sup> Furthermore, the magnitude of the effects for each 10 µg/m<sup>3</sup> increment in  
23  
24  
25 185 PM<sub>2.5</sub> were also similar compared to other studies.<sup>5, 7, 22-24</sup> For example, one study based on  
26  
27 186 361,560 adults observed that each 10 µg/m<sup>3</sup> in PM<sub>2.5</sub> was associated with increases of 0.45  
28  
29  
30 187 mmHg and 0.07 mmHg in SBP and DBP, respectively.<sup>22</sup> For hypertension prevalence, odds  
31  
32  
33 188 ratios related to a 10 µg/m<sup>3</sup> increase in PM<sub>2.5</sub> were ranged from 1.01 to 1.14 in prior  
34  
35  
36 189 studies.<sup>5, 23, 24</sup> It is also noteworthy that others have reported no or inconsistent  
37  
38 190 associations.<sup>25, 26</sup> Adar et al. found no associations between exposures to PM<sub>2.5</sub> and blood  
39  
40 191 pressure based on a longitudinal cohort.<sup>25</sup> However, this study only included a small fraction  
41  
42  
43 192 of Chinese populations (10%), and was conducted in the U.S. with a mean annual average  
44  
45  
46 193 PM<sub>2.5</sub> of 17 µg/m<sup>3</sup>, which was lower than this study (49.2 µg/m<sup>3</sup>).

47  
48 194  
49  
50 195 Second, we provided new information on the C-R relationship between long-term PM<sub>2.5</sub>  
51  
52  
53 196 exposure and hypertension prevalence. Previous research reported a U-shaped relationship  
54  
55  
56 197 with a threshold PM<sub>2.5</sub> of 47.9 µg/m<sup>3</sup>.<sup>5</sup> However, in our study, the risk of hypertension  
57  
58  
59 198 associated with PM<sub>2.5</sub> became even more pronounced when the exposure was extended to  
60

1  
2  
3  
4 199 higher levels. This finding was in line with a prior study based on prospective cohorts  
5  
6 200 showed that higher PM<sub>2.5</sub> exposure was significantly associated with increased risk of  
7  
8  
9 201 developing hypertension, with hazard ratios (95% CIs) for hypertension incidence of 1.27  
10  
11 202 (1.17–1.39), 1.44 (1.30–1.58), and 1.77 (1.56–2.00) for the participants in the second (71.9-  
12  
13  
14 203 73.7 µg/m<sup>3</sup>), third (73.7-82.2 µg/m<sup>3</sup>), and fourth quartiles (>82.2 µg/m<sup>3</sup>) of PM<sub>2.5</sub>  
15  
16  
17 204 concentrations compared with those in the first quartile (<71.9 µg/m<sup>3</sup>), respectively.<sup>27</sup> This  
18  
19 205 result suggests that a per unit decrease in the concentration of PM<sub>2.5</sub> can be translated to a  
20  
21  
22 206 greater reduction in excess hypertension prevalence in highly polluted regions compared  
23  
24  
25 207 with regions with low to moderate levels of PM<sub>2.5</sub> exposure.  
26  
27 208  
28  
29  
30 209 Third, we found evidence of nonlinearity in the relationships of PM<sub>2.5</sub> exposure with SBP and  
31  
32 210 DBP. Interestingly, the shape of curves for SBP and DBP were different. Although the  
33  
34  
35 211 relevant mechanism remains unclear, pathophysiological changes, such as systemic  
36  
37  
38 212 inflammation, atherosclerosis, endothelial dysfunction, and increased arterial stiffness,<sup>4</sup> may  
39  
40  
41 213 have contributed to the observed patterns. The increased arterial stiffness induced by PM<sub>2.5</sub>  
42  
43 214 would initially lead to elevation in SBP and decline in DBP, creating an increased pulse  
44  
45  
46 215 pressure.<sup>28</sup> While with further increase of arterial stiffness, the heart rates got higher to  
47  
48  
49 216 maintain the stroke volume, which could result in the rise of DBP afterward. In addition, prior  
50  
51  
52 217 studies have reported the effects of PM<sub>2.5</sub> exposure on pulse pressures showing a tendency  
53  
54  
55 218 of rising first and then declining at higher PM<sub>2.5</sub> levels, which partially supports this  
56  
57  
58 219 hypothesis.<sup>22</sup>  
59  
60



1  
2  
3  
4 221 Fourth, we assessed the subpopulation differences through stratified analyses and identified  
5  
6 222 the susceptible individuals to the exposure of PM<sub>2.5</sub>. We observed the large effect estimates  
7  
8  
9 223 of PM<sub>2.5</sub> on hypertension and SBP among the elderly. Elderly subjects may commonly  
10  
11 224 represent a higher prevalence of preexisting cardiovascular and respiratory diseases, which  
12  
13  
14 225 may confer susceptibility to PM<sub>2.5</sub>. Also, the results showed that PM<sub>2.5</sub> exposure had larger  
15  
16  
17 226 effects on hypertension in men, and such increased susceptibility may be related to sex-  
18  
19 227 related differences in the deposition localization and rates of air pollutants; specifically, men  
20  
21  
22 228 have larger airways and slightly lower airway reactivity.<sup>29</sup> Additionally, smoking status was  
23  
24  
25 229 found to be an effect modifier with smaller effects on hypertension among current smokers.  
26  
27 230 This finding is also supported by prior research.<sup>8, 22</sup> One possible explanation is that smoking  
28  
29  
30 231 and PM<sub>2.5</sub> exposure may share the same pathways in mediating cardiovascular effects and  
31  
32  
33 232 smoking may play a dominant role in smokers. Thus, exposure to PM<sub>2.5</sub> might not exert  
34  
35  
36 233 additional harmful effects via the same pathway.<sup>22</sup> There is also some potential that the  
37  
38 234 greater effect size in non-current smokers could also be connected to some of them being  
39  
40  
41 235 advised to quit smoking because of multiple comorbidities.  
42  
43 236  
44  
45 237 Our study should also be interpreted in the context of several limitations. First, given the  
46  
47  
48 238 nature of the cross-sectional study design, the causal relationship could not be established.  
49  
50  
51 239 Additional research is needed to examine these relationships in a prospective manner.  
52  
53  
54 240 Second, a selection bias is possible because our analysis was restricted to participants with  
55  
56  
57 241 available PM<sub>2.5</sub> data. Third, while we included a number of potential confounders in the  
58  
59 242 analyses, there might be unmeasured confounders that affected the observed associations.  
60

1  
2  
3  
4 243 In particular, we were unable to control for other confounders such as diet and physical  
5  
6 244 activity, because these data were only available in a subset of the China PEACE Million  
7  
8  
9 245 Persons Project cohort. Fourth, we used the data from the fixed monitors to estimate the  
10  
11 246 exposure of PM<sub>2.5</sub> and did not account for residential proximity to major roads, time-activity  
12  
13  
14 247 patterns, and indoor-related characteristics, which would likely result in nondifferential  
15  
16  
17 248 measurement errors. However, this approach is commonly used and previous research has  
18  
19 249 indicated that PM<sub>2.5</sub> exposure estimated by the nearest monitor was highly correlated with  
20  
21  
22 250 other sophisticated approaches<sup>30</sup>. Fifth, other gaseous pollutants, such as NO<sub>x</sub> and ozone,  
23  
24  
25 251 temperature, and noise were not included in this study. As a result, we were not able to  
26  
27 252 determine whether the observed effects were specifically attributable to PM<sub>2.5</sub> or the  
28  
29  
30 253 combined effects of these factors.

31  
32 254  
33  
34  
35 255 In conclusion, our study demonstrated that long-term exposure to PM<sub>2.5</sub> was positively  
36  
37 256 associated with blood pressure and hypertension prevalence. The effect of PM<sub>2.5</sub> on  
38  
39  
40 257 hypertension prevalence was more pronounced at higher PM<sub>2.5</sub> concentrations. Our findings  
41  
42  
43 258 reinforce the need to develop comprehensive strategies for addressing air pollution  
44  
45  
46 259 problems, especially for areas with severe air pollution.

47  
48 260

## 51 261 **ACKNOWLEDGMENTS**

52  
53 262 We thank all study individuals for their participation and appreciate the contributions made  
54  
55  
56 263 by project teams at the National Center for Cardiovascular Diseases in the realms of project  
57  
58  
59 264 design, operations, and data collection.

1  
2  
3  
4 2655  
6 266 **FUNDING SOURCES**

7  
8  
9 267 This project was supported by the National Key Research and Development Program  
10  
11 268 (2016YFE0103800) from the Ministry of Science and Technology of China, the CAMS  
12  
13  
14 269 Innovation Fund for Medical Science (2016-I2M-1-006), the Major Public Health Service  
15  
16  
17 270 Project from the Ministry of Finance and National Health and Family Planning Commission of  
18  
19 271 China and the 111 Project (B16005) from the Ministry of Education of China.  
20  
21

22 272

23  
24  
25 273 **DISCLOSURES**

26  
27 274 Dr. Jing Li discloses that she is a recipient of research grants from the government of China,  
28  
29  
30 275 through Fuwai Hospital, for research to improve the management of hypertension and blood  
31  
32 276 lipids, and to improve care quality and patient outcomes of cardiovascular disease; is a  
33  
34  
35 277 recipient of research agreements with Amgen, through National Center for Cardiovascular  
36  
37 278 Diseases (NCCD) and Fuwai Hospital, for a multi-centre trial to assess the efficacy and safety  
38  
39  
40 279 of Omecamtiv Mecarbil, and for dyslipidemic patient registration; is a recipient of a research  
41  
42  
43 280 agreement with Sanofi, through Fuwai Hospital, for a multi-centre trial on the effects of  
44  
45 281 sotagliflozin; is a recipient of a research agreement with University of Oxford, through Fuwai  
46  
47  
48 282 Hospital, for a multi-centre trial of empagliflozin; and was a recipient of a research agreement,  
49  
50  
51 283 through NCCD, from AstraZeneca for clinical research methods training. The authors declare  
52  
53 284 no other relevant conflicts of interest.  
54  
55

56 285  
57  
58  
59  
60

1  
2  
3  
4 **286 CONTRIBUTORS**

5  
6 287 JS and XZ conceived of this article. JS and YG wrote the manuscript with further  
7  
8  
9 288 contributions from XZ, XL, EM, MR, GT, DZ, WZ, JL, and MA. JS and SH completed all the  
10  
11  
12 289 statistical analyses. All authors interpreted data, contributed to critical revisions, and  
13  
14 290 approved the final version of the article.  
15  
16

17 291

18  
19 **292 DATA AVAILABILITY STATEMENT**

20  
21  
22 293 No data is available. The China PEACE Million Persons Project is a major national program,  
23  
24 294 and as the government policy stipulates, it is not permissible for the researchers to  
25  
26  
27 295 make the raw data publicly available at this time. All data generated during  
28  
29  
30 296 this study are included in this manuscript and its supplementary information  
31  
32  
33 297 files.  
34

35 298  
36  
37  
38  
39  
40  
41  
42  
43  
44  
45  
46  
47  
48  
49  
50  
51  
52  
53  
54  
55  
56  
57  
58  
59  
60

299 **REFERENCES**

- 300 1. Stanaway JD, Afshin A, Gakidou E, et al. Global, regional, and national comparative risk  
301 assessment of 84 behavioural, environmental and occupational, and metabolic risks or  
302 clusters of risks for 195 countries and territories, 1990-2017: a systematic analysis for the  
303 Global Burden of Disease Study 2017. *Lancet (London, England)*. Nov 10  
304 2018;392(10159):1923-1994. doi:10.1016/s0140-6736(18)32225-6
- 305 2. Mills KT, Bundy JD, Kelly TN, et al. Global Disparities of Hypertension Prevalence and  
306 Control. *Circulation*. 2016;134(6):441-450. doi:10.1161/circulationaha.115.018912
- 307 3. Rajagopalan S, Al-Kindi SG, Brook RD. Air Pollution and Cardiovascular Disease: JACC  
308 State-of-the-Art Review. *J Am Coll Cardiol*. Oct 23 2018;72(17):2054-2070.  
309 doi:10.1016/j.jacc.2018.07.099
- 310 4. Carey RM, Muntner P, Bosworth HB, Whelton PK. Prevention and Control of  
311 Hypertension: JACC Health Promotion Series. *J Am Coll Cardiol*. Sep 11 2018;72(11):1278-  
312 1293. doi:10.1016/j.jacc.2018.07.008
- 313 5. Xie X, Wang Y, Yang Y, et al. Long-Term Effects of Ambient Particulate Matter (With an  
314 Aerodynamic Diameter  $\leq 2.5$   $\mu\text{m}$ ) on Hypertension and Blood Pressure and Attributable  
315 Risk Among Reproductive-Age Adults in China. *Journal of the American Heart Association*.  
316 Apr 26 2018;7(9)doi:10.1161/jaha.118.008553
- 317 6. Dong GH, Qian ZM, Xaverius PK, et al. Association between long-term air pollution and  
318 increased blood pressure and hypertension in China. *Hypertension (Dallas, Tex : 1979)*. Mar  
319 2013;61(3):578-84. doi:10.1161/hypertensionaha.111.00003
- 320 7. Liu C, Chen R, Zhao Y, et al. Associations between ambient fine particulate air pollution

- 1  
2  
3  
4 321 and hypertension: A nationwide cross-sectional study in China. *The Science of the total*  
5  
6 322 *environment*. Apr 15 2017;584-585:869-874. doi:10.1016/j.scitotenv.2017.01.133  
7  
8  
9 323 8. Fuks KB, Weinmayr G, Foraster M, et al. Arterial blood pressure and long-term exposure  
10  
11 324 to traffic-related air pollution: an analysis in the European Study of Cohorts for Air Pollution  
12  
13 325 Effects (ESCAPE). *Environmental health perspectives*. Sep 2014;122(9):896-905.  
14  
15 326 doi:10.1289/ehp.1307725  
16  
17  
18  
19 327 9. Schwartz J, Alexeeff SE, Mordukhovich I, et al. Association between long-term exposure  
20  
21 328 to traffic particles and blood pressure in the Veterans Administration Normative Aging Study.  
22  
23 329 *Occupational and environmental medicine*. Jun 2012;69(6):422-7. doi:10.1136/oemed-2011-  
24  
25 330 100268  
26  
27  
28  
29  
30 331 10. Chan SH, Van Hee VC, Bergen S, et al. Long-Term Air Pollution Exposure and Blood  
31  
32 332 Pressure in the Sister Study. *Environmental health perspectives*. Oct 2015;123(10):951-8.  
33  
34 333 doi:10.1289/ehp.1408125  
35  
36  
37  
38 334 11. Kearney PM, Whelton M, Reynolds K, Muntner P, Whelton PK, He J. Global burden of  
39  
40 335 hypertension: analysis of worldwide data. *Lancet (London, England)*. Jan 15-21  
41  
42 336 2005;365(9455):217-23. doi:10.1016/s0140-6736(05)17741-1  
43  
44  
45  
46 337 12. Cohen AJ, Brauer M, Burnett R, et al. Estimates and 25-year trends of the global burden  
47  
48 338 of disease attributable to ambient air pollution: an analysis of data from the Global Burden of  
49  
50 339 Diseases Study 2015. *The Lancet*. 2017;389(10082):1907-1918.  
51  
52  
53  
54 340 13. Lu J, Xuan S, Downing NS, et al. Protocol for the China PEACE (Patient-centered  
55  
56 341 Evaluative Assessment of Cardiac Events) Million Persons Project pilot. *BMJ Open*. Jan 4  
57  
58 342 2016;6(1):e010200. doi:10.1136/bmjopen-2015-010200  
59  
60

- 1  
2  
3  
4 343 14. Compilation rules of zoning codes for statistics and urban-rural division codes. Accessed  
5  
6 344 July 1, 2021. [http://www.stats.gov.cn/tjsj/tjbz/200911/t20091125\\_8667.html](http://www.stats.gov.cn/tjsj/tjbz/200911/t20091125_8667.html)  
7  
8  
9 345 15. James PA, Oparil S, Carter BL, et al. 2014 evidence-based guideline for the management  
10  
11 346 of high blood pressure in adults: report from the panel members appointed to the Eighth Joint  
12  
13 347 National Committee (JNC 8). *Jama*. 2014;311(5):507-20.  
14  
15  
16 348 16. Liu LS, Writing Group of Chinese Guidelines for the Management of H. [2010 Chinese  
17  
18 349 guidelines for the management of hypertension]. *Zhonghua xin xue guan bing za zhi*. Jul  
19  
20 350 2011;39(7):579-615.  
21  
22  
23 351 17. Zhou BF. Predictive values of body mass index and waist circumference for risk factors  
24  
25 352 of certain related diseases in Chinese adults--study on optimal cut-off points of body mass  
26  
27 353 index and waist circumference in Chinese adults. *Biomedical and environmental sciences :  
28  
29 354 BES*. Mar 2002;15(1):83-96.  
30  
31  
32 355 18. Bennett DA. How can I deal with missing data in my study? *Australian and New Zealand  
33  
34 356 journal of public health*. 2001;25(5):464-469.  
35  
36  
37 357 19. Desquilbet L, Mariotti F. Dose-response analyses using restricted cubic spline functions  
38  
39 358 in public health research. *Statistics in medicine*. 2010;29(9):1037-1057.  
40  
41  
42 359 20. Li Y, Yang L, Wang L, et al. Burden of hypertension in China: A nationally representative  
43  
44 360 survey of 174,621 adults. *International journal of cardiology*. Jan 15 2017;227:516-523.  
45  
46 361 doi:10.1016/j.ijcard.2016.10.110  
47  
48  
49 362 21. Liang F, Xiao Q, Huang K, et al. The 17-y spatiotemporal trend of PM<sub>2.5</sub>  
50  
51 363 and its mortality burden in China. *Proceedings of the National Academy of Sciences*.  
52  
53 364 2020;117(41):25601-25608. doi:10.1073/pnas.1919641117  
54  
55  
56  
57  
58  
59  
60

- 1  
2  
3  
4 365 22. Zhang Z, Guo C, Lau AKH, et al. Long-Term Exposure to Fine Particulate Matter, Blood  
5  
6 366 Pressure, and Incident Hypertension in Taiwanese Adults. *Environmental health perspectives*.  
7  
8  
9 367 Jan 18 2018;126(1):017008. doi:10.1289/ehp2466  
10  
11 368 23. Cai Y, Zhang B, Ke W, et al. Associations of Short-Term and Long-Term Exposure to  
12  
13 369 Ambient Air Pollutants With Hypertension: A Systematic Review and Meta-Analysis.  
14  
15  
16 370 *Hypertension (Dallas, Tex : 1979)*. Jul 2016;68(1):62-70.  
17  
18  
19 371 doi:10.1161/hypertensionaha.116.07218  
20  
21 372 24. Lin H, Guo Y, Zheng Y, et al. Long-Term Effects of Ambient PM2.5 on Hypertension and  
22  
23 373 Blood Pressure and Attributable Risk Among Older Chinese Adults. *Hypertension (Dallas, Tex*  
24  
25 374 *: 1979)*. 2017;69(5):806-812. doi:10.1161/hypertensionaha.116.08839  
26  
27  
28  
29 375 25. Adar SD, Chen YH, D'Souza JC, et al. Longitudinal Analysis of Long-Term Air Pollution  
30  
31 376 Levels and Blood Pressure: A Cautionary Tale from the Multi-Ethnic Study of Atherosclerosis.  
32  
33 377 *Environmental health perspectives*. Oct 2018;126(10):107003. doi:10.1289/ehp2966  
34  
35  
36 378 26. Chen S-Y, Wu C-F, Lee J-H, et al. Associations between Long-Term Air Pollutant  
37  
38 379 Exposures and Blood Pressure in Elderly Residents of Taipei City: A Cross-Sectional Study.  
39  
40 380 *Environmental health perspectives*. 2015;123(8):779-784. doi:10.1289/ehp.1408771  
41  
42  
43 381 27. Huang K, Yang X, Liang F, et al. Long-Term Exposure to Fine Particulate Matter and  
44  
45 382 Hypertension Incidence in China. *Hypertension (Dallas, Tex : 1979)*. Jun 2019;73(6):1195-  
46  
47 383 1201. doi:10.1161/hypertensionaha.119.12666  
48  
49  
50 384 28. Bavishi C, Goel S, Messerli FH. Isolated systolic hypertension: an update after SPRINT.  
51  
52 385 *The American journal of medicine*. 2016;129(12):1251-1258.  
53  
54  
55 386 29. Yunginger JW, Reed CE, O'Connell EJ, Melton L, O'Fallon WM, Silverstein MD. A  
56  
57  
58  
59  
60



1  
2  
3  
4 387 community-based study of the epidemiology of asthma. *Am Rev Respir Dis*. 1992;146(4):888-  
5  
6 388 894.  
7

8  
9 389 30. Miller KA, Spalt EW, Gasset AJ, et al. Estimating ambient-origin PM2.5 exposure for  
10  
11 390 epidemiology: observations, prediction, and validation using personal sampling in the Multi-  
12  
13 391 Ethnic Study of Atherosclerosis. *Journal of exposure science & environmental epidemiology*.  
14  
15 392 2019;29(2):227-237. doi:10.1038/s41370-018-0053-x  
16  
17  
18

19 393

20 394  
21  
22  
23  
24  
25  
26  
27  
28  
29  
30  
31  
32  
33  
34  
35  
36  
37  
38  
39  
40  
41  
42  
43  
44  
45  
46  
47  
48  
49  
50  
51  
52  
53  
54  
55  
56  
57  
58  
59  
60

1  
2  
3  
4 395 **FIGURE LEGEND**

5  
6 396 **Figure 1.** Concentration-response functions of the long-term exposure to PM<sub>2.5</sub> with  
7 397 hypertension prevalence

8  
9 398 **Figure 2.** Concentration-response functions of the long-term exposure to PM<sub>2.5</sub> with systolic  
10 399 blood pressure (SBP) and diastolic blood pressure (DBP)

11  
12 400 **Figure 3.** Stratified analysis of the association of long-term exposure to PM<sub>2.5</sub> with  
13 401 hypertension prevalence

14  
15 402 **Figure 4.** Stratified analysis of the association of long-term exposure to PM<sub>2.5</sub> with systolic  
16 403 blood pressure (SBP) and diastolic blood pressure (DBP)

17  
18  
19  
20  
21  
22  
23  
24  
25  
26  
27  
28  
29  
30  
31  
32  
33  
34  
35  
36  
37  
38  
39  
40  
41  
42  
43  
44  
45  
46  
47  
48  
49  
50  
51  
52  
53  
54  
55  
56  
57  
58  
59  
60

For peer review only



Figure 1. Concentration-response functions of the long-term exposure to PM2.5 with hypertension prevalence.

Effect estimates were presented as adjusted odds ratios for hypertension prevalence compared to individuals with PM2.5 exposure 8.8 µg/m<sup>3</sup>.

The dashed lines represent the air-quality standards for annual average concentrations of PM2.5 according to the World Health Organization (WHO) Interim Target 1 (IT-1), WHO Interim Target 2 (IT-2), WHO Interim Target 3 (IT-3).

Covariates used within the multivariate-adjusted models included age, sex, education level, urbanity, smoking status, alcohol consumption, obesity, and diabetes

169x127mm (300 x 300 DPI)

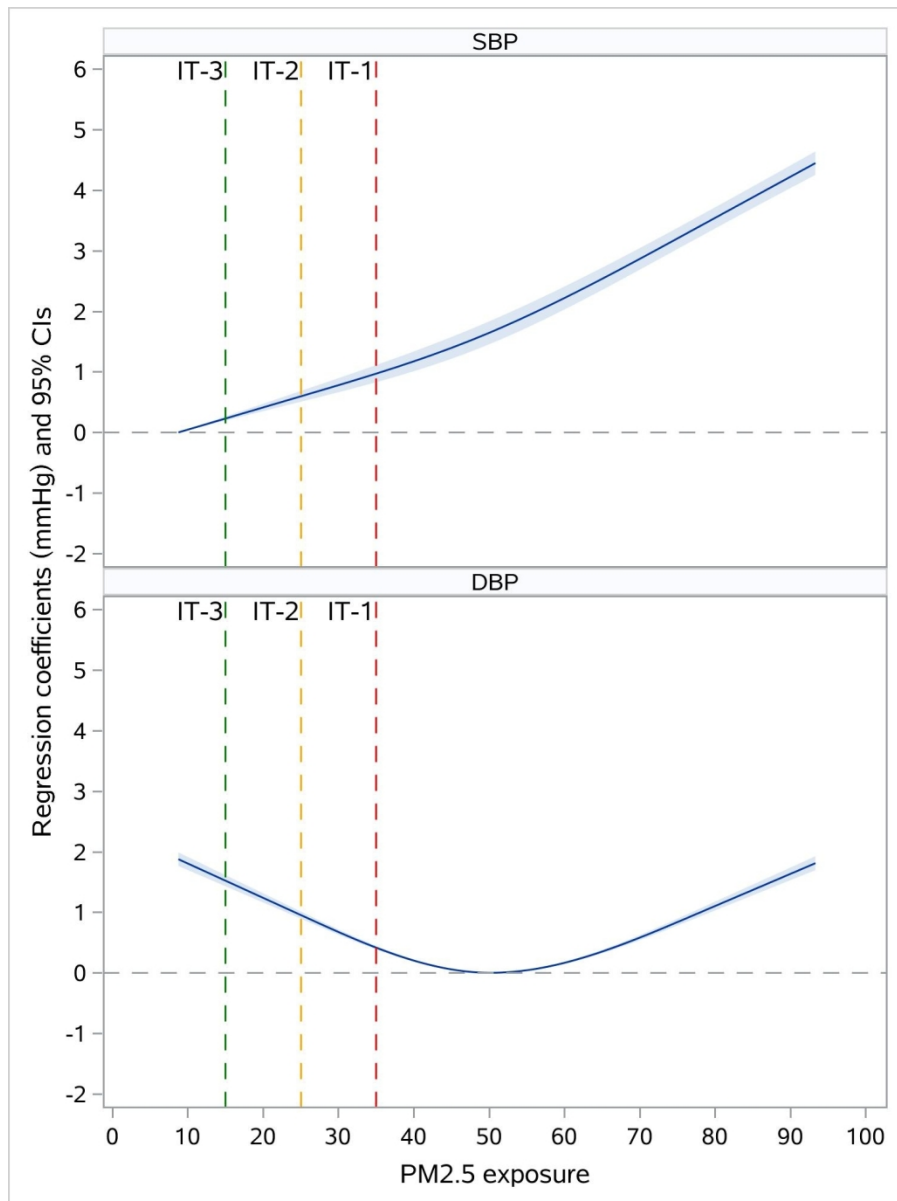

Figure 2. Concentration-response functions of the long-term exposure to PM<sub>2.5</sub> with systolic blood pressure (SBP) and diastolic blood pressure (DBP). Effect estimates (regression coefficients) were presented as changes in SBP compared to individuals with PM<sub>2.5</sub> exposure 8.8 µg/m<sup>3</sup> and changes in DBP compared to individuals with PM<sub>2.5</sub> exposure 50 µg/m<sup>3</sup>. The dashed lines represent the air-quality standards for annual average concentrations of PM<sub>2.5</sub> according to the World Health Organization (WHO) Interim Target 1 (IT-1), WHO Interim Target 2 (IT-2), WHO Interim Target 3 (IT-3).

Covariates used within the multivariate-adjusted models included age, sex, education level, urbanity, smoking status, alcohol consumption, obesity, diabetes, and use of antihypertensive medications.

127x169mm (300 x 300 DPI)

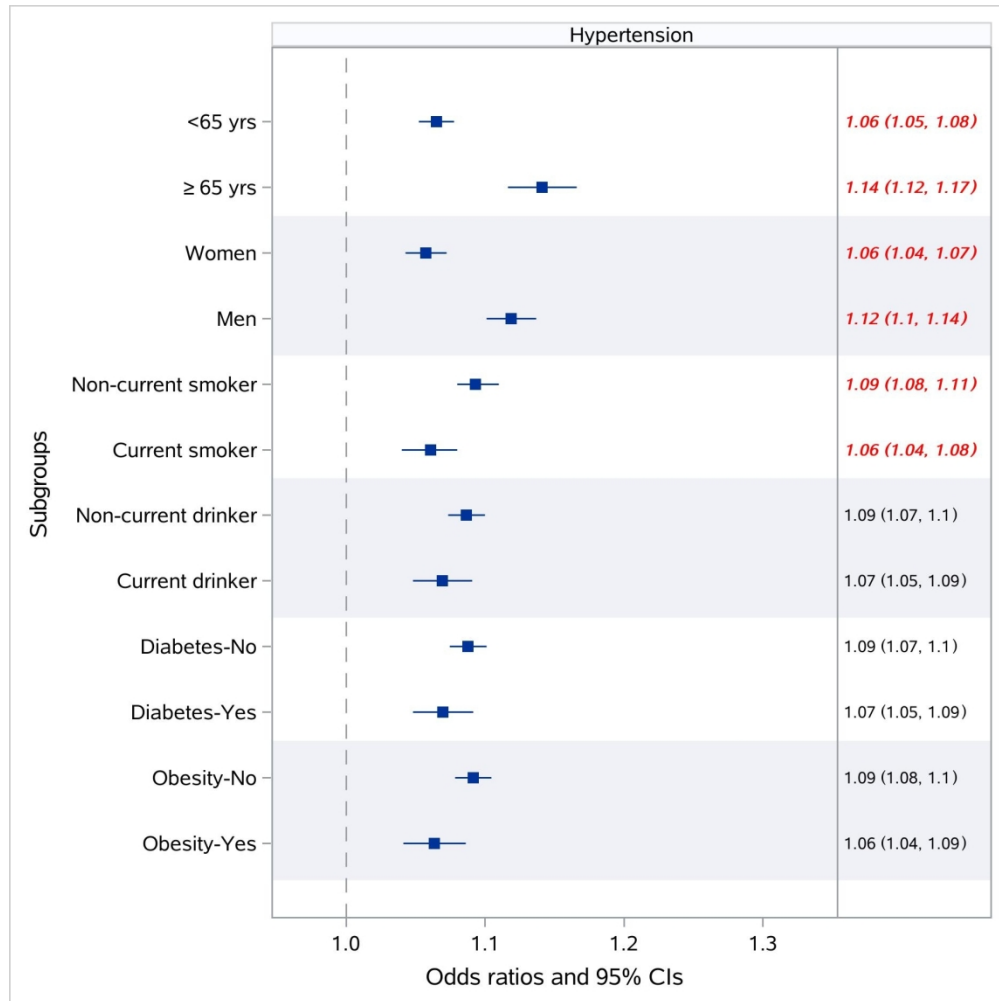

Stratified analysis of the association of long-term exposure to PM2.5 with hypertension prevalence.

Red texts with italics indicated that p-value for interaction terms < 0.05.

Effect estimates (regression coefficients) were presented as adjusted odds ratios for hypertension prevalence for each 10 µg/m<sup>3</sup> increment in the 1-year PM2.5 exposure.

Covariates used within the multivariate-adjusted models included age, sex, education level, urbanity, smoking status, alcohol consumption, obesity and diabetes.

158x158mm (300 x 300 DPI)



Figure 4. Stratified analysis of the association of long-term exposure to PM<sub>2.5</sub> with blood pressure

Red texts with italics indicated that p-value for interaction terms  $< 0.05$ .

Effect estimates (regression coefficients) were presented as changes in systolic blood pressure (SBP) or diastolic blood pressure (DBP) for each 10  $\mu\text{g}/\text{m}^3$  increment in the 1-year PM<sub>2.5</sub> exposure deriving from multivariable linear regression. Covariates used within the multivariate-adjusted models included age, sex, education level, urbanity, smoking status, alcohol consumption, obesity, diabetes, and use of antihypertensive medications.

238x158mm (300 x 300 DPI)

1  
2  
3  
4 **1 SUPPLEMENTAL MATERIAL**

5  
6 **2 Supplement 1. Collection of medication data in China PEACE Million Persons Project.**

7  
8 3 Potential participants who were taking medications were required to bring their drug  
9 4 packaging (boxes) to the project sites. During the face-to-face interview, local project staff  
10 5 asked participants whether they always took anti-hypertension, lipid-lowering, anti-diabetics,  
11 6 or anti-platelet drugs during the past 2 weeks. Those who answered “yes” and knew the  
12 7 name of the drug were further asked to report the name, dose, and frequency of each drug.  
13 8 For those who did not remember the exact dose of the drug, the number of tablets or pills  
14 9 taken was recorded. Interviewers searched and selected drug names or the first letter of the  
15 10 Chinese phonetic alphabet participants answered by entering the generic name or trade  
16 11 name of each drug in the electronic data collecting system. In this system, a data dictionary  
17 12 was used to confirm drug information, including the drug class, generic name, trade name,  
18 13 and corresponding unique ID.  
19  
20  
21  
22  
23  
24  
25  
26  
27  
28  
29  
30  
31  
32  
33  
34  
35  
36  
37  
38  
39  
40  
41  
42  
43  
44  
45  
46  
47  
48  
49  
50  
51  
52  
53  
54  
55  
56  
57  
58  
59  
60

15 **Supplement 2. Summary statistics for daily PM<sub>2.5</sub> (µg/m<sup>3</sup>) concentrations of assigned**  
 16 **monitors in 83 study regions.**

| No. | Mean  | Median | 25 <sup>th</sup><br>percentile | 75 <sup>th</sup><br>percentile | Minimum | Maximum | Total<br>(days) | Missing<br>(days) |
|-----|-------|--------|--------------------------------|--------------------------------|---------|---------|-----------------|-------------------|
| 1   | 67.9  | 50     | 26                             | 88                             | 5       | 540     | 1461            | 22                |
| 2   | 65.48 | 48     | 23                             | 85                             | 3       | 515     | 1461            | 25                |
| 3   | 56.39 | 40     | 19                             | 76                             | 2       | 448     | 1461            | 18                |
| 4   | 69.26 | 50     | 27                             | 88                             | 4       | 529     | 1461            | 10                |
| 5   | 57.73 | 41     | 20                             | 77                             | 4       | 446     | 1461            | 9                 |
| 6   | 64.46 | 51     | 32                             | 79.5                           | 6       | 350     | 1461            | 13                |
| 7   | 62.85 | 50     | 30                             | 78                             | 4       | 409     | 1461            | 38                |
| 8   | 68.35 | 54     | 34                             | 83.5                           | 7       | 408     | 1461            | 37                |
| 9   | 64.46 | 51     | 32                             | 79.5                           | 6       | 350     | 1461            | 13                |
| 10  | 65.52 | 51     | 32                             | 81                             | 7       | 410     | 1461            | 34                |
| 11  | 86.31 | 61     | 38                             | 107                            | 5       | 708     | 1461            | 37                |
| 12  | 63.99 | 52     | 37                             | 76                             | 6       | 421     | 1461            | 18                |
| 13  | 61.01 | 50     | 30                             | 79                             | 2       | 290     | 1461            | 24                |
| 14  | 60.51 | 49     | 32                             | 76                             | 7       | 390     | 1461            | 70                |
| 15  | 46.19 | 40     | 29                             | 55                             | 7       | 276     | 1461            | 44                |
| 16  | 22.9  | 18     | 12                             | 29                             | 3       | 187     | 1461            | 59                |
| 17  | 54.55 | 41     | 26                             | 68                             | 3       | 932     | 1461            | 14                |
| 18  | 40.93 | 32     | 20                             | 50                             | 5       | 450     | 1461            | 16                |
| 19  | 44.97 | 35     | 22                             | 56                             | 6       | 353     | 1461            | 39                |
| 20  | 48.8  | 37     | 24                             | 59                             | 6       | 508     | 1461            | 15                |
| 21  | 45.3  | 31     | 19                             | 55                             | 3       | 612     | 1461            | 27                |
| 22  | 30.54 | 22     | 14                             | 39                             | 2       | 308     | 1461            | 17                |
| 23  | 45.36 | 34     | 21                             | 58                             | 3       | 378     | 1461            | 24                |
| 24  | 54.24 | 33     | 21                             | 66                             | 5       | 730     | 1461            | 24                |
| 25  | 39.52 | 29     | 18                             | 49                             | 3       | 502     | 1461            | 78                |
| 26  | 42.91 | 36     | 22                             | 55                             | 4       | 235     | 1461            | 24                |
| 27  | 44.22 | 36     | 22                             | 58                             | 5       | 225     | 1461            | 60                |
| 28  | 44.97 | 38     | 24                             | 58                             | 5       | 218     | 1461            | 22                |
| 29  | 44.32 | 37     | 23                             | 57                             | 6       | 224     | 1461            | 12                |
| 30* | 49.23 | 40     | 28                             | 62                             | 10      | 271     | 797             | 1                 |
| 31  | 52.7  | 42     | 27                             | 67                             | 7       | 284     | 1461            | 9                 |
| 32  | 51.19 | 43     | 28                             | 64                             | 3       | 250     | 1461            | 40                |
| 33  | 49.98 | 44     | 31                             | 61                             | 6       | 259     | 1461            | 26                |
| 34  | 47.59 | 40     | 27                             | 59                             | 3       | 233     | 1461            | 30                |
| 35  | 27.35 | 25     | 17                             | 35                             | 2       | 114     | 1461            | 46                |
| 36  | 26.16 | 22     | 14                             | 34                             | 2       | 233     | 1461            | 5                 |
| 37* | 32.18 | 25     | 14                             | 45                             | 4       | 155     | 650             | 15                |
| 38  | 45.33 | 40     | 29                             | 57                             | 9       | 209     | 1461            | 32                |
| 39  | 49.12 | 44     | 31                             | 62                             | 3       | 356     | 1461            | 27                |
| 40  | 74.08 | 60     | 40                             | 92                             | 7       | 431     | 1461            | 22                |
| 41  | 56.81 | 46     | 31                             | 70                             | 7       | 327     | 1461            | 44                |
| 42* | 70.49 | 57     | 40                             | 82                             | 6       | 514     | 797             | 56                |
| 43* | 56.69 | 46     | 34                             | 65                             | 14      | 257     | 606             | 15                |
| 44  | 69.96 | 53     | 35                             | 88                             | 5       | 548     | 1461            | 57                |
| 45  | 62    | 50     | 31                             | 81                             | 3       | 275     | 1461            | 20                |
| 46  | 44.01 | 38     | 26                             | 56                             | 5       | 195     | 1461            | 31                |
| 47  | 48.13 | 43     | 29                             | 61                             | 6       | 478     | 1461            | 43                |
| 48  | 51.57 | 43     | 29                             | 65                             | 5       | 289     | 1461            | 10                |
| 49  | 39.33 | 33     | 23                             | 50                             | 6       | 214     | 1461            | 12                |



|    |     |       |      |    |    |    |     |      |     |
|----|-----|-------|------|----|----|----|-----|------|-----|
| 1  |     |       |      |    |    |    |     |      |     |
| 2  |     |       |      |    |    |    |     |      |     |
| 3  | 50  | 32.84 | 29   | 20 | 42 | 5  | 121 | 1461 | 22  |
| 4  | 51  | 32.48 | 28   | 18 | 43 | 5  | 149 | 1461 | 35  |
| 5  | 52  | 27.19 | 24   | 14 | 36 | 3  | 120 | 1461 | 31  |
| 6  | 53  | 38.01 | 33   | 21 | 49 | 5  | 192 | 1461 | 16  |
| 7  | 54  | 35.67 | 30   | 19 | 46 | 3  | 269 | 1461 | 13  |
| 8  | 55  | 50.36 | 42   | 27 | 64 | 6  | 286 | 1461 | 23  |
| 9  | 56  | 44.34 | 35   | 23 | 56 | 5  | 333 | 1461 | 6   |
| 10 | 57  | 35.14 | 29   | 16 | 47 | 3  | 202 | 1461 | 22  |
| 11 | 58  | 22.1  | 18   | 14 | 27 | 3  | 123 | 1461 | 31  |
| 12 | 59  | 15.14 | 13   | 9  | 18 | 2  | 68  | 1461 | 12  |
| 13 | 60* | 37.75 | 29   | 18 | 47 | 5  | 183 | 773  | 20  |
| 14 | 61  | 49.89 | 41   | 30 | 61 | 8  | 222 | 1461 | 27  |
| 15 | 62  | 60.72 | 49   | 32 | 77 | 5  | 353 | 1461 | 8   |
| 16 | 63  | 42.87 | 36   | 24 | 55 | 5  | 215 | 1461 | 16  |
| 17 | 64  | 49.35 | 40   | 24 | 65 | 3  | 235 | 1461 | 13  |
| 18 | 65  | 32.64 | 28   | 18 | 42 | 4  | 195 | 1461 | 23  |
| 19 | 66  | 30.96 | 28   | 21 | 39 | 7  | 123 | 1461 | 10  |
| 20 | 67  | 29.79 | 28   | 20 | 36 | 7  | 102 | 1461 | 23  |
| 21 | 68  | 13.86 | 14   | 12 | 15 | 3  | 51  | 1461 | 109 |
| 22 | 69  | 25.99 | 19   | 13 | 32 | 5  | 187 | 1461 | 33  |
| 23 | 70  | 24.49 | 19   | 13 | 30 | 2  | 124 | 1461 | 156 |
| 24 | 71  | 11.95 | 10   | 7  | 15 | 2  | 88  | 1461 | 87  |
| 25 | 72  | 51.21 | 42   | 30 | 63 | 10 | 239 | 1461 | 238 |
| 26 | 73  | 10.62 | 9    | 7  | 13 | 4  | 73  | 1461 | 46  |
| 27 | 74  | 53.8  | 41.5 | 28 | 64 | 5  | 328 | 1461 | 19  |
| 28 | 75  | 38.88 | 32   | 23 | 47 | 4  | 169 | 1461 | 27  |
| 29 | 76  | 44.45 | 36   | 24 | 57 | 4  | 581 | 1461 | 59  |
| 30 | 77  | 44.1  | 36   | 25 | 53 | 5  | 287 | 1461 | 44  |
| 31 | 78* | 44.04 | 38   | 27 | 56 | 9  | 139 | 488  | 27  |
| 32 | 79  | 55.15 | 45   | 30 | 68 | 5  | 363 | 1461 | 14  |
| 33 | 80  | 44.69 | 36   | 24 | 55 | 5  | 219 | 1461 | 50  |
| 34 | 81  | 65.37 | 34   | 20 | 85 | 5  | 447 | 1461 | 97  |
| 35 | 82  | 57.76 | 29   | 19 | 70 | 3  | 414 | 1461 | 58  |
| 36 | 83  | 51.7  | 26   | 14 | 65 | 3  | 406 | 1461 | 42  |

17 Note:  
 18 \* Monitors being available after 2015  
 19 Total: Number of days of assigned monitors being available during 2015-2018  
 20 Missing: Number of days with missing PM<sub>2.5</sub> concentration during 2015-2018  
 21

1  
2  
3  
4  
5  
6  
7  
8  
9  
10  
11  
12  
13  
14  
15  
16  
17  
18  
19  
20  
21  
22  
23  
24  
25  
26  
27  
28  
29  
30  
31  
32  
33  
34  
35  
36  
37  
38  
39  
40  
41  
42  
43  
44  
45  
46  
47  
48  
49  
50  
51  
52  
53  
54  
55  
56  
57  
58  
59  
60

22 **Supplement 3. Distribution of the sites.**

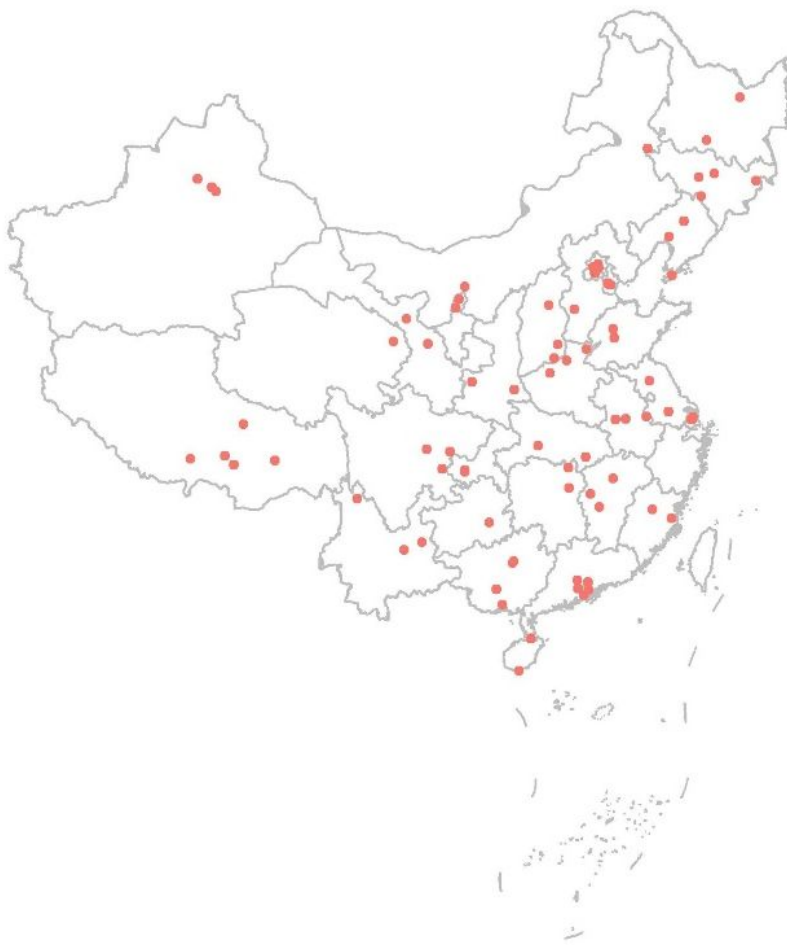

23  
24

only

25 **Supplement 4. Characteristics of the study population.**

| Variable                                                        | Total<br>(n=883,827) |
|-----------------------------------------------------------------|----------------------|
| <b>Socio-demographics</b>                                       |                      |
| Age, mean (SD), years                                           | 55.5 (10.1)          |
| Female, n (%)                                                   | 533897 (60.4)        |
| Urban residence, n (%)                                          | 657608 (74.4)        |
| Han ethnic group, n (%)                                         | 805479 (91.1)        |
| College or above                                                | 102764 (11.6)        |
| <b>Regions, n (%)</b>                                           |                      |
| Eastern                                                         | 325253 (36.8)        |
| Central                                                         | 178435 (20.2)        |
| Western                                                         | 311599 (35.3)        |
| NorthEastern                                                    | 68540 (7.8)          |
| <b>Cardiovascular risk factors, n (%)</b>                       |                      |
| Obesity                                                         | 142150 (16.1)        |
| Current drinker                                                 | 194967 (22.1)        |
| Diabetes                                                        | 173950 (19.7)        |
| Current smoker                                                  | 161006 (18.2)        |
| Hypertension                                                    | 381223 (43.1)        |
| <b>Blood pressures</b>                                          |                      |
| Systolic blood pressure, mean (SD)                              | 143.5 (22.2)         |
| Diastolic blood pressure, mean (SD)                             | 83.1 (12.3)          |
| <b>PM<sub>2.5</sub> exposures</b>                               |                      |
| 1-y average PM <sub>2.5</sub> exposure, mean (SD)               | 49.2 (16.4)          |
| Above WHO Interim Target 1 (IT-1, 35 µg/m <sup>3</sup> ), n (%) | 706415 (79.9)        |
| Above WHO Interim Target 2 (IT-2, 25 µg/m <sup>3</sup> ), n (%) | 842356 (95.3)        |
| Above WHO Interim Target 3 (IT-3, 15 µg/m <sup>3</sup> ), n (%) | 864119 (97.8)        |

26

27

28 **Supplement 5. The effect of PM<sub>2.5</sub> exposure on hypertension prevalence.**

| Model                          | Per 10 µg/m <sup>3</sup> PM <sub>2.5</sub> increment |         |
|--------------------------------|------------------------------------------------------|---------|
|                                | Odds ratios (95% confidence intervals)               | p-Value |
| <b>Hypertension prevalence</b> |                                                      |         |
| Model 1                        | 1.10 (1.09-1.11)                                     | <0.001  |
| Model 2                        | 1.10 (1.09-1.11)                                     | <0.001  |
| Model 3                        | 1.09 (1.08-1.10)                                     | <0.001  |
| Model 4*                       | 1.09 (1.08-1.10)                                     | <0.001  |
| Model 5*                       | 1.04 (1.02-1.05)                                     | <0.001  |
| Model 6*                       | 1.04 (1.02-1.05)                                     | <0.001  |

29 **\*Sensitivity analysis**

30 Model 1: Included age and sex;

31 Model 2: Model 1 + education level and urbanity;

32 Model 3: Model 2 + smoking status, alcohol consumption, obesity, and diabetes;

33 Model 4: Model 3 + day of week of the medical examination;

34 Model 5: Model 3 + season of the medical examination;

35 Model 6: Model 3 + day of week + season.

36

37 **Supplement 6. Concentration-response functions of the long-term exposure to PM<sub>2.5</sub>**  
 38 **with hypertension prevalence in the sensitivity analysis.**

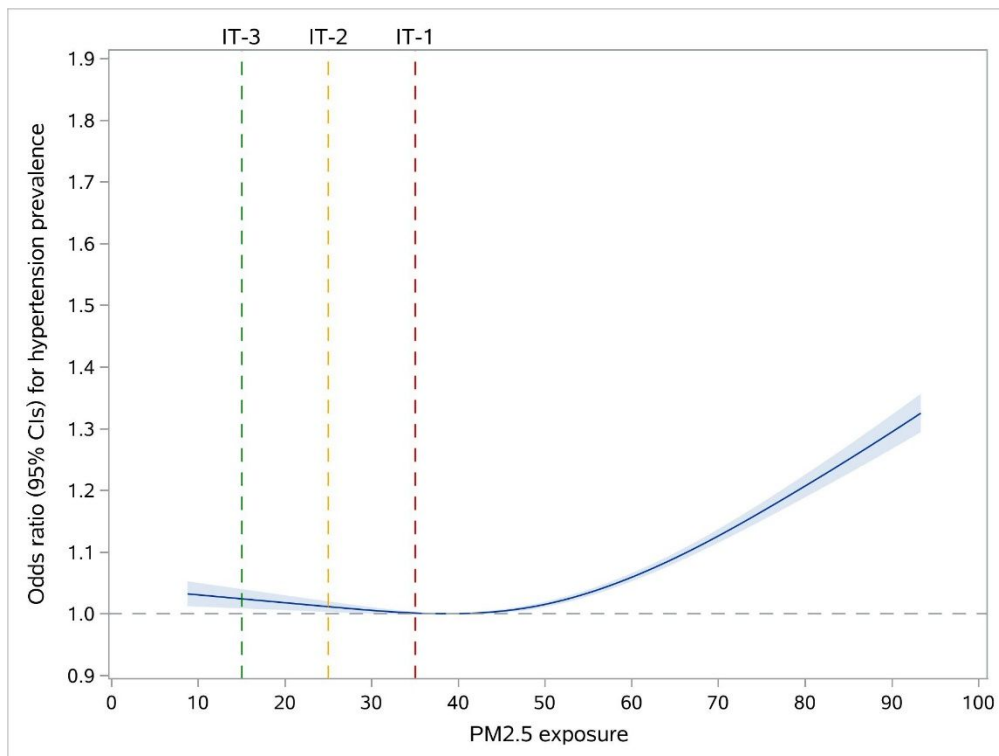

39  
 40 Effect estimates were presented as adjusted odds ratios for hypertension prevalence  
 41 compared to individuals with PM<sub>2.5</sub> exposure 38.5 µg/m<sup>3</sup>.

42  
 43 The dashed lines represent the air-quality standards for annual average concentrations of  
 44 PM<sub>2.5</sub> according to the World Health Organization (WHO) Interim Target 1 (IT-1), WHO  
 45 Interim Target 2 (IT-2), WHO Interim Target 3 (IT-3).

46  
 47 Covariates of the model including age, sex, education level, urbanity, smoking status,  
 48 alcohol consumption, obesity, diabetes, as well as the day of week and season of blood  
 49 pressure measurement.

50 **Supplement 7. The effect of PM<sub>2.5</sub> exposure on blood pressure.**

| Model                           | Per 10 µg/m <sup>3</sup> PM <sub>2.5</sub> increment |         |
|---------------------------------|------------------------------------------------------|---------|
|                                 | mmHg (95% confidence intervals)                      | p-value |
| <b>Systolic blood pressure</b>  |                                                      |         |
| Model 1                         | 0.58 (0.49-0.67)                                     | <0.001  |
| Model 2                         | 0.57 (0.48-0.66)                                     | <0.001  |
| Model 3                         | 0.45 (0.36-0.54)                                     | <0.001  |
| Model 4                         | 0.50 (0.41-0.59)                                     | <0.001  |
| Model 5*                        | 0.50 (0.41-0.59)                                     | <0.001  |
| Model 6*                        | 0.19 (0.10-0.28)                                     | <0.001  |
| Model 7*                        | 0.19 (0.10-0.28)                                     | <0.001  |
| <b>Diastolic blood pressure</b> |                                                      |         |
| Model 1                         | 0.29 (0.23-0.34)                                     | <0.001  |
| Model 2                         | 0.28 (0.23-0.34)                                     | <0.001  |
| Model 3                         | 0.21 (0.15-0.26)                                     | <0.001  |
| Model 4                         | 0.23 (0.18-0.28)                                     | <0.001  |
| Model 5*                        | 0.23 (0.18-0.28)                                     | <0.001  |
| Model 6*                        | 0.13 (0.08-0.18)                                     | <0.001  |
| Model 7*                        | 0.13 (0.08-0.18)                                     | <0.001  |

51 \*Sensitivity analysis

52

53 Model 1: Included age and sex;

54 Model 2: Model 1 + education level and urbanity;

55 Model 3: Model 2 + smoking status, alcohol consumption, obesity, and diabetes;

56 Model 4: Model 3 + use of antihypertensive medication;

57 Model 5: Model 4 + day of week of the medical examination;

58 Model 6: Model 3 + season of the medical examination;

59 Model 7: Model 3 + day of week + season.

60

61 **Supplement 8. Concentration-response functions of the long-term exposure to PM<sub>2.5</sub>**  
 62 **with systolic blood pressure (SBP) and diastolic blood pressure (DBP) in the**  
 63 **sensitivity analysis.**

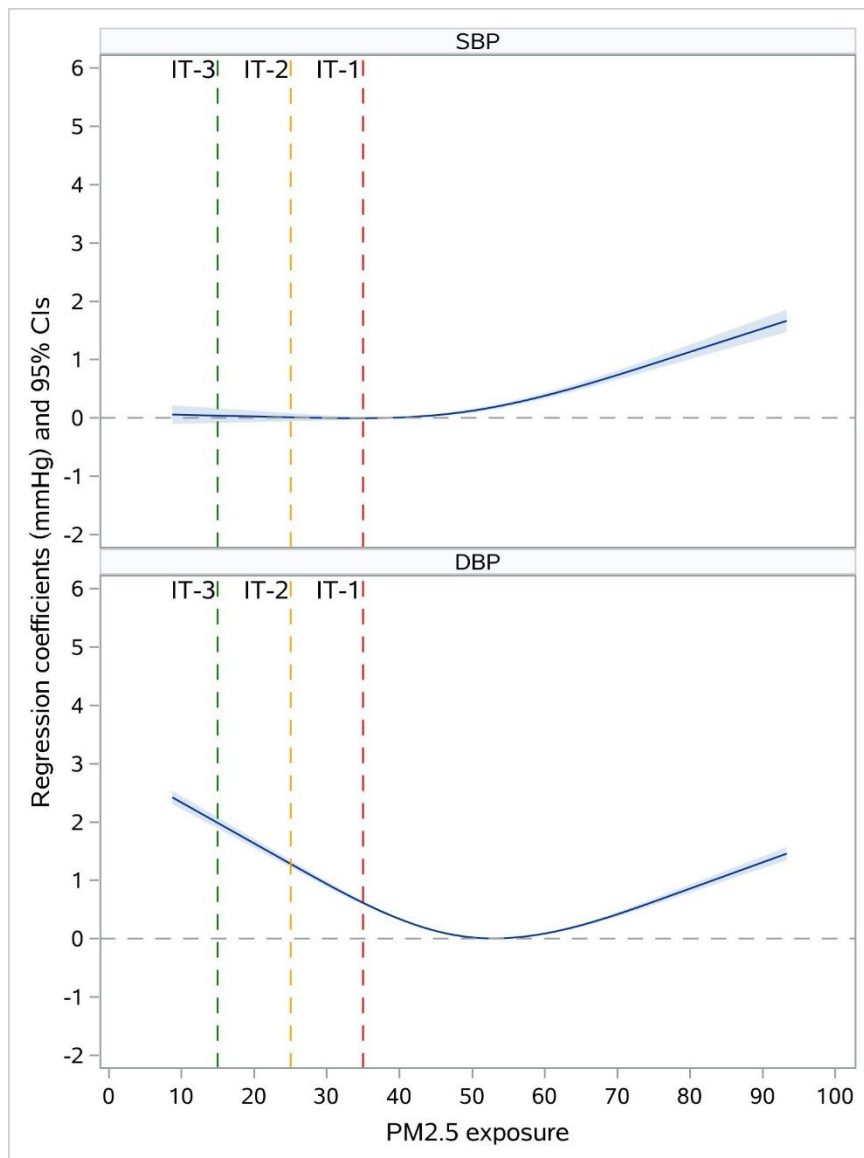

64  
 65 Effect estimates (regression coefficients) were presented as changes in SBP compared to  
 66 individuals with PM<sub>2.5</sub> exposure 39 µg/m<sup>3</sup> and changes in DBP compared to individuals with  
 67 PM<sub>2.5</sub> exposure 53 µg/m<sup>3</sup>.

68  
 69 The dashed lines represent the air-quality standards for annual average concentrations of  
 70 PM<sub>2.5</sub> according to the World Health Organization (WHO) Interim Target 1 (IT-1), WHO  
 71 Interim Target 2 (IT-2), WHO Interim Target 3 (IT-3).

72  
 73 Covariates of the model including age, sex, education level, urbanity, smoking status,  
 74 alcohol consumption, obesity, diabetes, and use of antihypertensive medications, as well as  
 75 the day of week and season of blood pressure measurement.

STROBE Statement—Checklist of items that should be included in reports of *cross-sectional studies*

|                              | Item No                                                                            | Recommendation                                                                                                                                                                                    | Page No |
|------------------------------|------------------------------------------------------------------------------------|---------------------------------------------------------------------------------------------------------------------------------------------------------------------------------------------------|---------|
| <b>Title and abstract</b>    | 1                                                                                  | (a) Indicate the study's design with a commonly used term in the title or the abstract                                                                                                            | 3       |
|                              |                                                                                    | (b) Provide in the abstract an informative and balanced summary of what was done and what was found                                                                                               | 3       |
| <b>Introduction</b>          |                                                                                    |                                                                                                                                                                                                   |         |
| Background/rationale         | 2                                                                                  | Explain the scientific background and rationale for the investigation being reported                                                                                                              | 6       |
| Objectives                   | 3                                                                                  | State specific objectives, including any prespecified hypotheses                                                                                                                                  | 7       |
| <b>Methods</b>               |                                                                                    |                                                                                                                                                                                                   |         |
| Study design                 | 4                                                                                  | Present key elements of study design early in the paper                                                                                                                                           | 7       |
| Setting                      | 5                                                                                  | Describe the setting, locations, and relevant dates, including periods of recruitment, exposure, follow-up, and data collection                                                                   | 7       |
| Participants                 | 6                                                                                  | (a) Give the eligibility criteria, and the sources and methods of selection of participants                                                                                                       | 7       |
| Variables                    | 7                                                                                  | Clearly define all outcomes, exposures, predictors, potential confounders, and effect modifiers. Give diagnostic criteria, if applicable                                                          | 8       |
| Data sources/<br>measurement | 8*                                                                                 | For each variable of interest, give sources of data and details of methods of assessment (measurement). Describe comparability of assessment methods if there is more than one group              | 7-8     |
| Bias                         | 9                                                                                  | Describe any efforts to address potential sources of bias                                                                                                                                         | 9       |
| Study size                   | 10                                                                                 | Explain how the study size was arrived at                                                                                                                                                         | 8       |
| Quantitative variables       | 11                                                                                 | Explain how quantitative variables were handled in the analyses. If applicable, describe which groupings were chosen and why                                                                      | 9       |
| Statistical methods          | 12                                                                                 | (a) Describe all statistical methods, including those used to control for confounding                                                                                                             | 9-10    |
|                              |                                                                                    | (b) Describe any methods used to examine subgroups and interactions                                                                                                                               | 10      |
|                              | (c) Explain how missing data were addressed                                        | 8                                                                                                                                                                                                 |         |
|                              | (d) If applicable, describe analytical methods taking account of sampling strategy | 9-10                                                                                                                                                                                              |         |
|                              | (e) Describe any sensitivity analyses                                              | 10                                                                                                                                                                                                |         |
| <b>Results</b>               |                                                                                    |                                                                                                                                                                                                   |         |
| Participants                 | 13*                                                                                | (a) Report numbers of individuals at each stage of study—eg numbers potentially eligible, examined for eligibility, confirmed eligible, included in the study, completing follow-up, and analysed | 10      |
|                              |                                                                                    | (b) Give reasons for non-participation at each stage                                                                                                                                              | 7-8     |
|                              |                                                                                    | (c) Consider use of a flow diagram                                                                                                                                                                | 7-8     |
| Descriptive data             | 14*                                                                                | (a) Give characteristics of study participants (eg demographic, clinical, social) and information on exposures and potential confounders                                                          | 10-11   |
|                              |                                                                                    | (b) Indicate number of participants with missing data for each variable of interest                                                                                                               | 7-8     |
| Outcome data                 | 15*                                                                                | Report numbers of outcome events or summary measures                                                                                                                                              | 10-11   |



|    |                          |    |                                                                                                                                                                                                              |
|----|--------------------------|----|--------------------------------------------------------------------------------------------------------------------------------------------------------------------------------------------------------------|
| 1  |                          |    |                                                                                                                                                                                                              |
| 2  | Main results             | 16 | (a) Give unadjusted estimates and, if applicable, confounder-adjusted estimates and their precision (eg, 95% confidence interval). Make clear which confounders were adjusted for and why they were included |
| 3  |                          |    | 11-12                                                                                                                                                                                                        |
| 4  |                          |    |                                                                                                                                                                                                              |
| 5  |                          |    |                                                                                                                                                                                                              |
| 6  |                          |    | (b) Report category boundaries when continuous variables were categorized                                                                                                                                    |
| 7  |                          |    | 10-11                                                                                                                                                                                                        |
| 8  |                          |    |                                                                                                                                                                                                              |
| 9  |                          |    | (c) If relevant, consider translating estimates of relative risk into absolute risk for a meaningful time period                                                                                             |
| 10 |                          |    | NA                                                                                                                                                                                                           |
| 11 | Other analyses           | 17 | Report other analyses done—eg analyses of subgroups and interactions, and sensitivity analyses                                                                                                               |
| 12 |                          |    | 12                                                                                                                                                                                                           |
| 13 |                          |    |                                                                                                                                                                                                              |
| 14 | <b>Discussion</b>        |    |                                                                                                                                                                                                              |
| 15 | Key results              | 18 | Summarise key results with reference to study objectives                                                                                                                                                     |
| 16 |                          |    | 13                                                                                                                                                                                                           |
| 17 | Limitations              | 19 | Discuss limitations of the study, taking into account sources of potential bias or imprecision. Discuss both direction and magnitude of any potential bias                                                   |
| 18 |                          |    | 16                                                                                                                                                                                                           |
| 19 |                          |    |                                                                                                                                                                                                              |
| 20 | Interpretation           | 20 | Give a cautious overall interpretation of results considering objectives, limitations, multiplicity of analyses, results from similar studies, and other relevant evidence                                   |
| 21 |                          |    | 13-16                                                                                                                                                                                                        |
| 22 |                          |    |                                                                                                                                                                                                              |
| 23 |                          |    |                                                                                                                                                                                                              |
| 24 | Generalisability         | 21 | Discuss the generalisability (external validity) of the study results                                                                                                                                        |
| 25 |                          |    | 15-16                                                                                                                                                                                                        |
| 26 |                          |    |                                                                                                                                                                                                              |
| 27 | <b>Other information</b> |    |                                                                                                                                                                                                              |
| 28 | Funding                  | 22 | Give the source of funding and the role of the funders for the present study and, if applicable, for the original study on which the present article is based                                                |
| 29 |                          |    | 17                                                                                                                                                                                                           |
| 30 |                          |    |                                                                                                                                                                                                              |
| 31 |                          |    |                                                                                                                                                                                                              |
| 32 |                          |    |                                                                                                                                                                                                              |

\*Give information separately for exposed and unexposed groups.

**Note:** An Explanation and Elaboration article discusses each checklist item and gives methodological background and published examples of transparent reporting. The STROBE checklist is best used in conjunction with this article (freely available on the Web sites of PLoS Medicine at <http://www.plosmedicine.org/>, Annals of Internal Medicine at <http://www.annals.org/>, and Epidemiology at <http://www.epidem.com/>). Information on the STROBE Initiative is available at [www.strobe-statement.org](http://www.strobe-statement.org).

# BMJ Open

## Association of long-term exposure to PM<sub>2.5</sub> with hypertension prevalence and blood pressure in China: a cross-sectional study

|                                 |                                                                                                                                                                                                                                                                                                                                                                                                                                                                                                                                                                                                                                                                                                                                                                                                                                                                                                                                                                                                                                                                                                                                                                                                                                                                                                                                                                                                                                                                                                                                                                                                                                                                                                                                                                                                                                                         |
|---------------------------------|---------------------------------------------------------------------------------------------------------------------------------------------------------------------------------------------------------------------------------------------------------------------------------------------------------------------------------------------------------------------------------------------------------------------------------------------------------------------------------------------------------------------------------------------------------------------------------------------------------------------------------------------------------------------------------------------------------------------------------------------------------------------------------------------------------------------------------------------------------------------------------------------------------------------------------------------------------------------------------------------------------------------------------------------------------------------------------------------------------------------------------------------------------------------------------------------------------------------------------------------------------------------------------------------------------------------------------------------------------------------------------------------------------------------------------------------------------------------------------------------------------------------------------------------------------------------------------------------------------------------------------------------------------------------------------------------------------------------------------------------------------------------------------------------------------------------------------------------------------|
| Journal:                        | <i>BMJ Open</i>                                                                                                                                                                                                                                                                                                                                                                                                                                                                                                                                                                                                                                                                                                                                                                                                                                                                                                                                                                                                                                                                                                                                                                                                                                                                                                                                                                                                                                                                                                                                                                                                                                                                                                                                                                                                                                         |
| Manuscript ID                   | bmjopen-2021-050159.R2                                                                                                                                                                                                                                                                                                                                                                                                                                                                                                                                                                                                                                                                                                                                                                                                                                                                                                                                                                                                                                                                                                                                                                                                                                                                                                                                                                                                                                                                                                                                                                                                                                                                                                                                                                                                                                  |
| Article Type:                   | Original research                                                                                                                                                                                                                                                                                                                                                                                                                                                                                                                                                                                                                                                                                                                                                                                                                                                                                                                                                                                                                                                                                                                                                                                                                                                                                                                                                                                                                                                                                                                                                                                                                                                                                                                                                                                                                                       |
| Date Submitted by the Author:   | 27-Sep-2021                                                                                                                                                                                                                                                                                                                                                                                                                                                                                                                                                                                                                                                                                                                                                                                                                                                                                                                                                                                                                                                                                                                                                                                                                                                                                                                                                                                                                                                                                                                                                                                                                                                                                                                                                                                                                                             |
| Complete List of Authors:       | <p>Song, Jiali; Chinese Academy of Medical Sciences &amp; Peking Union Medical College Fuwai Hospital, National Clinical Research Center for Cardiovascular Diseases</p> <p>Gao, Yan; Chinese Academy of Medical Sciences &amp; Peking Union Medical College Fuwai Hospital, National Clinical Research Center for Cardiovascular Diseases</p> <p>Hu, Shuang; Chinese Academy of Medical Sciences &amp; Peking Union Medical College Fuwai Hospital, National Clinical Research Center for Cardiovascular Diseases</p> <p>Medda, Emanuela; Istituto Superiore di Sanità, Reference Centre for Behavioural Sciences and Mental Health</p> <p>Tang, Guigang; Ministry of Ecology and Environment of the People's Republic of China, China National Environmental Monitoring Centre</p> <p>Zhang, Di; Ministry of Ecology and Environment of the People's Republic of China, China National Environmental Monitoring Centre</p> <p>Zhang, Wenbo; Chinese Academy of Medical Sciences &amp; Peking Union Medical College Fuwai Hospital, National Clinical Research Center for Cardiovascular Diseases</p> <p>Li, Xi; Chinese Academy of Medical Sciences &amp; Peking Union Medical College Fuwai Hospital, National Clinical Research Center for Cardiovascular Diseases</p> <p>Li, Jing; Chinese Academy of Medical Sciences &amp; Peking Union Medical College Fuwai Hospital, National Clinical Research Center for Cardiovascular Diseases</p> <p>Renzi, Matteo; Department of Epidemiology of the Regional Health Service Lazio, Epidemiology,</p> <p>Stazi, Maria Antonietta; Istituto Superiore di Sanità, Reference Centre for Behavioural Sciences and Mental Health</p> <p>Zheng, Xin; Chinese Academy of Medical Sciences &amp; Peking Union Medical College Fuwai Hospital, National Clinical Research Center for Cardiovascular Diseases</p> |
| <b>Primary Subject Heading</b>: | Public health                                                                                                                                                                                                                                                                                                                                                                                                                                                                                                                                                                                                                                                                                                                                                                                                                                                                                                                                                                                                                                                                                                                                                                                                                                                                                                                                                                                                                                                                                                                                                                                                                                                                                                                                                                                                                                           |
| Secondary Subject Heading:      | Epidemiology, Public health                                                                                                                                                                                                                                                                                                                                                                                                                                                                                                                                                                                                                                                                                                                                                                                                                                                                                                                                                                                                                                                                                                                                                                                                                                                                                                                                                                                                                                                                                                                                                                                                                                                                                                                                                                                                                             |
| Keywords:                       | Epidemiology < TROPICAL MEDICINE, Public health < INFECTIOUS DISEASES, Hypertension < CARDIOLOGY                                                                                                                                                                                                                                                                                                                                                                                                                                                                                                                                                                                                                                                                                                                                                                                                                                                                                                                                                                                                                                                                                                                                                                                                                                                                                                                                                                                                                                                                                                                                                                                                                                                                                                                                                        |

1  
2  
3  
4  
5  
6  
7  
8  
9  
10  
11  
12  
13  
14  
15  
16  
17  
18  
19  
20  
21  
22  
23  
24  
25  
26  
27  
28  
29  
30  
31  
32  
33  
34  
35  
36  
37  
38  
39  
40  
41  
42  
43  
44  
45  
46  
47  
48  
49  
50  
51  
52  
53  
54  
55  
56  
57  
58  
59  
60



SCHOLARONE™  
Manuscripts



I, the Submitting Author has the right to grant and does grant on behalf of all authors of the Work (as defined in the below author licence), an exclusive licence and/or a non-exclusive licence for contributions from authors who are: i) UK Crown employees; ii) where BMJ has agreed a CC-BY licence shall apply, and/or iii) in accordance with the terms applicable for US Federal Government officers or employees acting as part of their official duties; on a worldwide, perpetual, irrevocable, royalty-free basis to BMJ Publishing Group Ltd ("BMJ") its licensees and where the relevant Journal is co-owned by BMJ to the co-owners of the Journal, to publish the Work in this journal and any other BMJ products and to exploit all rights, as set out in our [licence](#).

The Submitting Author accepts and understands that any supply made under these terms is made by BMJ to the Submitting Author unless you are acting as an employee on behalf of your employer or a postgraduate student of an affiliated institution which is paying any applicable article publishing charge ("APC") for Open Access articles. Where the Submitting Author wishes to make the Work available on an Open Access basis (and intends to pay the relevant APC), the terms of reuse of such Open Access shall be governed by a Creative Commons licence – details of these licences and which [Creative Commons](#) licence will apply to this Work are set out in our licence referred to above.

Other than as permitted in any relevant BMJ Author's Self Archiving Policies, I confirm this Work has not been accepted for publication elsewhere, is not being considered for publication elsewhere and does not duplicate material already published. I confirm all authors consent to publication of this Work and authorise the granting of this licence.

**TITLE PAGE****Association of long-term exposure to PM<sub>2.5</sub> with hypertension prevalence and blood pressure in China: a cross-sectional study****Authors**

Jiali Song\*, MD; Yan Gao\*, MSc; Shuang Hu, PhD; Emanuela Medda, MSc; Guigang Tang, MSc; Di Zhang, MSc; Wenbo Zhang, MPH; Xi Li, MD, PhD; Jing Li, MD, PhD; Matteo Renzi, MSc; Maria Antonietta Stazi, MSc; Xin Zheng†, MD, PhD

\*Joint first authors

†Corresponding author

**Author Affiliations**

National Clinical Research Center for Cardiovascular Diseases, NHC Key Laboratory of Clinical Research for Cardiovascular Medications, State Key Laboratory of Cardiovascular Disease, Fuwai Hospital, Chinese Academy of Medical Sciences and Peking Union Medical College, National Center for Cardiovascular Diseases (Song, Gao, Hu, W. Zhang, X. Li, J. Li, Zheng); Reference Centre for Behavioural Sciences and Mental Health, Istituto Superiore di Sanità, Rome, Italy (Medda, Stazi); Department of Epidemiology of Lazio Region, Rome, Italy (Renzi); China National Environmental Monitoring Centre, State Environmental Protection Key Laboratory of Quality Control in Environmental Monitoring, Ministry of Ecology and Environment of the People's Republic of China (Tang, D. Zhang)

**Correspondence**

Dr. Xin Zheng, National Clinical Research Center for Cardiovascular Diseases, Fuwai Hospital,  
167 Beilishi Road, Beijing 100037, People's Republic of China; Tel: +86 010 6086 6719; Email:  
xin.zheng@fwoxford.org

**Word count:** 3,044 words (main text)

**Number of figures:** 4

For peer review only

## ABSTRACT

**Objective:** Evidence of the effects of long-term fine particulate matter (PM<sub>2.5</sub>) exposure on hypertension and blood pressure is limited for populations exposed to high levels of PM<sub>2.5</sub>. We aim to assess associations of long-term exposure to PM<sub>2.5</sub> with hypertension prevalence and blood pressure, and further explore the subpopulation differences and effect modification by participant characteristics in these associations in China.

**Methods:** We analyzed cross-sectional data from 883,827 participants aged 35–75 years in the China Patient-Centered Evaluative Assessment of Cardiac Events (PEACE) Million Persons Project. Data from the monitoring station was used to estimate the one-year average concentration of PM<sub>2.5</sub>. The associations of PM<sub>2.5</sub> exposure with hypertension prevalence and blood pressure were investigated by generalized linear models, with PM<sub>2.5</sub> included as either linear or spline functions.

**Results:** The 1-year PM<sub>2.5</sub> exposure of the study population ranged from 8.8 to 93.8 µg/m<sup>3</sup> (mean 49.2 µg/m<sup>3</sup>). The adjusted odds ratio of hypertension prevalence related to a 10 µg/m<sup>3</sup> increase in one-year PM<sub>2.5</sub> exposure was 1.04 (95% confidence interval, 1.02–1.05). Each 10 µg/m<sup>3</sup> increment in PM<sub>2.5</sub> exposure was associated with increases of 0.19 mmHg (95% confidence interval, 0.10–0.28) and 0.13 mmHg (95% confidence interval, 0.08–0.18) in systolic blood pressure and diastolic blood pressure, respectively. The concentration-response curves for hypertension prevalence and systolic blood pressure showed steeper slopes at higher PM<sub>2.5</sub> levels; while the curve for diastolic blood pressure was U-shaped. The elderly, men, non-current smokers, and obese participants were more susceptible to the exposure of PM<sub>2.5</sub>.

1  
2  
3  
4 **Conclusions:** Long-term exposure to PM<sub>2.5</sub> is associated with higher blood pressure and  
5  
6 increased risk of hypertension prevalence. The effects of PM<sub>2.5</sub> on hypertension prevalence  
7  
8 become more pronounced at higher PM<sub>2.5</sub> levels. These findings emphasize the need to  
9  
10 reduce air pollution, especially in areas with severe air pollution.  
11  
12  
13  
14  
15  
16

17 **Keywords:** Air pollution; Blood pressure; Hypertension  
18  
19  
20  
21  
22  
23  
24  
25  
26  
27  
28  
29  
30  
31  
32  
33  
34  
35  
36  
37  
38  
39  
40  
41  
42  
43  
44  
45  
46  
47  
48  
49  
50  
51  
52  
53  
54  
55  
56  
57  
58  
59  
60

For peer review only



### Strengths and limitations of this study

- The large size of our study allowed us to comprehensively assess these associations among a diverse spectrum of population across a wider range of PM<sub>2.5</sub> concentrations in China.
- The large number of participants with hypertension and high level of PM<sub>2.5</sub> exposure (e.g. >35 µg/m<sup>3</sup>), enabled us to examine these associations with greater precision and sufficient statistical power.
- Given the nature of the cross-sectional study design, the causal relationship could not be established.
- A selection bias is possible because our analysis was restricted to participants with available PM<sub>2.5</sub> data.

## 1 INTRODUCTION

2 Hypertension is the leading risk factor for death globally.<sup>1</sup> Although hypertension is a  
3 worldwide public health concern, three-quarters of the world's population with the condition  
4 are living in low- and middle-income countries (LMICs).<sup>2</sup> The causes of hypertension are  
5 complex. Apart from genetic predisposition, social determinants, and lifestyle factors, air  
6 pollution, especially fine particulate matter with an aerodynamic diameter of 2.5 µm or less  
7 (PM<sub>2.5</sub>), may also contribute to increased risk for hypertension.<sup>3, 4</sup>

8  
9 Over the past few years, a growing body of epidemiological evidence indicated the  
10 association of long-term exposure to PM<sub>2.5</sub> with blood pressure and hypertension.<sup>5-10</sup>  
11 However, most of the studies were undertaken in high-income countries.<sup>8, 10</sup> Compared with  
12 high-income countries, exposure to PM<sub>2.5</sub> is substantially higher in LMICs. Furthermore, prior  
13 studies have largely focused on specific populations or regions.<sup>5-7</sup> Therefore, further studies  
14 are needed to assess the associations of PM<sub>2.5</sub> with blood pressure and prevalence of  
15 hypertension among a wider spectrum of populations with high PM<sub>2.5</sub> concentrations,  
16 especially in LMICs.

17  
18 China is experiencing a growing epidemic of hypertension and is estimated to have 300  
19 million individuals with hypertension by 2025.<sup>11</sup> Meanwhile, outdoor PM<sub>2.5</sub> has become one  
20 of China's most serious environmental problems with population-weighted annual means of  
21 PM<sub>2.5</sub> ranging from 19.1 µg/m<sup>3</sup> to 79.3 µg/m<sup>3</sup> in 2015.<sup>12</sup> A deeper understanding of the  
22 chronic health effects of PM<sub>2.5</sub> on hypertension prevalence and blood pressure in moderate

1  
2  
3  
4 23 to high PM<sub>2.5</sub> concentrations will help to develop policies to improve air quality and combat  
5  
6 24 the hypertension epidemic in China.  
7  
8

9 25  
10  
11 26 Accordingly, incorporating PM<sub>2.5</sub> data with a large-scale population-based screening project  
12  
13  
14 27 in China, the China Patient-Centered Evaluative Assessment of Cardiac Events (PEACE)  
15  
16  
17 28 Million Persons Project, we aimed to: (1) explore the association of long-term PM<sub>2.5</sub>  
18  
19 29 exposure with blood pressure level and hypertension prevalence, and evaluate  
20  
21  
22 30 subpopulation differences and effect modification by characteristics of participants in these  
23  
24  
25 31 associations; (2) assess the concentration-response relationships of long-term PM<sub>2.5</sub>  
26  
27 32 exposure with hypertension prevalence and blood pressure.  
28  
29

30 33

## 31 32 34 **METHODS**

### 33 34 35 **Study population**

35  
36  
37 36 Our study population is derived from the China PEACE Million Persons Project, which has  
38  
39  
40 37 been described previously.<sup>13</sup> In brief, we selected county-level regions using a convenience  
41  
42  
43 38 sampling strategy in all 31 provinces in mainland China from September 2014 to March  
44  
45  
46 39 2019. These regions are designated as rural counties or urban districts according to urban-  
47  
48  
49 40 rural division codes of the National Bureau of Statistics of China.<sup>14</sup> Local residents aged 35  
50  
51  
52 41 to 75 years, who were currently registered in the selected region's Hukou (a record officially  
53  
54  
55 42 identifying a person as a resident of an area) or had lived in the region for at least 6 of the  
56  
57  
58 43 previous 12 months, were enrolled in this project. After excluding participants with missing  
59  
60 44 data on education level (n=13,714), body mass index (n=321), or blood pressure

1  
2  
3  
4 45 measurement (n=2), we further excluded participants with systolic blood pressure (SBP)  $\geq$   
5  
6 46 250 mmHg or diastolic blood pressure (DBP)  $\geq$ 150 mmHg to minimize the potential bias due  
7  
8  
9 47 to measurement errors in blood pressure values (n=73). Finally, we included 883,827  
10  
11  
12 48 participants in the study sample.

13  
14 49

## 17 50 **Data collection and variable definitions**

18  
19 51 Data collection for each participant was performed by trained personnel with a standardized  
20  
21  
22 52 in-person interview and a medical examination. Information on sociodemographic status  
23  
24  
25 53 (age, gender, and education level), lifestyle (smoking and alcohol use), medical history, and  
26  
27 54 medication use were collected. Medication use was determined by asking participants  
28  
29  
30 55 whether they had taken prescribed medications for controlling blood pressure or glucose in  
31  
32  
33 56 the past 2 weeks. Those who answered "yes" and knew the drug names were asked to  
34  
35 57 report the name, dose, and frequency of each drug. Those who did not remember the exact  
36  
37  
38 58 dose stated the number of pills or tablets taken (**Supplement 1**).

39  
40 59

41  
42  
43 60 The blood pressure of each participant was measured twice on the right upper arm after 5  
44  
45 61 minutes of rest in a seated position with a standardized electronic blood pressure monitor  
46  
47  
48 62 (Omron HEM-7430). If the difference between the two SBP readings was greater than 10  
49  
50  
51 63 mmHg, a third measurement was obtained, and the average of the last 2 readings was used.  
52  
53 64 Hypertension was defined as SBP of 140 mmHg or higher, DBP of 90 mmHg or higher, or  
54  
55  
56 65 use of antihypertensive medications, which is consistent with the US Joint National  
57  
58  
59 66 Committee and Chinese definitions<sup>15, 16</sup>. Body mass index (BMI) was defined as weight in

1  
2  
3  
4 67 kilograms divided by height in square meters. Obesity was defined as 28.0 kg/m<sup>2</sup> or higher,  
5  
6 68 based on recommendations from the Working Group on Obesity in China.<sup>17</sup>  
7  
8

9 69

## 10 11 70 **Exposure Assessment**

12  
13  
14 71 We geocoded each participant's current address (either rural counties or urban districts) into  
15  
16  
17 72 latitude and longitude data and identified air monitors located within 10 kilometers  
18  
19 73 (**Supplement 2**). The average distance between the address of participants and assigned  
20  
21  
22 74 monitors was 2.7 (interquartile range 1.2, 3.5) kilometers. The measurements from these  
23  
24  
25 75 monitors strictly followed the methodological standards set by the State Environmental  
26  
27 76 Protection Administration of China. For each participant, daily average PM<sub>2.5</sub> concentrations  
28  
29  
30 77 measured at the nearest monitors to the residence were used to estimate PM<sub>2.5</sub> exposure.  
31  
32  
33 78 The 1-year average concentration before the medical examination was calculated and  
34  
35 79 treated as an indicator of long-term exposure to PM<sub>2.5</sub>. In the present study, we included  
36  
37  
38 80 participants with more than 330 valid PM<sub>2.5</sub> values for assessing long-term exposure, to  
39  
40  
41 81 ensure that, for each participant, the missing rate of PM<sub>2.5</sub> data in the preceding one year of  
42  
43 82 medical examination is less than 10%.<sup>18</sup>  
44  
45

46 83

## 47 48 84 **Statistical Analysis**

49  
50 85 Continuous variables were reported as means with standard deviation; categorical variables  
51  
52  
53 86 were presented as percentages. We developed mixed models with a logit link function to  
54  
55  
56 87 assess the effect of long-term exposure to PM<sub>2.5</sub> on hypertension prevalence. To assess the  
57  
58  
59 88 association of PM<sub>2.5</sub> and blood pressure, SBP and DBP were modeled using linear  
60

1  
2  
3  
4 89 regressions with township-specific random intercepts. For each of these analyses, we  
5  
6 90 started with a model (Model 1) which only included age and sex. We then incrementally  
7  
8  
9 91 adjusted for additional covariates. The second model (Model 2) included Model1 and  
10  
11 92 socioeconomic factors (education level and urbanity). The third model (Model 3) included  
12  
13  
14 93 Model 2 and cardiovascular disease risk factors (BMI, smoking status, alcohol consumption,  
15  
16  
17 94 and diabetes). Models of blood pressure were controlled for hypertensive medication use;  
18  
19 95 while models of hypertension were not, as hypertension medication use was a component of  
20  
21  
22 96 the outcome definition. To account for potential time-variant factors, we additionally adjusted  
23  
24  
25 97 for the day of week (one indicator variable per day) and season of measurement (summer:  
26  
27 98 June–August; fall: September–November; winter: December–February; spring: March–May).  
28  
29  
30 99 We also used restricted cubic splines to characterize the concentration-response (C-R)  
31  
32  
33 100 relationships of PM<sub>2.5</sub> with hypertension prevalence and blood pressure.<sup>19</sup> In addition, to  
34  
35 101 examine effect modification by age, gender, smoking status, alcohol consumption, diabetes,  
36  
37  
38 102 and obesity, each potential modifier was tested by adding an interaction term in the  
39  
40  
41 103 regression model separately and testing its statistical significance as well as the association  
42  
43 104 per categories of the tested variable through subgroup analyses.  
44  
45  
46 105  
47  
48 106 Analyses were conducted with SAS version 9.4, 64-bit Windows (SAS Institute Inc., Cary,  
49  
50  
51 107 North Carolina). All tests of significance were 2-tailed, with a level of significance set at an  
52  
53 108 alpha of 0.05.  
54  
55  
56 109

## 110 **Patient and public involvement**

111 Patients and/or the public were not involved in the design, or conduct, or reporting, or  
112 dissemination plans of this research.

## 114 **RESULT**

### 115 **Study population and baseline characteristics**

116 We included a total of 883,827 participants distributed in 83 county-level regions of mainland  
117 China (**Supplement 3**). The mean age was 55.5 years, 60.4% were women, 43.1% had  
118 hypertension, mean SBP was 143.5 mmHg, mean DBP was 83.1 mmHg, and 19.4% were  
119 taking antihypertensive medications. The 1-year PM<sub>2.5</sub> exposure of the total study population  
120 ranged from 8.8 to 93.8 µg/m<sup>3</sup> (mean 49.2 µg/m<sup>3</sup>). There were 864,119 (97.8%), 842,356  
121 (95.3%), and 706,415 (79.9%) participants with 1-year PM<sub>2.5</sub> exposure higher than 15 µg/m<sup>3</sup>  
122 [World Health Organization (WHO) Interim Target 3 (IT-1)], 25 µg/m<sup>3</sup> [WHO Interim Target 2  
123 (IT-2)], and 35 µg/m<sup>3</sup> [WHO Interim Target 3 (IT-3)], respectively. (**Supplement 4**)

### 125 **Associations of long-term PM<sub>2.5</sub> exposure with hypertension prevalence**

126 After adjusting for sociodemographic characteristics and cardiovascular risk factors, the  
127 odds ratio (OR) of hypertension was 1.09 (95% CI: 1.08–1.10) for each 10 µg/m<sup>3</sup> increase in  
128 PM<sub>2.5</sub>. The adjustment for day of week and season of blood pressure measurements  
129 resulted in a slight decrease in the effect estimate of the association of PM<sub>2.5</sub> exposure with  
130 hypertension prevalence (OR: 1.04, 95%CI: 1.02–1.05). (**Supplement 5**) For the C-R  
131 relationship, the curve showed steeper slopes at high PM<sub>2.5</sub> exposure levels (i.e., higher than

1  
2  
3  
4 132 ~50  $\mu\text{g}/\text{m}^3$ ). Compared to individuals with  $\text{PM}_{2.5}$  exposure of 38.5  $\mu\text{g}/\text{m}^3$ , the adjusted ORs  
5  
6 133 for hypertension of individuals with 15, 25, and 35  $\mu\text{g}/\text{m}^3$  of  $\text{PM}_{2.5}$  exposure were 1.02 (95%  
7  
8  
9 134 CI: 1.01–1.04), 1.01 (95% CI: 1.00–1.02), and 1.00 (95% CI: 1.00–1.00), respectively.  
10

11  
12 135 **(Figure 1)**  
13

14 136  
15

### 17 137 **Associations of long-term $\text{PM}_{2.5}$ exposure with systolic and diastolic blood pressure**

18  
19 138 In the adjusted Model 4, each 10  $\mu\text{g}/\text{m}^3$  increment was associated with increases of 0.50  
20  
21  
22 139 mmHg (95% CI: 0.41–0.59) in SBP and 0.23 mmHg (95% CI: 0.18–0.28) in DBP. After  
23  
24 140 adjustment for the day of week and season, there was some reduction in the effect  
25  
26  
27 141 estimates of the associations between  $\text{PM}_{2.5}$  exposure and blood pressure [0.19 mmHg  
28  
29 142 (95% CI: 0.10–0.28) in SBP; 0.13 mmHg (95% CI: 0.08–0.18) in DBP]. **(Supplement 6)** In  
30  
31 143 addition, we found that the shapes of the C-R curves for SBP and DBP were different. The  
32  
33  
34 144 fitted C-R functions showed upward trends with greater effect estimates of  $\text{PM}_{2.5}$  at higher  
35  
36  
37 145 concentrations for SBP but were generally U-shaped for DBP. **(Figure 2)**  
38  
39

40 146  
41

### 43 147 **Subpopulation difference and effect modification**

44  
45 148 The associations of  $\text{PM}_{2.5}$  exposure with hypertension were stronger among men and non-  
46  
47  
48 149 current smokers, compared with their counterparts **(Figure 3)**. Gender significantly modified  
49  
50 150 the effects of  $\text{PM}_{2.5}$  exposure on all three outcomes (all p for interaction <0.05) with stronger  
51  
52  
53 151 associations among men [e.g., OR for hypertension per 10  $\mu\text{g}/\text{m}^3$  increase in  $\text{PM}_{2.5}$  of 1.01  
54  
55 152 (95% CI: 1.00–1.03) for women, and 1.06 (95% CI: 1.05–1.08) for men]; while these  
56  
57  
58 153 associations were not modified by alcohol consumption and prevalence of diabetes (all p for  
59  
60



1  
2  
3  
4 154 interaction >0.05). Although smoking status was the effect modifiers in the associations of  
5  
6  
7 155 PM<sub>2.5</sub> exposure with SBP, DBP, and hypertension, the impacts of smoking on these  
8  
9 156 associations differed depending on the outcome. We observed greater effect estimates of  
10  
11  
12 157 PM<sub>2.5</sub> exposure for SBP [elevation in SBP per 10 µg/m<sup>3</sup> increase in PM<sub>2.5</sub> of 0.97 mmHg  
13  
14 158 (95% CI: 0.77–1.17) for the elderly, and -0.02 mmHg (95% CI: -0.12–0.08) for their younger  
15  
16  
17 159 counterparts ], while smaller estimates for DBP among the elderly [elevation in DBP per 10  
18  
19 160 µg/m<sup>3</sup> increase in PM<sub>2.5</sub> of 0.11 mmHg (95% CI: 0.00–0.22) for the elderly, and 0.14 mmHg  
20  
21  
22 161 (95% CI: 0.08–0.20) for their younger counterparts]. Besides, obesity was also found to be  
23  
24  
25 162 an effect modifier in the associations of PM<sub>2.5</sub> exposure with SBP and DBP, with greater  
26  
27 163 effect estimates in obese participants. **(Figure 4)**  
28  
29  
30 164

## 31 32 165 **DISCUSSION**

33  
34  
35 166 In this study, we investigated the associations between long-term exposure to PM<sub>2.5</sub> and  
36  
37  
38 167 hypertension prevalence, SBP, and DBP. We found that PM<sub>2.5</sub> was associated with  
39  
40  
41 168 increased risk of hypertension prevalence and elevation of blood pressure. Nonlinearity in  
42  
43 169 these associations was also observed. The C-R curves for hypertension and SBP showed  
44  
45 170 steeper slopes for PM<sub>2.5</sub> concentration above 50 µg/m<sup>3</sup>; while the C-R curve for PM<sub>2.5</sub>–DBP  
46  
47  
48 171 was U-shaped, with the turning point around 50 µg/m<sup>3</sup>. The elderly, men, non-current  
49  
50  
51 172 smokers, and obese participants appeared to be more susceptible to the exposure of PM<sub>2.5</sub>.  
52  
53 173  
54  
55  
56 174 Our study contributes to the existing scientific literature in several ways. First, by including  
57  
58  
59 175 participants in a national cross-sectional survey with long-term exposure to PM<sub>2.5</sub> ranged  
60

1  
2  
3  
4 176 from 8.8–93.8  $\mu\text{g}/\text{m}^3$ , we are able to comprehensively assess the association of  $\text{PM}_{2.5}$   
5  
6 177 exposure with hypertension prevalence and blood pressure among a more diverse spectrum  
7  
8  
9 178 of population with a wider range of  $\text{PM}_{2.5}$  concentrations. We found exposure to  $\text{PM}_{2.5}$  was  
10  
11 179 positively associated with hypertension prevalence and blood pressure. This echoed the  
12  
13  
14 180 data showing that there was an absolute increase of 139 million individuals with  
15  
16  
17 181 hypertension in China during a decade from 2002 to 2013/14<sup>20</sup>, with the national annual  
18  
19 182 mean  $\text{PM}_{2.5}$  increasing from 39.5  $\mu\text{g}/\text{m}^3$  to 47  $\mu\text{g}/\text{m}^3$  between 2000 and 2013.<sup>21</sup> Specifically,  
20  
21  
22 183 in some high-polluted areas such as Beijing-Tianjin-Hebei region of 2013, the annual  
23  
24 184 average concentrations of  $\text{PM}_{2.5}$  had reached 98.9  $\mu\text{g}/\text{m}^3$ , and daily average concentrations  
25  
26 185 had exceeded 300  $\mu\text{g}/\text{m}^3$ .<sup>22, 23</sup> Furthermore, the magnitude of the effects for each 10  $\mu\text{g}/\text{m}^3$   
27  
28  
29 186 increment in  $\text{PM}_{2.5}$  was also similar compared to other studies.<sup>5, 7, 24-26</sup> For example, one  
30  
31 187 study found that each 10  $\mu\text{g}/\text{m}^3$  in  $\text{PM}_{2.5}$  was associated with increases of 0.45 mmHg and  
32  
33 188 0.07 mmHg in SBP and DBP, respectively.<sup>24</sup> And odds ratios for hypertension prevalence  
34  
35 189 related to a 10  $\mu\text{g}/\text{m}^3$  increase in  $\text{PM}_{2.5}$  were ranged from 1.01 to 1.14 in prior studies.<sup>5, 25, 26</sup>  
36  
37  
38 190 It is also noteworthy that others have reported no or inconsistent associations.<sup>27, 28</sup> Adar et  
39  
40 191 al. found no associations between exposures to  $\text{PM}_{2.5}$  and blood pressure based on a  
41  
42  
43 192 longitudinal cohort.<sup>27</sup> However, this study only included a small fraction of Chinese  
44  
45  
46 193 populations (10%), and was conducted in the U.S. with a mean annual average  $\text{PM}_{2.5}$  of 17  
47  
48 194  $\mu\text{g}/\text{m}^3$ , which was lower than the present study (49.2  $\mu\text{g}/\text{m}^3$ ).

195

196 Second, we provided new information on the C-R relationship between long-term  $\text{PM}_{2.5}$

197 exposure and hypertension prevalence. Previous research reported a U-shaped relationship

1  
2  
3  
4 198 with a threshold  $PM_{2.5}$  of  $47.9 \mu\text{g}/\text{m}^3$ .<sup>5</sup> However, in our study, the risk of hypertension  
5  
6 199 associated with  $PM_{2.5}$  became even more pronounced when the exposure was extended to  
7  
8  
9 200 higher levels. This finding was in line with a prior study based on prospective cohorts  
10  
11 201 showed that there was a stepwise increase in the risk of developing hypertension  
12  
13  
14 202 with increasing quartiles of long-term  $PM_{2.5}$  exposure.<sup>29</sup> This result suggests that, for a given  
15  
16  
17 203 decrease in the concentration of  $PM_{2.5}$ , a greater reduction in excess hypertension  
18  
19 204 prevalence would be obtained in highly polluted regions compared with regions with low to  
20  
21  
22 205 moderate levels of  $PM_{2.5}$  exposure. In this respect, the implication of air quality  
23  
24  
25 206 improvements in highly polluted regions of China in recent years would be more profound. It  
26  
27 207 has shown that from 2013 to 2018, the annual average concentration of  $PM_{2.5}$  in Beijing-  
28  
29  
30 208 Tianjin-Hebei region has declined by 49%.<sup>30</sup> Considering the population size and baseline  
31  
32  
33 209  $PM_{2.5}$  levels in these areas, the public health impact related to  $PM_{2.5}$  reduction would be  
34  
35 210 huge.

36  
37 211  
38  
39  
40 212 Third, we found evidence of nonlinearity in the relationships of  $PM_{2.5}$  exposure with SBP and  
41  
42  
43 213 DBP. Interestingly, the shape of curves for SBP and DBP were different. Although the  
44  
45  
46 214 relevant mechanism remains unclear, pathophysiological changes, such as systemic  
47  
48 215 inflammation, atherosclerosis, endothelial dysfunction, and increased arterial stiffness,<sup>4</sup> may  
49  
50  
51 216 have contributed to the observed patterns. The increased arterial stiffness induced by  $PM_{2.5}$   
52  
53  
54 217 would initially lead to elevation in SBP and decline in DBP, creating an increased pulse  
55  
56 218 pressure.<sup>31</sup> While with further increase of arterial stiffness, the heart rates got higher to  
57  
58  
59 219 maintain the stroke volume, which could result in the rise of DBP afterward. In addition, prior  
60

1  
2  
3  
4 220 studies have reported the effects of PM<sub>2.5</sub> exposure on pulse pressures showing a tendency  
5  
6  
7 221 of rising first and then declining at higher PM<sub>2.5</sub> levels, which partially supports this  
8  
9 222 hypothesis.<sup>24</sup>

10 223

11  
12  
13  
14 224 Fourth, we assessed the subpopulation differences through stratified analyses and identified  
15  
16  
17 225 the susceptible individuals to the exposure of PM<sub>2.5</sub>. We observed the large effect estimates  
18  
19  
20 226 of PM<sub>2.5</sub> on SBP among the elderly. Elderly subjects may commonly represent a higher  
21  
22 227 prevalence of preexisting cardiovascular and respiratory diseases, which may confer  
23  
24  
25 228 susceptibility to PM<sub>2.5</sub>. Also, the results showed that PM<sub>2.5</sub> exposure had larger effects on  
26  
27 229 hypertension in men, and such increased susceptibility may be related to sex-related  
28  
29  
30 230 differences in the deposition localization and rates of air pollutants; specifically, men have  
31  
32  
33 231 larger airways and slightly lower airway reactivity.<sup>32</sup> Further, we found stronger associations  
34  
35 232 of PM<sub>2.5</sub> and blood pressure in obese participants. The greater response observed in obese  
36  
37  
38 233 individuals may be attributed to the higher deposition rate of PM<sub>2.5</sub> exposure. This has been  
39  
40  
41 234 demonstrated in overweight children, where there was an increase in tidal volume and  
42  
43 235 resting minute ventilation.<sup>33</sup> Additionally, smoking status was found to be an effect modifier  
44  
45  
46 236 with smaller effects on hypertension among current smokers. This finding is also supported  
47  
48 237 by prior research.<sup>8, 24</sup> One possible explanation is that smoking and PM<sub>2.5</sub> exposure may  
49  
50  
51 238 share the same pathways in mediating cardiovascular effects and smoking may play a  
52  
53  
54 239 dominant role in smokers. Thus, exposure to PM<sub>2.5</sub> might not exert additional harmful effects  
55  
56 240 via the same pathway.<sup>24</sup> There is also some potential that the greater effect size in non-  
57  
58  
59 241 current smokers could also be connected to some of them being advised to quit smoking

1  
2  
3  
4 242 because of multiple comorbidities.  
5

6 243  
7

8  
9 244 Our study should also be interpreted in the context of several limitations. First, given the  
10  
11 245 nature of the cross-sectional study design, the causal relationship could not be established.

12  
13  
14 246 Additional research is needed to examine these relationships in a prospective manner.

15  
16  
17 247 Second, a selection bias is possible because our analysis was restricted to participants with  
18  
19 248 available PM<sub>2.5</sub> data. Third, while we included a number of potential confounders in the  
20  
21  
22 249 analyses, there might be unmeasured confounders that affected the observed associations.

23  
24  
25 250 In particular, we were unable to control for other confounders such as diet and physical

26  
27 251 activity, because these data were only available in a subset of the China PEACE Million

28  
29  
30 252 Persons Project cohort. Fourth, we used the data from the fixed monitors to estimate the

31  
32 253 exposure of PM<sub>2.5</sub> and did not account for residential proximity to major roads, time-activity

33  
34  
35 254 patterns, and indoor-related characteristics, which would likely result in nondifferential

36  
37 255 measurement errors. However, this approach is commonly used and previous research has

38  
39  
40 256 indicated that PM<sub>2.5</sub> exposure estimated by the nearest monitor was highly correlated with

41  
42  
43 257 other sophisticated approaches<sup>34</sup>. Fifth, other gaseous pollutants, such as NO<sub>x</sub> and ozone,

44  
45 258 temperature, and noise were not included in this study. As a result, we were not able to

46  
47  
48 259 determine whether the observed effects were specifically attributable to PM<sub>2.5</sub> or the

49  
50  
51 260 combined effects of these factors.

52  
53 261

54  
55  
56 262 In conclusion, our study demonstrated that long-term exposure to PM<sub>2.5</sub> was positively

57  
58 263 associated with blood pressure and hypertension prevalence. The effect of PM<sub>2.5</sub> on  
59  
60

1  
2  
3  
4 264 hypertension prevalence was more pronounced at higher PM<sub>2.5</sub> concentrations. Our findings  
5  
6 265 reinforce the need to develop comprehensive strategies for addressing air pollution  
7  
8  
9 266 problems, especially for areas with severe air pollution.  
10  
11  
12 267

## 13 14 268 **ACKNOWLEDGMENTS**

15  
16  
17 269 We thank all study individuals for their participation and appreciate the contributions made  
18  
19 270 by project teams at the National Center for Cardiovascular Diseases in the realms of project  
20  
21  
22 271 design, operations, and data collection.  
23  
24  
25 272

## 26 27 273 **FUNDING SOURCES**

28  
29  
30 274 This project was supported by the National Key Research and Development Program  
31  
32 275 (2016YFE0103800) from the Ministry of Science and Technology of China, the CAMS  
33  
34  
35 276 Innovation Fund for Medical Science (2016-I2M-1-006), the Major Public Health Service  
36  
37  
38 277 Project from the Ministry of Finance and National Health and Family Planning Commission of  
39  
40 278 China and the 111 Project (B16005) from the Ministry of Education of China.  
41  
42  
43 279

## 44 45 280 **DISCLOSURES**

46  
47  
48 281 Dr. Jing Li discloses that she is a recipient of research grants from the government of China,  
49  
50 282 through Fuwai Hospital, for research to improve the management of hypertension and blood  
51  
52  
53 283 lipids, and to improve care quality and patient outcomes of cardiovascular disease; is a  
54  
55  
56 284 recipient of research agreements with Amgen, through National Center for Cardiovascular  
57  
58 285 Diseases (NCCD) and Fuwai Hospital, for a multi-centre trial to assess the efficacy and safety  
59  
60

1  
2  
3  
4 286 of Omecamtiv Mecarbil, and for dyslipidemic patient registration; is a recipient of a research  
5  
6 287 agreement with Sanofi, through Fuwai Hospital, for a multi-centre trial on the effects of  
7  
8  
9 288 sotagliflozin; is a recipient of a research agreement with University of Oxford, through Fuwai  
10  
11 289 Hospital, for a multi-centre trial of empagliflozin; and was a recipient of a research agreement,  
12  
13  
14 290 through NCCD, from AstraZeneca for clinical research methods training. The authors declare  
15  
16  
17 291 no other relevant conflicts of interest.  
18  
19

20 292

### 21 22 293 **CONTRIBUTORS**

23  
24 294 JS and XZ conceived of this article. JS wrote the manuscript with further contributions from  
25  
26  
27 295 XZ, YG, XL, EM, MR, GT, DZ, WZ, JL, and MA. JS and SH completed all the statistical  
28  
29  
30 296 analyses. All authors interpreted data, contributed to critical revisions, and approved the final  
31  
32  
33 297 version of the article.  
34

35 298

### 36 37 38 299 **ETHICS APPROVAL**

39  
40 300 The central ethics committee at the China National Center for Cardiovascular Diseases  
41  
42  
43 301 approved this project (Ethical code 2014-574). All enrolled participants provided written  
44  
45  
46 302 informed consent.  
47

48 303

### 49 50 304 **DATA AVAILABILITY STATEMENT**

51  
52  
53 305 No data is available. The China PEACE Million Persons Project is a major national program,  
54  
55  
56 306 and as the government policy stipulates, it is not permissible for the researchers to make the  
57  
58  
59 307 raw data publicly available at this time. All data generated during this study is included in this  
60

1  
2  
3  
4 308 manuscript and its supplementary information files.  
5

6 309 **REFERENCES**  
7

- 8  
9 310 1. Stanaway JD, Afshin A, Gakidou E, et al. Global, regional, and national comparative risk  
10  
11 311 assessment of 84 behavioural, environmental and occupational, and metabolic risks or  
12  
13 312 clusters of risks for 195 countries and territories, 1990-2017: a systematic analysis for the  
14  
15 313 Global Burden of Disease Study 2017. *Lancet (London, England)*. Nov 10  
16  
17 314 2018;392(10159):1923-1994. doi:10.1016/s0140-6736(18)32225-6  
18  
19 315 2. Mills KT, Bundy JD, Kelly TN, et al. Global Disparities of Hypertension Prevalence and  
20  
21 316 Control. *Circulation*. 2016;134(6):441-450. doi:10.1161/circulationaha.115.018912  
22  
23 317 3. Rajagopalan S, Al-Kindi SG, Brook RD. Air Pollution and Cardiovascular Disease: JACC  
24  
25 318 State-of-the-Art Review. *J Am Coll Cardiol*. Oct 23 2018;72(17):2054-2070.  
26  
27 319 doi:10.1016/j.jacc.2018.07.099  
28  
29 320 4. Carey RM, Muntner P, Bosworth HB, Whelton PK. Prevention and Control of  
30  
31 321 Hypertension: JACC Health Promotion Series. *J Am Coll Cardiol*. Sep 11 2018;72(11):1278-  
32  
33 322 1293. doi:10.1016/j.jacc.2018.07.008  
34  
35 323 5. Xie X, Wang Y, Yang Y, et al. Long-Term Effects of Ambient Particulate Matter (With an  
36  
37 324 Aerodynamic Diameter  $\leq 2.5$   $\mu\text{m}$ ) on Hypertension and Blood Pressure and Attributable  
38  
39 325 Risk Among Reproductive-Age Adults in China. *Journal of the American Heart Association*.  
40  
41 326 Apr 26 2018;7(9)doi:10.1161/jaha.118.008553  
42  
43 327 6. Dong GH, Qian ZM, Xaverius PK, et al. Association between long-term air pollution and  
44  
45 328 increased blood pressure and hypertension in China. *Hypertension (Dallas, Tex : 1979)*. Mar  
46  
47 329 2013;61(3):578-84. doi:10.1161/hypertensionaha.111.00003  
48  
49  
50  
51  
52  
53  
54  
55  
56  
57  
58  
59  
60



- 1  
2  
3  
4 330 7. Liu C, Chen R, Zhao Y, et al. Associations between ambient fine particulate air pollution  
5  
6 331 and hypertension: A nationwide cross-sectional study in China. *The Science of the total*  
7  
8 332 *environment*. Apr 15 2017;584-585:869-874. doi:10.1016/j.scitotenv.2017.01.133  
9  
10  
11 333 8. Fuks KB, Weinmayr G, Foraster M, et al. Arterial blood pressure and long-term exposure  
12  
13 334 to traffic-related air pollution: an analysis in the European Study of Cohorts for Air Pollution  
14  
15 335 Effects (ESCAPE). *Environmental health perspectives*. Sep 2014;122(9):896-905.  
16  
17 336 doi:10.1289/ehp.1307725  
18  
19 337 9. Schwartz J, Alexeeff SE, Mordukhovich I, et al. Association between long-term exposure  
20  
21 338 to traffic particles and blood pressure in the Veterans Administration Normative Aging Study.  
22  
23 339 *Occupational and environmental medicine*. Jun 2012;69(6):422-7. doi:10.1136/oemed-2011-  
24  
25 340 100268  
26  
27 341 10. Chan SH, Van Hee VC, Bergen S, et al. Long-Term Air Pollution Exposure and Blood  
28  
29 342 Pressure in the Sister Study. *Environmental health perspectives*. Oct 2015;123(10):951-8.  
30  
31 343 doi:10.1289/ehp.1408125  
32  
33 344 11. Kearney PM, Whelton M, Reynolds K, Muntner P, Whelton PK, He J. Global burden of  
34  
35 345 hypertension: analysis of worldwide data. *Lancet (London, England)*. Jan 15-21  
36  
37 346 2005;365(9455):217-23. doi:10.1016/s0140-6736(05)17741-1  
38  
39  
40 347 12. Cohen AJ, Brauer M, Burnett R, et al. Estimates and 25-year trends of the global burden  
41  
42 348 of disease attributable to ambient air pollution: an analysis of data from the Global Burden of  
43  
44 349 Diseases Study 2015. *The Lancet*. 2017;389(10082):1907-1918.  
45  
46  
47 350 13. Lu J, Xuan S, Downing NS, et al. Protocol for the China PEACE (Patient-centered  
48  
49 351 Evaluative Assessment of Cardiac Events) Million Persons Project pilot. *BMJ Open*. Jan 4  
50  
51  
52  
53  
54  
55  
56  
57  
58  
59  
60

- 1  
2  
3  
4 352 2016;6(1):e010200. doi:10.1136/bmjopen-2015-010200  
5  
6 353 14. Compilation rules of zoning codes for statistics and urban-rural division codes. Accessed  
7  
8  
9 354 July 1, 2021. [http://www.stats.gov.cn/tjsj/tjbz/200911/t20091125\\_8667.html](http://www.stats.gov.cn/tjsj/tjbz/200911/t20091125_8667.html)  
10  
11 355 15. James PA, Oparil S, Carter BL, et al. 2014 evidence-based guideline for the management  
12  
13  
14 356 of high blood pressure in adults: report from the panel members appointed to the Eighth Joint  
15  
16  
17 357 National Committee (JNC 8). *Jama*. 2014;311(5):507-20.  
18  
19 358 16. Liu LS, Writing Group of Chinese Guidelines for the Management of H. [2010 Chinese  
20  
21  
22 359 guidelines for the management of hypertension]. *Zhonghua xin xue guan bing za zhi*. Jul  
23  
24  
25 360 2011;39(7):579-615.  
26  
27 361 17. Zhou BF. Predictive values of body mass index and waist circumference for risk factors  
28  
29  
30 362 of certain related diseases in Chinese adults--study on optimal cut-off points of body mass  
31  
32  
33 363 index and waist circumference in Chinese adults. *Biomedical and environmental sciences :*  
34  
35 364 *BES*. Mar 2002;15(1):83-96.  
36  
37 365 18. Bennett DA. How can I deal with missing data in my study? *Australian and New Zealand*  
38  
39  
40 366 *journal of public health*. 2001;25(5):464-469.  
41  
42  
43 367 19. Desquilbet L, Mariotti F. Dose-response analyses using restricted cubic spline functions  
44  
45  
46 368 in public health research. *Statistics in medicine*. 2010;29(9):1037-1057.  
47  
48 369 20. Li Y, Yang L, Wang L, et al. Burden of hypertension in China: A nationally representative  
49  
50  
51 370 survey of 174,621 adults. *International journal of cardiology*. Jan 15 2017;227:516-523.  
52  
53 371 doi:10.1016/j.ijcard.2016.10.110  
54  
55  
56 372 21. Liang F, Xiao Q, Huang K, et al. The 17-y spatiotemporal trend of PM<sub>2.5</sub>  
57  
58  
59 373 and its mortality burden in China. *Proceedings of the National Academy of Sciences*.  
60

- 1  
2  
3  
4 374 2020;117(41):25601-25608. doi:10.1073/pnas.1919641117  
5  
6  
7 375 22. Wang L, Xiong Q, Wu G, et al. Spatio-temporal variation characteristics of PM<sub>2.5</sub> in the  
8  
9 376 Beijing–Tianjin–Hebei Region, China, from 2013 to 2018. *Int J Environ Res Public Health*.  
10  
11 377 2019;16(21):4276.  
12  
13  
14 378 23. Batterman S, Xu L, Chen F, Chen F, Zhong X. Characteristics of PM(2.5) Concentrations  
15  
16 379 across Beijing during 2013-2015. *Atmos Environ (1994)*. Nov 2016;145:104-114.  
17  
18  
19 380 doi:10.1016/j.atmosenv.2016.08.060  
20  
21  
22 381 24. Zhang Z, Guo C, Lau AKH, et al. Long-Term Exposure to Fine Particulate Matter, Blood  
23  
24 382 Pressure, and Incident Hypertension in Taiwanese Adults. *Environmental health perspectives*.  
25  
26  
27 383 Jan 18 2018;126(1):017008. doi:10.1289/ehp2466  
28  
29  
30 384 25. Cai Y, Zhang B, Ke W, et al. Associations of Short-Term and Long-Term Exposure to  
31  
32 385 Ambient Air Pollutants With Hypertension: A Systematic Review and Meta-Analysis.  
33  
34  
35 386 *Hypertension (Dallas, Tex : 1979)*. Jul 2016;68(1):62-70.  
36  
37  
38 387 doi:10.1161/hypertensionaha.116.07218  
39  
40  
41 388 26. Lin H, Guo Y, Zheng Y, et al. Long-Term Effects of Ambient PM<sub>2.5</sub> on Hypertension and  
42  
43 389 Blood Pressure and Attributable Risk Among Older Chinese Adults. *Hypertension (Dallas, Tex*  
44  
45 390 *: 1979)*. 2017;69(5):806-812. doi:10.1161/hypertensionaha.116.08839  
46  
47  
48 391 27. Adar SD, Chen YH, D'Souza JC, et al. Longitudinal Analysis of Long-Term Air Pollution  
49  
50 392 Levels and Blood Pressure: A Cautionary Tale from the Multi-Ethnic Study of Atherosclerosis.  
51  
52  
53 393 *Environmental health perspectives*. Oct 2018;126(10):107003. doi:10.1289/ehp2966  
54  
55  
56 394 28. Chen S-Y, Wu C-F, Lee J-H, et al. Associations between Long-Term Air Pollutant  
57  
58 395 Exposures and Blood Pressure in Elderly Residents of Taipei City: A Cross-Sectional Study.  
59  
60

- 1  
2  
3  
4 396 *Environmental health perspectives*. 2015;123(8):779-784. doi:10.1289/ehp.1408771  
5  
6  
7 397 29. Huang K, Yang X, Liang F, et al. Long-Term Exposure to Fine Particulate Matter and  
8  
9 398 Hypertension Incidence in China. *Hypertension (Dallas, Tex : 1979)*. Jun 2019;73(6):1195-  
10  
11 399 1201. doi:10.1161/hypertensionaha.119.12666  
12  
13  
14 400 30. Zhai S, Jacob DJ, Wang X, et al. Fine particulate matter (PM2.5) trends in China, 2013–  
15  
16 401 2018: separating contributions from anthropogenic emissions and meteorology. *Atmos Chem*  
17  
18 402 *Phys*. 2019;19(16):11031-11041. doi:10.5194/acp-19-11031-2019  
19  
20  
21 403 31. Bavishi C, Goel S, Messerli FH. Isolated systolic hypertension: an update after SPRINT.  
22  
23 404 *The American journal of medicine*. 2016;129(12):1251-1258.  
24  
25  
26 405 32. Yunginger JW, Reed CE, O'Connell EJ, Melton L, O'Fallon WM, Silverstein MD. A  
27  
28 406 community-based study of the epidemiology of asthma. *Am Rev Respir Dis*. 1992;146(4):888-  
29  
30 407 894.  
31  
32  
33 408 33. Bennett WD, Zeman KL. Effect of body size on breathing pattern and fine-particle  
34  
35 409 deposition in children. *Journal of Applied Physiology*. 2004;97(3):821-826.  
36  
37 410 doi:10.1152/jappphysiol.01403.2003  
38  
39  
40 411 34. Miller KA, Spalt EW, Gasset AJ, et al. Estimating ambient-origin PM2.5 exposure for  
41  
42 412 epidemiology: observations, prediction, and validation using personal sampling in the Multi-  
43  
44 413 Ethnic Study of Atherosclerosis. *Journal of exposure science & environmental epidemiology*.  
45  
46 414 2019;29(2):227-237. doi:10.1038/s41370-018-0053-x  
47  
48  
49  
50  
51  
52  
53  
54  
55  
56  
57  
58  
59  
60

1  
2  
3  
4 417 **FIGURE LEGEND**

5  
6 418 **Figure 1.** Concentration-response functions of the long-term exposure to PM<sub>2.5</sub> with  
7 419 hypertension prevalence

8  
9 420 **Figure 2.** Concentration-response functions of the long-term exposure to PM<sub>2.5</sub> with systolic  
10 421 blood pressure (SBP) and diastolic blood pressure (DBP)

11  
12 422 **Figure 3.** Stratified analysis of the association of long-term exposure to PM<sub>2.5</sub> with  
13 423 hypertension prevalence

14  
15 424 **Figure 4.** Stratified analysis of the association of long-term exposure to PM<sub>2.5</sub> with systolic  
16 425 blood pressure (SBP) and diastolic blood pressure (DBP)

17  
18  
19  
20  
21  
22  
23  
24  
25  
26  
27  
28  
29  
30  
31  
32  
33  
34  
35  
36  
37  
38  
39  
40  
41  
42  
43  
44  
45  
46  
47  
48  
49  
50  
51  
52  
53  
54  
55  
56  
57  
58  
59  
60

For peer review only

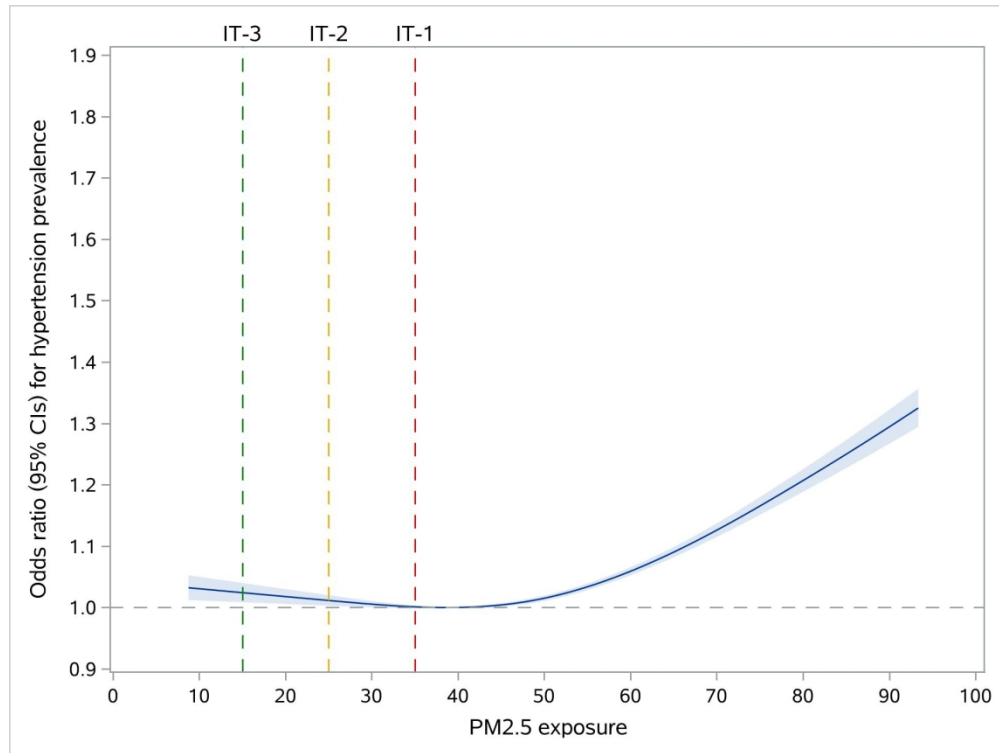

Figure 1. Concentration-response functions of the long-term exposure to PM<sub>2.5</sub> with hypertension prevalence. Effect estimates were presented as adjusted odds ratios for hypertension prevalence compared to individuals with PM<sub>2.5</sub> exposure 38.5 µg/m<sup>3</sup>. The dashed lines represent the air-quality standards for annual average concentrations of PM<sub>2.5</sub> according to the World Health Organization (WHO) Interim Target 1 (IT-1), WHO Interim Target 2 (IT-2), WHO Interim Target 3 (IT-3). Covariates of the model including age, sex, education level, urbanity, smoking status, alcohol consumption, obesity, diabetes, as well as the day of week and season of blood pressure measurement.

169x127mm (300 x 300 DPI)

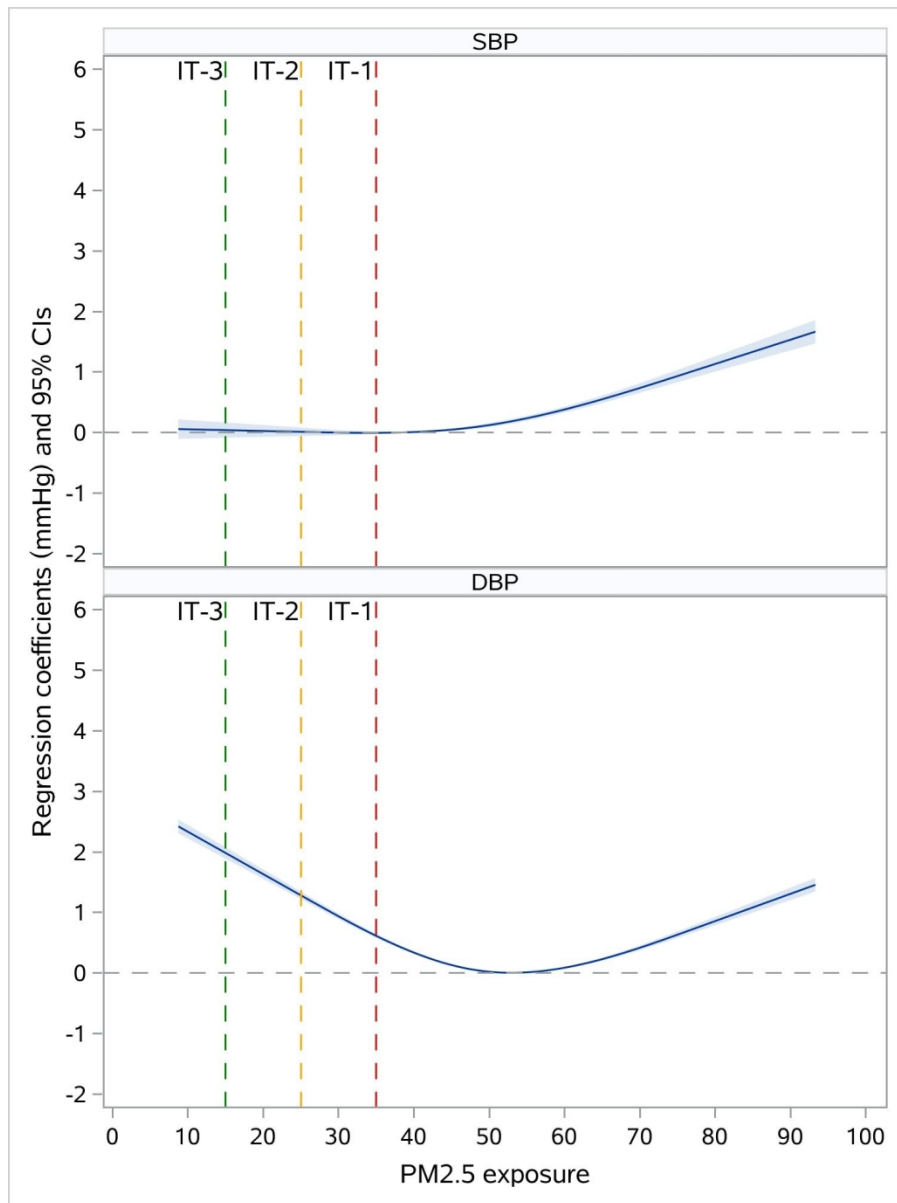

Figure 2. Concentration-response functions of the long-term exposure to  $PM_{2.5}$  with systolic blood pressure (SBP) and diastolic blood pressure (DBP). Effect estimates (regression coefficients) were presented as changes in SBP compared to individuals with  $PM_{2.5}$  exposure  $39 \mu g/m^3$  and changes in DBP compared to individuals with  $PM_{2.5}$  exposure  $53 \mu g/m^3$ . The dashed lines represent the air-quality standards for annual average concentrations of  $PM_{2.5}$  according to the World Health Organization (WHO) Interim Target 1 (IT-1), WHO Interim Target 2 (IT-2), WHO Interim Target 3 (IT-3). Covariates of the model including age, sex, education level, urbanity, smoking status, alcohol consumption, obesity, diabetes, and use of antihypertensive medications, as well as the day of week and season of blood pressure measurement.

127x169mm (300 x 300 DPI)

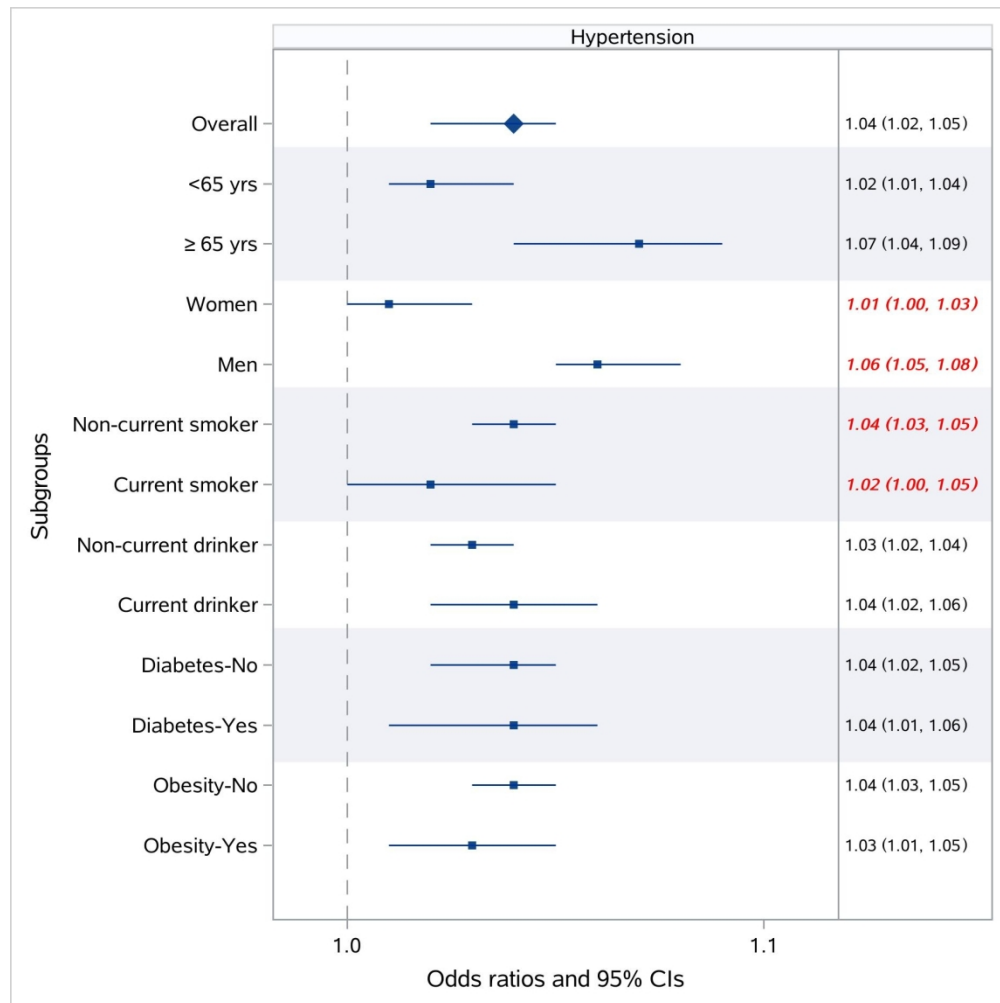

Figure 3. Stratified analysis of the association of long-term exposure to  $PM_{2.5}$  with hypertension prevalence. Red texts with italics indicated that p-value for interaction terms  $< 0.05$ . Effect estimates (regression coefficients) were presented as adjusted odds ratios for hypertension prevalence for each  $10 \mu g/m^3$  increment in the 1-year  $PM_{2.5}$  exposure. Covariates of the model including age, sex, education level, urbanity, smoking status, alcohol consumption, obesity, diabetes, as well as the day of week and season of blood pressure measurement.

158x158mm (300 x 300 DPI)



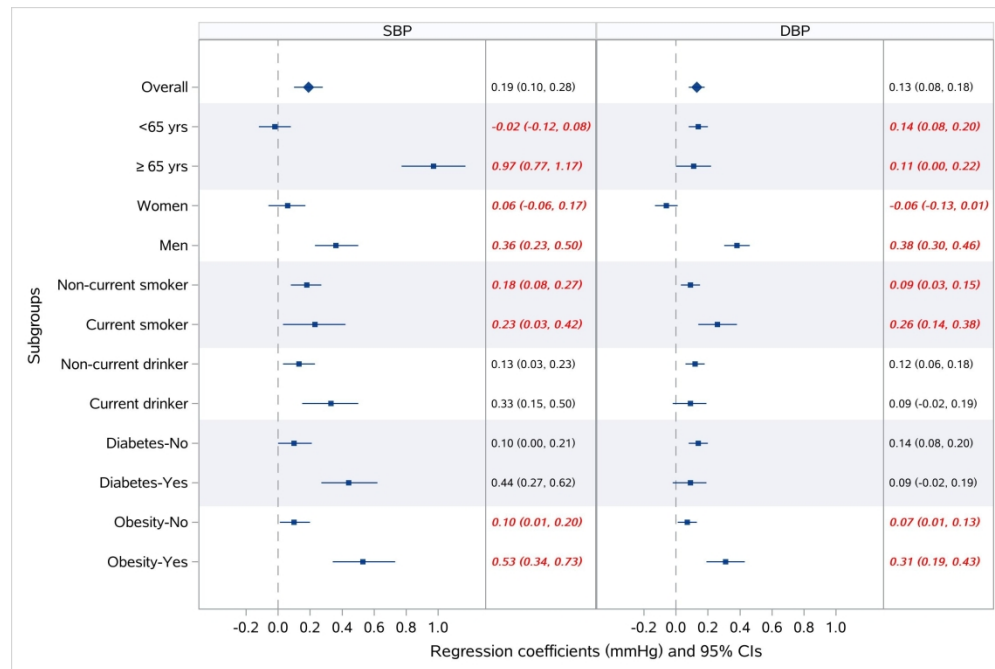

Figure 4. Stratified analysis of the association of long-term exposure to  $PM_{2.5}$  with blood pressure. Red texts with italics indicated that p-value for interaction terms  $< 0.05$ . Effect estimates (regression coefficients) were presented as changes in systolic blood pressure (SBP) or diastolic blood pressure (DBP) for each  $10 \mu g/m^3$  increment in the 1-year  $PM_{2.5}$  exposure deriving from multivariable linear regression. Covariates of the model including age, sex, education level, urbanity, smoking status, alcohol consumption, obesity, diabetes, and use of antihypertensive medications, as well as the day of week and season of blood pressure measurement.

238x158mm (300 x 300 DPI)

1  
2  
3  
4 **1 SUPPLEMENTAL MATERIAL**

5  
6 **2 Supplement 1. Collection of medication data in China PEACE Million Persons Project.**

7  
8 3 Potential participants who were taking medications were required to bring their drug  
9 4 packaging (boxes) to the project sites. During the face-to-face interview, local project staff  
10 5 asked participants whether they always took anti-hypertension, lipid-lowering, anti-diabetics,  
11 6 or anti-platelet drugs during the past 2 weeks. Those who answered “yes” and knew the  
12 7 name of the drug were further asked to report the name, dose, and frequency of each drug.  
13 8 For those who did not remember the exact dose of the drug, the number of tablets or pills  
14 9 taken was recorded. Interviewers searched and selected drug names or the first letter of the  
15 10 Chinese phonetic alphabet participants answered by entering the generic name or trade  
16 11 name of each drug in the electronic data collecting system. In this system, a data dictionary  
17 12 was used to confirm drug information, including the drug class, generic name, trade name,  
18 13 and corresponding unique ID.  
19  
20  
21  
22  
23  
24  
25  
26  
27  
28  
29  
30  
31  
32  
33  
34  
35  
36  
37  
38  
39  
40  
41  
42  
43  
44  
45  
46  
47  
48  
49  
50  
51  
52  
53  
54  
55  
56  
57  
58  
59  
60

15 **Supplement 2. Summary statistics for daily PM<sub>2.5</sub> (µg/m<sup>3</sup>) concentrations of assigned**  
 16 **monitors in 83 study regions.**

| No. | Mean  | Median | 25 <sup>th</sup><br>percentile | 75 <sup>th</sup><br>percentile | Minimum | Maximum | Total<br>(days) | Missing<br>(days) |
|-----|-------|--------|--------------------------------|--------------------------------|---------|---------|-----------------|-------------------|
| 1   | 67.9  | 50     | 26                             | 88                             | 5       | 540     | 1461            | 22                |
| 2   | 65.48 | 48     | 23                             | 85                             | 3       | 515     | 1461            | 25                |
| 3   | 56.39 | 40     | 19                             | 76                             | 2       | 448     | 1461            | 18                |
| 4   | 69.26 | 50     | 27                             | 88                             | 4       | 529     | 1461            | 10                |
| 5   | 57.73 | 41     | 20                             | 77                             | 4       | 446     | 1461            | 9                 |
| 6   | 64.46 | 51     | 32                             | 79.5                           | 6       | 350     | 1461            | 13                |
| 7   | 62.85 | 50     | 30                             | 78                             | 4       | 409     | 1461            | 38                |
| 8   | 68.35 | 54     | 34                             | 83.5                           | 7       | 408     | 1461            | 37                |
| 9   | 64.46 | 51     | 32                             | 79.5                           | 6       | 350     | 1461            | 13                |
| 10  | 65.52 | 51     | 32                             | 81                             | 7       | 410     | 1461            | 34                |
| 11  | 86.31 | 61     | 38                             | 107                            | 5       | 708     | 1461            | 37                |
| 12  | 63.99 | 52     | 37                             | 76                             | 6       | 421     | 1461            | 18                |
| 13  | 61.01 | 50     | 30                             | 79                             | 2       | 290     | 1461            | 24                |
| 14  | 60.51 | 49     | 32                             | 76                             | 7       | 390     | 1461            | 70                |
| 15  | 46.19 | 40     | 29                             | 55                             | 7       | 276     | 1461            | 44                |
| 16  | 22.9  | 18     | 12                             | 29                             | 3       | 187     | 1461            | 59                |
| 17  | 54.55 | 41     | 26                             | 68                             | 3       | 932     | 1461            | 14                |
| 18  | 40.93 | 32     | 20                             | 50                             | 5       | 450     | 1461            | 16                |
| 19  | 44.97 | 35     | 22                             | 56                             | 6       | 353     | 1461            | 39                |
| 20  | 48.8  | 37     | 24                             | 59                             | 6       | 508     | 1461            | 15                |
| 21  | 45.3  | 31     | 19                             | 55                             | 3       | 612     | 1461            | 27                |
| 22  | 30.54 | 22     | 14                             | 39                             | 2       | 308     | 1461            | 17                |
| 23  | 45.36 | 34     | 21                             | 58                             | 3       | 378     | 1461            | 24                |
| 24  | 54.24 | 33     | 21                             | 66                             | 5       | 730     | 1461            | 24                |
| 25  | 39.52 | 29     | 18                             | 49                             | 3       | 502     | 1461            | 78                |
| 26  | 42.91 | 36     | 22                             | 55                             | 4       | 235     | 1461            | 24                |
| 27  | 44.22 | 36     | 22                             | 58                             | 5       | 225     | 1461            | 60                |
| 28  | 44.97 | 38     | 24                             | 58                             | 5       | 218     | 1461            | 22                |
| 29  | 44.32 | 37     | 23                             | 57                             | 6       | 224     | 1461            | 12                |
| 30* | 49.23 | 40     | 28                             | 62                             | 10      | 271     | 797             | 1                 |
| 31  | 52.7  | 42     | 27                             | 67                             | 7       | 284     | 1461            | 9                 |
| 32  | 51.19 | 43     | 28                             | 64                             | 3       | 250     | 1461            | 40                |
| 33  | 49.98 | 44     | 31                             | 61                             | 6       | 259     | 1461            | 26                |
| 34  | 47.59 | 40     | 27                             | 59                             | 3       | 233     | 1461            | 30                |
| 35  | 27.35 | 25     | 17                             | 35                             | 2       | 114     | 1461            | 46                |
| 36  | 26.16 | 22     | 14                             | 34                             | 2       | 233     | 1461            | 5                 |
| 37* | 32.18 | 25     | 14                             | 45                             | 4       | 155     | 650             | 15                |
| 38  | 45.33 | 40     | 29                             | 57                             | 9       | 209     | 1461            | 32                |
| 39  | 49.12 | 44     | 31                             | 62                             | 3       | 356     | 1461            | 27                |
| 40  | 74.08 | 60     | 40                             | 92                             | 7       | 431     | 1461            | 22                |
| 41  | 56.81 | 46     | 31                             | 70                             | 7       | 327     | 1461            | 44                |
| 42* | 70.49 | 57     | 40                             | 82                             | 6       | 514     | 797             | 56                |
| 43* | 56.69 | 46     | 34                             | 65                             | 14      | 257     | 606             | 15                |
| 44  | 69.96 | 53     | 35                             | 88                             | 5       | 548     | 1461            | 57                |
| 45  | 62    | 50     | 31                             | 81                             | 3       | 275     | 1461            | 20                |
| 46  | 44.01 | 38     | 26                             | 56                             | 5       | 195     | 1461            | 31                |
| 47  | 48.13 | 43     | 29                             | 61                             | 6       | 478     | 1461            | 43                |
| 48  | 51.57 | 43     | 29                             | 65                             | 5       | 289     | 1461            | 10                |
| 49  | 39.33 | 33     | 23                             | 50                             | 6       | 214     | 1461            | 12                |
| 50  | 32.84 | 29     | 20                             | 42                             | 5       | 121     | 1461            | 22                |

|    |     |       |      |    |    |    |     |      |     |
|----|-----|-------|------|----|----|----|-----|------|-----|
| 1  |     |       |      |    |    |    |     |      |     |
| 2  |     |       |      |    |    |    |     |      |     |
| 3  | 51  | 32.48 | 28   | 18 | 43 | 5  | 149 | 1461 | 35  |
| 4  | 52  | 27.19 | 24   | 14 | 36 | 3  | 120 | 1461 | 31  |
| 5  | 53  | 38.01 | 33   | 21 | 49 | 5  | 192 | 1461 | 16  |
| 6  | 54  | 35.67 | 30   | 19 | 46 | 3  | 269 | 1461 | 13  |
| 7  | 55  | 50.36 | 42   | 27 | 64 | 6  | 286 | 1461 | 23  |
| 8  | 56  | 44.34 | 35   | 23 | 56 | 5  | 333 | 1461 | 6   |
| 9  | 57  | 35.14 | 29   | 16 | 47 | 3  | 202 | 1461 | 22  |
| 10 | 58  | 22.1  | 18   | 14 | 27 | 3  | 123 | 1461 | 31  |
| 11 | 59  | 15.14 | 13   | 9  | 18 | 2  | 68  | 1461 | 12  |
| 12 | 60* | 37.75 | 29   | 18 | 47 | 5  | 183 | 773  | 20  |
| 13 | 61  | 49.89 | 41   | 30 | 61 | 8  | 222 | 1461 | 27  |
| 14 | 62  | 60.72 | 49   | 32 | 77 | 5  | 353 | 1461 | 8   |
| 15 | 63  | 42.87 | 36   | 24 | 55 | 5  | 215 | 1461 | 16  |
| 16 | 64  | 49.35 | 40   | 24 | 65 | 3  | 235 | 1461 | 13  |
| 17 | 65  | 32.64 | 28   | 18 | 42 | 4  | 195 | 1461 | 23  |
| 18 | 66  | 30.96 | 28   | 21 | 39 | 7  | 123 | 1461 | 10  |
| 19 | 67  | 29.79 | 28   | 20 | 36 | 7  | 102 | 1461 | 23  |
| 20 | 68  | 13.86 | 14   | 12 | 15 | 3  | 51  | 1461 | 109 |
| 21 | 69  | 25.99 | 19   | 13 | 32 | 5  | 187 | 1461 | 33  |
| 22 | 70  | 24.49 | 19   | 13 | 30 | 2  | 124 | 1461 | 156 |
| 23 | 71  | 11.95 | 10   | 7  | 15 | 2  | 88  | 1461 | 87  |
| 24 | 72  | 51.21 | 42   | 30 | 63 | 10 | 239 | 1461 | 238 |
| 25 | 73  | 10.62 | 9    | 7  | 13 | 4  | 73  | 1461 | 46  |
| 26 | 74  | 53.8  | 41.5 | 28 | 64 | 5  | 328 | 1461 | 19  |
| 27 | 75  | 38.88 | 32   | 23 | 47 | 4  | 169 | 1461 | 27  |
| 28 | 76  | 44.45 | 36   | 24 | 57 | 4  | 581 | 1461 | 59  |
| 29 | 77  | 44.1  | 36   | 25 | 53 | 5  | 287 | 1461 | 44  |
| 30 | 78* | 44.04 | 38   | 27 | 56 | 9  | 139 | 488  | 27  |
| 31 | 79  | 55.15 | 45   | 30 | 68 | 5  | 363 | 1461 | 14  |
| 32 | 80  | 44.69 | 36   | 24 | 55 | 5  | 219 | 1461 | 50  |
| 33 | 81  | 65.37 | 34   | 20 | 85 | 5  | 447 | 1461 | 97  |
| 34 | 82  | 57.76 | 29   | 19 | 70 | 3  | 414 | 1461 | 58  |
| 35 | 83  | 51.7  | 26   | 14 | 65 | 3  | 406 | 1461 | 42  |

17 Note:

18 \* Monitors being available after 2015

19 Total: Number of days of assigned monitors being available during 2015-2018

20 Missing: Number of days with missing PM<sub>2.5</sub> concentration during 2015-2018

21

1  
2  
3  
4  
5  
6  
7  
8  
9  
10  
11  
12  
13  
14  
15  
16  
17  
18  
19  
20  
21  
22  
23  
24  
25  
26  
27  
28  
29  
30  
31  
32  
33  
34  
35  
36  
37  
38  
39  
40  
41  
42  
43  
44  
45  
46  
47  
48  
49  
50  
51  
52  
53  
54  
55  
56  
57  
58  
59  
60

**22 Supplement 3. Distribution of study sites in China Patient-Centered Evaluative**  
**23 Assessment of Cardiac Events Million Persons Project.**

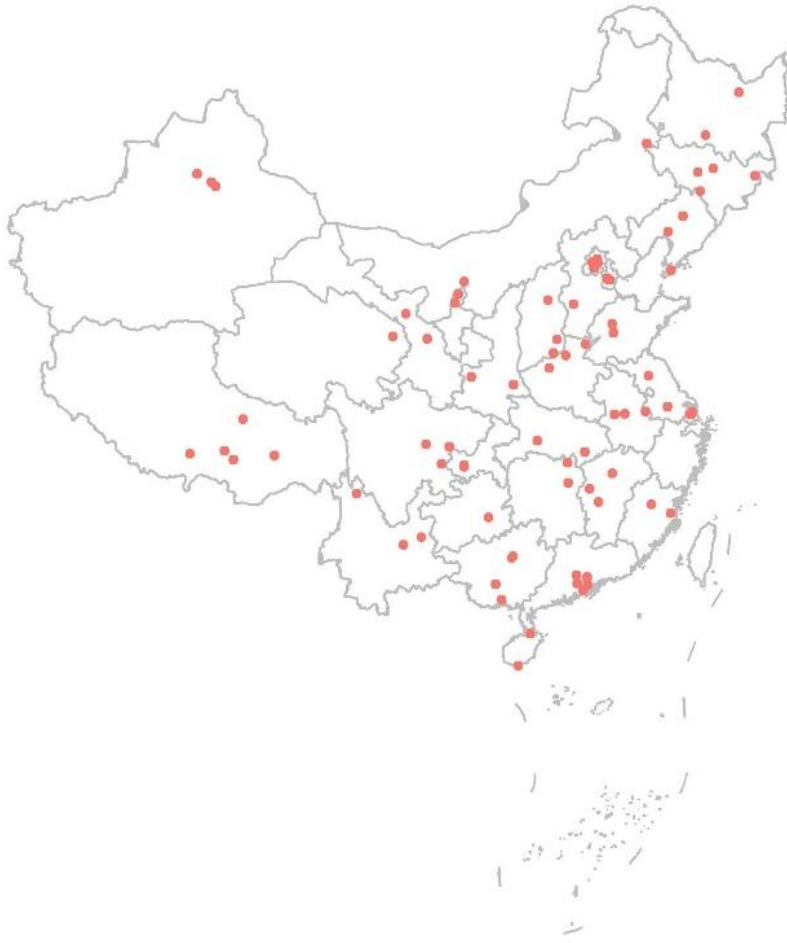

24  
25

only

26 **Supplement 4. Characteristics of the study population.**

| Variable                                                        | Total<br>(n=883,827) |
|-----------------------------------------------------------------|----------------------|
| <b>Socio-demographics</b>                                       |                      |
| Age, mean (SD), years                                           | 55.5 (10.1)          |
| Female, n (%)                                                   | 533897 (60.4)        |
| Urban residence, n (%)                                          | 657608 (74.4)        |
| Han ethnic group, n (%)                                         | 805479 (91.1)        |
| College or above                                                | 102764 (11.6)        |
| <b>Regions, n (%)</b>                                           |                      |
| Eastern                                                         | 325253 (36.8)        |
| Central                                                         | 178435 (20.2)        |
| Western                                                         | 311599 (35.3)        |
| Northeastern                                                    | 68540 (7.8)          |
| <b>Cardiovascular risk factors, n (%)</b>                       |                      |
| Obesity                                                         | 142150 (16.1)        |
| Current drinker                                                 | 194967 (22.1)        |
| Diabetes                                                        | 173950 (19.7)        |
| Current smoker                                                  | 161006 (18.2)        |
| Hypertension                                                    | 381223 (43.1)        |
| <b>Blood pressures</b>                                          |                      |
| Systolic blood pressure, mean (SD)                              | 143.5 (22.2)         |
| Diastolic blood pressure, mean (SD)                             | 83.1 (12.3)          |
| <b>PM<sub>2.5</sub> exposures</b>                               |                      |
| 1-y average PM <sub>2.5</sub> exposure, mean (SD)               | 49.2 (16.4)          |
| Above WHO Interim Target 1 (IT-1, 35 µg/m <sup>3</sup> ), n (%) | 706415 (79.9)        |
| Above WHO Interim Target 2 (IT-2, 25 µg/m <sup>3</sup> ), n (%) | 842356 (95.3)        |
| Above WHO Interim Target 3 (IT-3, 15 µg/m <sup>3</sup> ), n (%) | 864119 (97.8)        |

27

28

29 **Supplement 5. The effect of PM<sub>2.5</sub> exposure on hypertension prevalence.**

| Model                          | Per 10 µg/m <sup>3</sup> PM <sub>2.5</sub> increment |         |
|--------------------------------|------------------------------------------------------|---------|
|                                | Odds ratios (95% confidence intervals)               | p-Value |
| <b>Hypertension prevalence</b> |                                                      |         |
| Model 1                        | 1.10 (1.09–1.11)                                     | <0.001  |
| Model 2                        | 1.10 (1.09–1.11)                                     | <0.001  |
| Model 3                        | 1.09 (1.08–1.10)                                     | <0.001  |
| Model 4                        | 1.09 (1.08–1.10)                                     | <0.001  |
| Model 5                        | 1.04 (1.02–1.05)                                     | <0.001  |
| Model 6                        | 1.04 (1.02–1.05)                                     | <0.001  |

30 Model 1: Included age and sex;

31 Model 2: Model 1 + education level and urbanity;

32 Model 3: Model 2 + smoking status, alcohol consumption, obesity, and diabetes;

33 Model 4: Model 3 + day of week of the medical examination;

34 Model 5: Model 3 + season of the medical examination;

35 Model 6: Model 3 + day of week + season.

36

37 **Supplement 6. The effect of PM<sub>2.5</sub> exposure on blood pressure.**

| Model                           | Per 10 µg/m <sup>3</sup> PM <sub>2.5</sub> increment |         |
|---------------------------------|------------------------------------------------------|---------|
|                                 | mmHg (95% confidence intervals)                      | p-value |
| <b>Systolic blood pressure</b>  |                                                      |         |
| Model 1                         | 0.58 (0.49–0.67)                                     | <0.001  |
| Model 2                         | 0.57 (0.48–0.66)                                     | <0.001  |
| Model 3                         | 0.45 (0.36–0.54)                                     | <0.001  |
| Model 4                         | 0.50 (0.41–0.59)                                     | <0.001  |
| Model 5                         | 0.50 (0.41–0.59)                                     | <0.001  |
| Model 6                         | 0.19 (0.10–0.28)                                     | <0.001  |
| Model 7                         | 0.19 (0.10–0.28)                                     | <0.001  |
| <b>Diastolic blood pressure</b> |                                                      |         |
| Model 1                         | 0.29 (0.23–0.34)                                     | <0.001  |
| Model 2                         | 0.28 (0.23–0.34)                                     | <0.001  |
| Model 3                         | 0.21 (0.15–0.26)                                     | <0.001  |
| Model 4                         | 0.23 (0.18–0.28)                                     | <0.001  |
| Model 5                         | 0.23 (0.18–0.28)                                     | <0.001  |
| Model 6                         | 0.13 (0.08–0.18)                                     | <0.001  |
| Model 7                         | 0.13 (0.08–0.18)                                     | <0.001  |

38 Model 1: Included age and sex;

39 Model 2: Model 1 + education level and urbanity;

40 Model 3: Model 2 + smoking status, alcohol consumption, obesity, and diabetes;

41 Model 4: Model 3 + use of antihypertensive medication;

42 Model 5: Model 4 + day of week of the medical examination;

43 Model 6: Model 3 + season of the medical examination;

44 Model 7: Model 3 + day of week + season.



STROBE Statement—Checklist of items that should be included in reports of *cross-sectional studies*

|                              | Item No | Recommendation                                                                                                                                                                                    | Page No |
|------------------------------|---------|---------------------------------------------------------------------------------------------------------------------------------------------------------------------------------------------------|---------|
| <b>Title and abstract</b>    | 1       | (a) Indicate the study's design with a commonly used term in the title or the abstract                                                                                                            | 3       |
|                              |         | (b) Provide in the abstract an informative and balanced summary of what was done and what was found                                                                                               | 3       |
| <b>Introduction</b>          |         |                                                                                                                                                                                                   |         |
| Background/rationale         | 2       | Explain the scientific background and rationale for the investigation being reported                                                                                                              | 6       |
| Objectives                   | 3       | State specific objectives, including any prespecified hypotheses                                                                                                                                  | 7       |
| <b>Methods</b>               |         |                                                                                                                                                                                                   |         |
| Study design                 | 4       | Present key elements of study design early in the paper                                                                                                                                           | 7       |
| Setting                      | 5       | Describe the setting, locations, and relevant dates, including periods of recruitment, exposure, follow-up, and data collection                                                                   | 7       |
| Participants                 | 6       | (a) Give the eligibility criteria, and the sources and methods of selection of participants                                                                                                       | 7       |
| Variables                    | 7       | Clearly define all outcomes, exposures, predictors, potential confounders, and effect modifiers. Give diagnostic criteria, if applicable                                                          | 8       |
| Data sources/<br>measurement | 8*      | For each variable of interest, give sources of data and details of methods of assessment (measurement). Describe comparability of assessment methods if there is more than one group              | 7-8     |
| Bias                         | 9       | Describe any efforts to address potential sources of bias                                                                                                                                         | 9       |
| Study size                   | 10      | Explain how the study size was arrived at                                                                                                                                                         | 8       |
| Quantitative variables       | 11      | Explain how quantitative variables were handled in the analyses. If applicable, describe which groupings were chosen and why                                                                      | 9       |
| Statistical methods          | 12      | (a) Describe all statistical methods, including those used to control for confounding                                                                                                             | 9-10    |
|                              |         | (b) Describe any methods used to examine subgroups and interactions                                                                                                                               | 10      |
|                              |         | (c) Explain how missing data were addressed                                                                                                                                                       | 8       |
|                              |         | (d) If applicable, describe analytical methods taking account of sampling strategy                                                                                                                | 9-10    |
|                              |         | (e) Describe any sensitivity analyses                                                                                                                                                             | 10      |
| <b>Results</b>               |         |                                                                                                                                                                                                   |         |
| Participants                 | 13*     | (a) Report numbers of individuals at each stage of study—eg numbers potentially eligible, examined for eligibility, confirmed eligible, included in the study, completing follow-up, and analysed | 10      |
|                              |         | (b) Give reasons for non-participation at each stage                                                                                                                                              | 7-8     |
|                              |         | (c) Consider use of a flow diagram                                                                                                                                                                | 7-8     |
| Descriptive data             | 14*     | (a) Give characteristics of study participants (eg demographic, clinical, social) and information on exposures and potential confounders                                                          | 10-11   |
|                              |         | (b) Indicate number of participants with missing data for each variable of interest                                                                                                               | 7-8     |
| Outcome data                 | 15*     | Report numbers of outcome events or summary measures                                                                                                                                              | 10-11   |

|    |                          |    |                                                                                                                                                                                                              |
|----|--------------------------|----|--------------------------------------------------------------------------------------------------------------------------------------------------------------------------------------------------------------|
| 1  |                          |    |                                                                                                                                                                                                              |
| 2  | Main results             | 16 | (a) Give unadjusted estimates and, if applicable, confounder-adjusted estimates and their precision (eg, 95% confidence interval). Make clear which confounders were adjusted for and why they were included |
| 3  |                          |    | 11-12                                                                                                                                                                                                        |
| 4  |                          |    |                                                                                                                                                                                                              |
| 5  |                          |    |                                                                                                                                                                                                              |
| 6  |                          |    | (b) Report category boundaries when continuous variables were categorized                                                                                                                                    |
| 7  |                          |    | 10-11                                                                                                                                                                                                        |
| 8  |                          |    |                                                                                                                                                                                                              |
| 9  |                          |    | (c) If relevant, consider translating estimates of relative risk into absolute risk for a meaningful time period                                                                                             |
| 10 |                          |    | NA                                                                                                                                                                                                           |
| 11 | Other analyses           | 17 | Report other analyses done—eg analyses of subgroups and interactions, and sensitivity analyses                                                                                                               |
| 12 |                          |    | 12                                                                                                                                                                                                           |
| 13 |                          |    |                                                                                                                                                                                                              |
| 14 | <b>Discussion</b>        |    |                                                                                                                                                                                                              |
| 15 | Key results              | 18 | Summarise key results with reference to study objectives                                                                                                                                                     |
| 16 |                          |    | 13                                                                                                                                                                                                           |
| 17 | Limitations              | 19 | Discuss limitations of the study, taking into account sources of potential bias or imprecision. Discuss both direction and magnitude of any potential bias                                                   |
| 18 |                          |    | 16                                                                                                                                                                                                           |
| 19 |                          |    |                                                                                                                                                                                                              |
| 20 | Interpretation           | 20 | Give a cautious overall interpretation of results considering objectives, limitations, multiplicity of analyses, results from similar studies, and other relevant evidence                                   |
| 21 |                          |    | 13-16                                                                                                                                                                                                        |
| 22 |                          |    |                                                                                                                                                                                                              |
| 23 |                          |    |                                                                                                                                                                                                              |
| 24 | Generalisability         | 21 | Discuss the generalisability (external validity) of the study results                                                                                                                                        |
| 25 |                          |    | 15-16                                                                                                                                                                                                        |
| 26 |                          |    |                                                                                                                                                                                                              |
| 27 | <b>Other information</b> |    |                                                                                                                                                                                                              |
| 28 | Funding                  | 22 | Give the source of funding and the role of the funders for the present study and, if applicable, for the original study on which the present article is based                                                |
| 29 |                          |    | 17                                                                                                                                                                                                           |
| 30 |                          |    |                                                                                                                                                                                                              |
| 31 |                          |    |                                                                                                                                                                                                              |
| 32 |                          |    |                                                                                                                                                                                                              |

\*Give information separately for exposed and unexposed groups.

**Note:** An Explanation and Elaboration article discusses each checklist item and gives methodological background and published examples of transparent reporting. The STROBE checklist is best used in conjunction with this article (freely available on the Web sites of PLoS Medicine at <http://www.plosmedicine.org/>, Annals of Internal Medicine at <http://www.annals.org/>, and Epidemiology at <http://www.epidem.com/>). Information on the STROBE Initiative is available at [www.strobe-statement.org](http://www.strobe-statement.org).
