# Supplementary material for: Association of long-term exposure to PM2.5 with hypertension prevalence and blood pressure in China: a cross-sectional study
Source: PubMed Central journal article supplement — BMJ Open. 2021 Dec 9;11(12):e050159. doi: 10.1136/bmjopen-2021-050159 (PMC8663071; doi:10.1136/bmjopen-2021-050159), 2021-12-09
Supplement: bmjopen-2021-050159supp001.pdf [file bmjopen-2021-050159supp001.pdf]

1 **SUPPLEMENTAL MATERIAL**

2 **Supplement 1. Collection of medication data in China PEACE Million Persons Project.**

3 Potential participants who were taking medications were required to bring their drug  
4 packaging (boxes) to the project sites. During the face-to-face interview, local project staff  
5 asked participants whether they always took anti-hypertension, lipid-lowering, anti-diabetics,  
6 or anti-platelet drugs during the past 2 weeks. Those who answered “yes” and knew the  
7 name of the drug were further asked to report the name, dose, and frequency of each drug.  
8 For those who did not remember the exact dose of the drug, the number of tablets or pills  
9 taken was recorded. Interviewers searched and selected drug names or the first letter of the  
10 Chinese phonetic alphabet participants answered by entering the generic name or trade  
11 name of each drug in the electronic data collecting system. In this system, a data dictionary  
12 was used to confirm drug information, including the drug class, generic name, trade name,  
13 and corresponding unique ID.  
14

15 **Supplement 2. Summary statistics for daily PM<sub>2.5</sub> (µg/m<sup>3</sup>) concentrations of assigned**  
 16 **monitors in 83 study regions.**

| No. | Mean  | Median | 25 <sup>th</sup><br>percentile | 75 <sup>th</sup><br>percentile | Minimum | Maximum | Total<br>(days) | Missing<br>(days) |
|-----|-------|--------|--------------------------------|--------------------------------|---------|---------|-----------------|-------------------|
| 1   | 67.9  | 50     | 26                             | 88                             | 5       | 540     | 1461            | 22                |
| 2   | 65.48 | 48     | 23                             | 85                             | 3       | 515     | 1461            | 25                |
| 3   | 56.39 | 40     | 19                             | 76                             | 2       | 448     | 1461            | 18                |
| 4   | 69.26 | 50     | 27                             | 88                             | 4       | 529     | 1461            | 10                |
| 5   | 57.73 | 41     | 20                             | 77                             | 4       | 446     | 1461            | 9                 |
| 6   | 64.46 | 51     | 32                             | 79.5                           | 6       | 350     | 1461            | 13                |
| 7   | 62.85 | 50     | 30                             | 78                             | 4       | 409     | 1461            | 38                |
| 8   | 68.35 | 54     | 34                             | 83.5                           | 7       | 408     | 1461            | 37                |
| 9   | 64.46 | 51     | 32                             | 79.5                           | 6       | 350     | 1461            | 13                |
| 10  | 65.52 | 51     | 32                             | 81                             | 7       | 410     | 1461            | 34                |
| 11  | 86.31 | 61     | 38                             | 107                            | 5       | 708     | 1461            | 37                |
| 12  | 63.99 | 52     | 37                             | 76                             | 6       | 421     | 1461            | 18                |
| 13  | 61.01 | 50     | 30                             | 79                             | 2       | 290     | 1461            | 24                |
| 14  | 60.51 | 49     | 32                             | 76                             | 7       | 390     | 1461            | 70                |
| 15  | 46.19 | 40     | 29                             | 55                             | 7       | 276     | 1461            | 44                |
| 16  | 22.9  | 18     | 12                             | 29                             | 3       | 187     | 1461            | 59                |
| 17  | 54.55 | 41     | 26                             | 68                             | 3       | 932     | 1461            | 14                |
| 18  | 40.93 | 32     | 20                             | 50                             | 5       | 450     | 1461            | 16                |
| 19  | 44.97 | 35     | 22                             | 56                             | 6       | 353     | 1461            | 39                |
| 20  | 48.8  | 37     | 24                             | 59                             | 6       | 508     | 1461            | 15                |
| 21  | 45.3  | 31     | 19                             | 55                             | 3       | 612     | 1461            | 27                |
| 22  | 30.54 | 22     | 14                             | 39                             | 2       | 308     | 1461            | 17                |
| 23  | 45.36 | 34     | 21                             | 58                             | 3       | 378     | 1461            | 24                |
| 24  | 54.24 | 33     | 21                             | 66                             | 5       | 730     | 1461            | 24                |
| 25  | 39.52 | 29     | 18                             | 49                             | 3       | 502     | 1461            | 78                |
| 26  | 42.91 | 36     | 22                             | 55                             | 4       | 235     | 1461            | 24                |
| 27  | 44.22 | 36     | 22                             | 58                             | 5       | 225     | 1461            | 60                |
| 28  | 44.97 | 38     | 24                             | 58                             | 5       | 218     | 1461            | 22                |
| 29  | 44.32 | 37     | 23                             | 57                             | 6       | 224     | 1461            | 12                |
| 30* | 49.23 | 40     | 28                             | 62                             | 10      | 271     | 797             | 1                 |
| 31  | 52.7  | 42     | 27                             | 67                             | 7       | 284     | 1461            | 9                 |
| 32  | 51.19 | 43     | 28                             | 64                             | 3       | 250     | 1461            | 40                |
| 33  | 49.98 | 44     | 31                             | 61                             | 6       | 259     | 1461            | 26                |
| 34  | 47.59 | 40     | 27                             | 59                             | 3       | 233     | 1461            | 30                |
| 35  | 27.35 | 25     | 17                             | 35                             | 2       | 114     | 1461            | 46                |
| 36  | 26.16 | 22     | 14                             | 34                             | 2       | 233     | 1461            | 5                 |
| 37* | 32.18 | 25     | 14                             | 45                             | 4       | 155     | 650             | 15                |
| 38  | 45.33 | 40     | 29                             | 57                             | 9       | 209     | 1461            | 32                |
| 39  | 49.12 | 44     | 31                             | 62                             | 3       | 356     | 1461            | 27                |
| 40  | 74.08 | 60     | 40                             | 92                             | 7       | 431     | 1461            | 22                |
| 41  | 56.81 | 46     | 31                             | 70                             | 7       | 327     | 1461            | 44                |
| 42* | 70.49 | 57     | 40                             | 82                             | 6       | 514     | 797             | 56                |
| 43* | 56.69 | 46     | 34                             | 65                             | 14      | 257     | 606             | 15                |
| 44  | 69.96 | 53     | 35                             | 88                             | 5       | 548     | 1461            | 57                |
| 45  | 62    | 50     | 31                             | 81                             | 3       | 275     | 1461            | 20                |
| 46  | 44.01 | 38     | 26                             | 56                             | 5       | 195     | 1461            | 31                |
| 47  | 48.13 | 43     | 29                             | 61                             | 6       | 478     | 1461            | 43                |
| 48  | 51.57 | 43     | 29                             | 65                             | 5       | 289     | 1461            | 10                |
| 49  | 39.33 | 33     | 23                             | 50                             | 6       | 214     | 1461            | 12                |
| 50  | 32.84 | 29     | 20                             | 42                             | 5       | 121     | 1461            | 22                |

|     |       |      |    |    |    |     |      |     |
|-----|-------|------|----|----|----|-----|------|-----|
| 51  | 32.48 | 28   | 18 | 43 | 5  | 149 | 1461 | 35  |
| 52  | 27.19 | 24   | 14 | 36 | 3  | 120 | 1461 | 31  |
| 53  | 38.01 | 33   | 21 | 49 | 5  | 192 | 1461 | 16  |
| 54  | 35.67 | 30   | 19 | 46 | 3  | 269 | 1461 | 13  |
| 55  | 50.36 | 42   | 27 | 64 | 6  | 286 | 1461 | 23  |
| 56  | 44.34 | 35   | 23 | 56 | 5  | 333 | 1461 | 6   |
| 57  | 35.14 | 29   | 16 | 47 | 3  | 202 | 1461 | 22  |
| 58  | 22.1  | 18   | 14 | 27 | 3  | 123 | 1461 | 31  |
| 59  | 15.14 | 13   | 9  | 18 | 2  | 68  | 1461 | 12  |
| 60* | 37.75 | 29   | 18 | 47 | 5  | 183 | 773  | 20  |
| 61  | 49.89 | 41   | 30 | 61 | 8  | 222 | 1461 | 27  |
| 62  | 60.72 | 49   | 32 | 77 | 5  | 353 | 1461 | 8   |
| 63  | 42.87 | 36   | 24 | 55 | 5  | 215 | 1461 | 16  |
| 64  | 49.35 | 40   | 24 | 65 | 3  | 235 | 1461 | 13  |
| 65  | 32.64 | 28   | 18 | 42 | 4  | 195 | 1461 | 23  |
| 66  | 30.96 | 28   | 21 | 39 | 7  | 123 | 1461 | 10  |
| 67  | 29.79 | 28   | 20 | 36 | 7  | 102 | 1461 | 23  |
| 68  | 13.86 | 14   | 12 | 15 | 3  | 51  | 1461 | 109 |
| 69  | 25.99 | 19   | 13 | 32 | 5  | 187 | 1461 | 33  |
| 70  | 24.49 | 19   | 13 | 30 | 2  | 124 | 1461 | 156 |
| 71  | 11.95 | 10   | 7  | 15 | 2  | 88  | 1461 | 87  |
| 72  | 51.21 | 42   | 30 | 63 | 10 | 239 | 1461 | 238 |
| 73  | 10.62 | 9    | 7  | 13 | 4  | 73  | 1461 | 46  |
| 74  | 53.8  | 41.5 | 28 | 64 | 5  | 328 | 1461 | 19  |
| 75  | 38.88 | 32   | 23 | 47 | 4  | 169 | 1461 | 27  |
| 76  | 44.45 | 36   | 24 | 57 | 4  | 581 | 1461 | 59  |
| 77  | 44.1  | 36   | 25 | 53 | 5  | 287 | 1461 | 44  |
| 78* | 44.04 | 38   | 27 | 56 | 9  | 139 | 488  | 27  |
| 79  | 55.15 | 45   | 30 | 68 | 5  | 363 | 1461 | 14  |
| 80  | 44.69 | 36   | 24 | 55 | 5  | 219 | 1461 | 50  |
| 81  | 65.37 | 34   | 20 | 85 | 5  | 447 | 1461 | 97  |
| 82  | 57.76 | 29   | 19 | 70 | 3  | 414 | 1461 | 58  |
| 83  | 51.7  | 26   | 14 | 65 | 3  | 406 | 1461 | 42  |

17 Note:

18 \* Monitors being available after 2015

19 Total: Number of days of assigned monitors being available during 2015-2018

20 Missing: Number of days with missing PM<sub>2.5</sub> concentration during 2015-2018

21

22 **Supplement 3. Distribution of study sites in China Patient-Centered Evaluative**  
23 **Assessment of Cardiac Events Million Persons Project.**

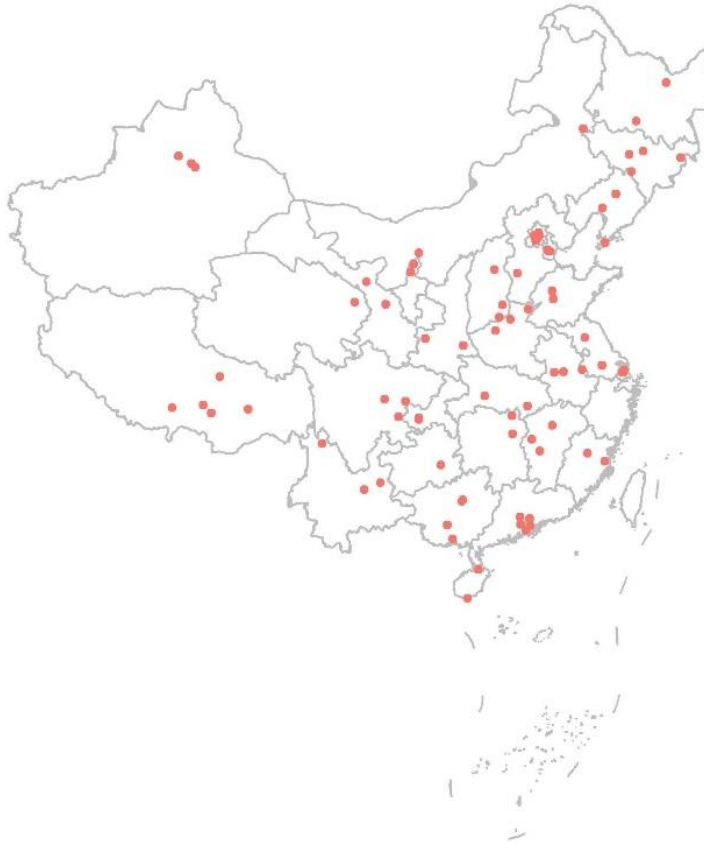

24

25

26 **Supplement 4. Characteristics of the study population.**

| Variable                                                        | Total<br>(n=883,827) |
|-----------------------------------------------------------------|----------------------|
| <b>Socio-demographics</b>                                       |                      |
| Age, mean (SD), years                                           | 55.5 (10.1)          |
| Female, n (%)                                                   | 533897 (60.4)        |
| Urban residence, n (%)                                          | 657608 (74.4)        |
| Han ethnic group, n (%)                                         | 805479 (91.1)        |
| College or above                                                | 102764 (11.6)        |
| <b>Regions, n (%)</b>                                           |                      |
| Eastern                                                         | 325253 (36.8)        |
| Central                                                         | 178435 (20.2)        |
| Western                                                         | 311599 (35.3)        |
| Northeastern                                                    | 68540 (7.8)          |
| <b>Cardiovascular risk factors, n (%)</b>                       |                      |
| Obesity                                                         | 142150 (16.1)        |
| Current drinker                                                 | 194967 (22.1)        |
| Diabetes                                                        | 173950 (19.7)        |
| Current smoker                                                  | 161006 (18.2)        |
| Hypertension                                                    | 381223 (43.1)        |
| <b>Blood pressures</b>                                          |                      |
| Systolic blood pressure, mean (SD)                              | 143.5 (22.2)         |
| Diastolic blood pressure, mean (SD)                             | 83.1 (12.3)          |
| <b>PM<sub>2.5</sub> exposures</b>                               |                      |
| 1-y average PM <sub>2.5</sub> exposure, mean (SD)               | 49.2 (16.4)          |
| Above WHO Interim Target 1 (IT-1, 35 µg/m <sup>3</sup> ), n (%) | 706415 (79.9)        |
| Above WHO Interim Target 2 (IT-2, 25 µg/m <sup>3</sup> ), n (%) | 842356 (95.3)        |
| Above WHO Interim Target 3 (IT-3, 15 µg/m <sup>3</sup> ), n (%) | 864119 (97.8)        |

27

28

29 **Supplement 5. The effect of PM<sub>2.5</sub> exposure on hypertension prevalence.**

| Model                          | Per 10 µg/m <sup>3</sup> PM <sub>2.5</sub> increment |         |
|--------------------------------|------------------------------------------------------|---------|
|                                | Odds ratios (95% confidence intervals)               | p-Value |
| <b>Hypertension prevalence</b> |                                                      |         |
| Model 1                        | 1.10 (1.09–1.11)                                     | <0.001  |
| Model 2                        | 1.10 (1.09–1.11)                                     | <0.001  |
| Model 3                        | 1.09 (1.08–1.10)                                     | <0.001  |
| Model 4                        | 1.09 (1.08–1.10)                                     | <0.001  |
| Model 5                        | 1.04 (1.02–1.05)                                     | <0.001  |
| Model 6                        | 1.04 (1.02–1.05)                                     | <0.001  |

30 Model 1: Included age and sex;

31 Model 2: Model 1 + education level and urbanity;

32 Model 3: Model 2 + smoking status, alcohol consumption, obesity, and diabetes;

33 Model 4: Model 3 + day of week of the medical examination;

34 Model 5: Model 3 + season of the medical examination;

35 Model 6: Model 3 + day of week + season.

36

37 **Supplement 6. The effect of PM<sub>2.5</sub> exposure on blood pressure.**

| Model                           | Per 10 µg/m <sup>3</sup> PM <sub>2.5</sub> increment |         |
|---------------------------------|------------------------------------------------------|---------|
|                                 | mmHg (95% confidence intervals)                      | p-value |
| <b>Systolic blood pressure</b>  |                                                      |         |
| Model 1                         | 0.58 (0.49–0.67)                                     | <0.001  |
| Model 2                         | 0.57 (0.48–0.66)                                     | <0.001  |
| Model 3                         | 0.45 (0.36–0.54)                                     | <0.001  |
| Model 4                         | 0.50 (0.41–0.59)                                     | <0.001  |
| Model 5                         | 0.50 (0.41–0.59)                                     | <0.001  |
| Model 6                         | 0.19 (0.10–0.28)                                     | <0.001  |
| Model 7                         | 0.19 (0.10–0.28)                                     | <0.001  |
| <b>Diastolic blood pressure</b> |                                                      |         |
| Model 1                         | 0.29 (0.23–0.34)                                     | <0.001  |
| Model 2                         | 0.28 (0.23–0.34)                                     | <0.001  |
| Model 3                         | 0.21 (0.15–0.26)                                     | <0.001  |
| Model 4                         | 0.23 (0.18–0.28)                                     | <0.001  |
| Model 5                         | 0.23 (0.18–0.28)                                     | <0.001  |
| Model 6                         | 0.13 (0.08–0.18)                                     | <0.001  |
| Model 7                         | 0.13 (0.08–0.18)                                     | <0.001  |

38 Model 1: Included age and sex;

39 Model 2: Model 1 + education level and urbanity;

40 Model 3: Model 2 + smoking status, alcohol consumption, obesity, and diabetes;

41 Model 4: Model 3 + use of antihypertensive medication;

42 Model 5: Model 4 + day of week of the medical examination;

43 Model 6: Model 3 + season of the medical examination;

44 Model 7: Model 3 + day of week + season.
